# Supplementary material for: Atrial fibrillation in patients with severe mental disorders and the risk of stroke, fatal thromboembolic events and bleeding: a nationwide cohort study
Source: PubMed Central journal article supplement — BMJ Open. 2017 Dec 6;7(12):e018209. doi: 10.1136/bmjopen-2017-018209 (PMC5728273; doi:10.1136/bmjopen-2017-018209), 2017-12-06

## **SUPPLEMENTAL INFORMATION**

### **Atrial fibrillation in patients with severe mental disorders and the risk of stroke, fatal thromboembolic events, and bleeding: a nationwide cohort study**

Mette Søgaard, PhD<sup>1,2</sup>, Flemming Skjøth, PhD<sup>2,3</sup>, Jette Nordstrom Kjældgaard<sup>1,2</sup>, BSCEE, Torben Bjerregaard Larsen, PhD<sup>1,2,5</sup>, Søren Pihlkjær Hjortshøj, PhD<sup>4,5</sup>, Sam Riahi, PhD<sup>1,4,5</sup>

<sup>1</sup>Department of Cardiology, Aalborg University Hospital, Denmark

<sup>2</sup>Aalborg Thrombosis Research Unit, Department of Clinical Medicine, Faculty of Health, Aalborg University, Aalborg, Denmark

<sup>3</sup>Unit for Clinical Biostatistics, Aalborg University Hospital, Denmark

<sup>4</sup>Department of Clinical Medicine, Aalborg University, Denmark

<sup>5</sup>AF-Study group, Aalborg University Hospital, Denmark

#### **Supplementary tables and figures**

Supplementary Table 1: Definitions on comorbidity, concomitant medications, and study outcomes according to ICD-10 codes and ATC-codes.

Supplementary Table 2: Risk score definitions

Supplementary Table 3: Descriptive characteristics of AF patients with schizophrenia, severe depression, or bipolar disease and their matched comparison cohorts.

Supplementary Figure 1: Flowchart of the study population.

Supplementary Figure 2: Cumulative incidence curves of initiation of oral anticoagulation therapy in age, sex and calendar time matched atrial fibrillation patients with and without mental disorders.

**Supplementary Table 1.** Definitions on comorbidity, concomitant medication, and study outcomes according to ICD-10 codes and ATC-codes.

| <b>Diagnoses</b>                     | <b>International Classification of Diseases 10th revision (ICD-10) code</b>                                                                | <b>Anatomical Therapeutic Chemical (ATC) code</b> |
|--------------------------------------|--------------------------------------------------------------------------------------------------------------------------------------------|---------------------------------------------------|
| <b>Study population</b>              |                                                                                                                                            |                                                   |
| Atrial fibrillation                  | I48                                                                                                                                        |                                                   |
| <b>Exposure</b>                      |                                                                                                                                            |                                                   |
| Schizophrenia                        | F20                                                                                                                                        |                                                   |
| Bipolar disease                      | F30 F31                                                                                                                                    |                                                   |
| Severe depression                    | F322 F323 F332 F333                                                                                                                        |                                                   |
| <b>Outcomes</b>                      |                                                                                                                                            |                                                   |
| Ischemic stroke                      | I63 I64                                                                                                                                    |                                                   |
| Major bleeding                       | I60 I61 I62 K250 K252 K254<br>K260 K262 K264 K270 K272<br>K274 K280 K282 K290 K920<br>K921 K922 D62 J942 H113 H356<br>H431 N02 R04 R31 R58 |                                                   |
| Thromboembolic events                |                                                                                                                                            |                                                   |
| Ischemic stroke                      | I63 I64                                                                                                                                    |                                                   |
| Systemic embolism                    | I74                                                                                                                                        |                                                   |
| Pulmonary embolism                   | I26                                                                                                                                        |                                                   |
| Myocardial infarction                | I21 I23                                                                                                                                    |                                                   |
| <b>Baseline covariates</b>           |                                                                                                                                            |                                                   |
| Heart failure                        | I110 I130 I132 I420 I50                                                                                                                    |                                                   |
| Hypertension                         |                                                                                                                                            | See specified definition <sup>a</sup>             |
| Peripheral vascular/ischemic disease | I702 I703 I704 I705 I706 I707<br>I708 I709 I71 I739                                                                                        |                                                   |
| Diabetes                             | E100 E101 E109 E110 E111 E119                                                                                                              | A10                                               |
| Prior bleeding                       | K250 K252 K254 K260 K262<br>K264 K270 K272 K274 K280                                                                                       |                                                   |

|                                                  |                                                                                                              |                                                                              |
|--------------------------------------------------|--------------------------------------------------------------------------------------------------------------|------------------------------------------------------------------------------|
|                                                  | K282 K290 K920 K921 K922 D62<br>J942 H113 H356 H431 N02 R04<br>R31 R58                                       |                                                                              |
| Renal dysfunction                                | I12 I13 N00 N01 N02 N03 N04<br>N05 N07 N11 N14 N17 N18 N19<br>Q61                                            |                                                                              |
| Prior VTE                                        | I801 I802 I803 I808 I809 I819<br>I636 I676 I822 I823 I828 I829                                               |                                                                              |
| Chronic pulmonary disease                        | J40 J41 J42 J43 J44 J45 J46 J47<br>J60 J61 J62 J63 J64 J65 J67 J684<br>J701 J703 J841 J920 J961 J982<br>J983 |                                                                              |
| Cancer                                           | C                                                                                                            |                                                                              |
| Alcohol-related disease                          | E224 E529A F10 G312 G621<br>G721 I426 K292 K70 K860<br>L278A O354 T51 Z714 Z721                              |                                                                              |
| Medications within 365 days<br>before index date |                                                                                                              |                                                                              |
| Coumarin                                         |                                                                                                              | B01AA                                                                        |
| NOAC                                             |                                                                                                              | B01AF01 B01AF02 B01AE07                                                      |
| Aspirin                                          |                                                                                                              | B01AC06                                                                      |
| Clopidogrel                                      |                                                                                                              | B01AC04                                                                      |
| NSAID                                            |                                                                                                              | M01A                                                                         |
| Digoxin                                          |                                                                                                              | C01AA05                                                                      |
| Non-loop diuretics                               |                                                                                                              | C02DA C02L C03A C03B C03D<br>C03E C03X C07C C07D C08G<br>C09BA C09DA C09XA52 |
| Loop-diuretics                                   |                                                                                                              | C03C                                                                         |
| Beta-blocker                                     |                                                                                                              | C07                                                                          |
| Calcium channel blocker                          |                                                                                                              | C07F C08 C09BB C09DB                                                         |
| Renin-angiotensin inhibitor                      |                                                                                                              | C09                                                                          |
| Statins                                          |                                                                                                              | C10                                                                          |

Abbreviations: VTE, venous thromboembolism; NOAC, Non-vitamin K oral anticoagulant; NSAID, Non-steroidal anti-inflammatory drugs.

<sup>a</sup>We identified subjects with hypertension from combination treatment with at least two of the following classes of antihypertensive drugs:

I- Alpha adrenergic blockers (C02A, C02B, C02C)

II· Non-loop diuretics (C02DA, C02L, C03A, C03B, C03D, C03E, C03X, C07C, C07D, C08G, C09BA, C09DA, C09XA52)

III· Vasodilators (C02DB, C02DD, C02DG, C04, C05)

IV· Beta blockers (C07)

V· Calcium channel blockers (C07F, C08, C09BB, C09DB)

VI· Renin-angiotensin system inhibitors (C09)

**Supplementary Table 2.** Risk score definitions.

| <b>Risk score</b>                                                                       | <b>Points<br/>if present</b> |
|-----------------------------------------------------------------------------------------|------------------------------|
| <b>CHA<sub>2</sub>DS<sub>2</sub>VASc<sup>a</sup></b>                                    |                              |
| Congestive heart failure or Left Ventricular Dysfunction                                | 1                            |
| Hypertension                                                                            | 1                            |
| Age ≥ 65 years                                                                          | 1                            |
| Age ≥ 75 years                                                                          | 1                            |
| Diabetes mellitus                                                                       | 1                            |
| Stroke (ischemic stroke, transient ischemic disease or systemic embolism)               | 2                            |
| Vascular disease (myocardial infarction, peripheral arterial disease, or aortic plaque) | 1                            |
| Sex category (female)                                                                   | 1                            |
| <b>HAS-BLED<sup>b</sup></b>                                                             |                              |
| Hypertension                                                                            | 1                            |
| Abnormal renal function                                                                 | 1                            |
| Abnormal hepatic function                                                               | 1                            |
| Stroke (ischemic stroke or transient ischemic attack)                                   | 1                            |
| Bleeding                                                                                | 1                            |
| Labile international normalized ratio <sup>c</sup>                                      | 1                            |
| Elderly age (≥ 65 years)                                                                | 1                            |
| Drugs (aspirin, clopidogrel, or non-steroidal anti-inflammatory drugs)                  | 1                            |
| Alcohol intake                                                                          | 1                            |

<sup>a</sup>Reflects stroke risk in atrial fibrillation patients not in anticoagulant therapy (Lip GYH, Nieuwlaat R, Pisters R, Lane DA, Crijns HJGM. Refining clinical risk stratification for predicting stroke and thromboembolism in atrial fibrillation using a novel risk factor-based approach: the euro heart survey on atrial fibrillation. *Chest* 2010;137(2):263-72)

<sup>b</sup>Reflects bleeding risk in atrial fibrillation patients undergoing anticoagulant therapy (Pisters R, Lane DA, Nieuwlaat R, de Vos CB, Crijns HJGM, Lip GYH. A novel user-friendly score (HAS-BLED) to assess 1-year risk of major bleeding in patients with atrial fibrillation: the Euro Heart Survey. *Chest* 2010;138(5):1093-100).

<sup>c</sup>Not included due to unavailable information

**Supplementary Figure 1.** Flowchart of the study population.

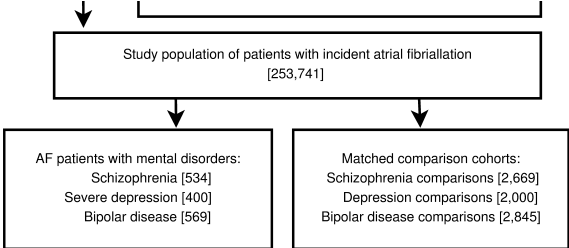

**Supplementary Table 3.** Descriptive characteristics of AF patients with schizophrenia, severe depression, or bipolar disease and their matched comparison cohorts.

| Characteristic, % (N)                                 | Schizophrenia          |               | Severe depression      |                   | Bipolar disease        |                 |
|-------------------------------------------------------|------------------------|---------------|------------------------|-------------------|------------------------|-----------------|
|                                                       | Matched AF comparisons | Schizophrenia | Matched AF comparisons | Severe depression | Matched AF comparisons | Bipolar disease |
| Total number                                          | 2,669                  | 534           | 2,000                  | 400               | 2,845                  | 569             |
| Females                                               | 45.7 (1,219)           | 45.7 (244)    | 61.8 (1,235)           | 61.8 (247)        | 59.6 (1,695)           | 59.6 (339)      |
| Mean age (SD)                                         | 64.5 (13.7)            | 64.5 (13.7)   | 73.5 (14.0)            | 73.7 (14.0)       | 73.1 (11.2)            | 73.0 (11.2)     |
| Mean CHA <sub>2</sub> DS <sub>2</sub> VASc score (SD) | 2.3 (1.8)              | 2.5 (1.7)     | 3.3 (1.8)              | 3.6 (2.0)         | 3.2 (1.8)              | 3.3 (1.8)       |
| Mean HASBLED score (SD)                               | 1.8 (1.3)              | 1.9 (1.3)     | 2.2 (1.2)              | 2.5 (1.4)         | 2.2 (1.2)              | 2.5 (1.3)       |
| Prior stroke                                          | 13.3 (355)             | 14.2 (76)     | 17.9 (358)             | 30.3 (121)        | 17.8 (505)             | 20.2 (115)      |
| Heart failure                                         | 19.4 (518)             | 30.0 (160)    | 23.4 (469)             | 30.3 (121)        | 25.3 (720)             | 29.3 (167)      |
| Hypertension                                          | 38.6 (1030)            | 26.6 (142)    | 44.1 (882)             | 44.5 (178)        | 45.2 (1287)            | 36.6 (208)      |
| Myocardial infarction                                 | 6.9 (185)              | 8.2 (44)      | 10.7 (213)             | 11.3 (45)         | 9.6 (273)              | 9.3 (53)        |
| Peripheral arterial disease                           | 5.7 (152)              | 6.7 (36)      | 8.1 (161)              | 10.0 (40)         | 7.1 (201)              | 9.0 (51)        |
| Diabetes                                              | 12.9 (344)             | 24.3 (130)    | 12.9 (259)             | 15.8 (63)         | 12.6 (358)             | 20.2 (115)      |
| Prior bleeding                                        | 13.0 (346)             | 28.1 (150)    | 15.4 (307)             | 24.0 (96)         | 14.4 (409)             | 23.0 (131)      |
| Renal dysfunction                                     | 4.8 (127)              | 10.1 (54)     | 4.1 (82)               | 8.5 (34)          | 5.1 (144)              | 15.8 (90)       |
| Prior venous thromboembolism                          | 4.8 (128)              | 7.3 (39)      | 5.9 (119)              | 10.8 (43)         | 4.7 (135)              | 10.0 (57)       |
| Chronic pulmonary disease                             | 13.3 (355)             | 28.7 (153)    | 14.9 (299)             | 22.3 (89)         | 16.1 (458)             | 30.8 (175)      |
| Cancer                                                | 12.9 (345)             | 12.9 (69)     | 17.9 (357)             | 14.8 (59)         | 17.3 (493)             | 17.0 (97)       |
| Alcohol-related disease                               | 5.9 (158)              | 19.1 (102)    | 3.6 (73)               | 11.0 (44)         | 4.3 (122)              | 20.9 (119)      |

|                                                      |            |            |            |            |             |            |
|------------------------------------------------------|------------|------------|------------|------------|-------------|------------|
| Coumarin                                             | 13.3 (356) | 5.1 (27)   | 13.7 (273) | 8.8 (35)   | 14.3 (407)  | 12.1 (69)  |
| NOAC                                                 | 3.7 (99)   | 3.4 (18)   | 2.8 (56)   | 2.3 (9)    | 3.4 (98)    | 2.3 (13)   |
| Aspirin                                              | 29.6 (790) | 33.0 (176) | 37.2 (744) | 40.5 (162) | 37.7 (1073) | 38.1 (217) |
| Clopidogrel                                          | 4.3 (116)  | 5.6 (30)   | 5.3 (106)  | 9.0 (36)   | 5.0 (143)   | 5.6 (32)   |
| NSAID                                                | 27.1 (722) | 25.1 (134) | 27.1 (542) | 27.3 (109) | 26.2 (745)  | 25.0 (142) |
| Digoxin                                              | 6.8 (182)  | 9.9 (53)   | 9.3 (187)  | 8.8 (35)   | 10.7 (304)  | 12.1 (69)  |
| Non-loop diuretics                                   | 31.4 (839) | 25.1 (134) | 38.2 (764) | 38.8 (155) | 38.3 (1089) | 34.4 (196) |
| Loop-diuretics                                       | 18.7 (500) | 34.8 (186) | 24.4 (488) | 28.8 (115) | 23.7 (675)  | 36.0 (205) |
| Beta-blocker                                         | 31.4 (837) | 22.7 (121) | 33.8 (676) | 28.0 (112) | 34.4 (980)  | 24.3 (138) |
| Calcium channel blocker                              | 22.1 (591) | 17.0 (91)  | 27.1 (543) | 31.0 (124) | 26.5 (753)  | 25.1 (143) |
| Renin-angiotensin inhibitor                          | 34.2 (914) | 23.8 (127) | 37.0 (741) | 37.5 (150) | 39.2 (1115) | 32.0 (182) |
| Statins                                              | 26.4 (704) | 23.2 (124) | 26.6 (531) | 26.0 (104) | 28.3 (804)  | 27.4 (156) |
| Antiepileptics                                       | 3.6 (95)   | 24.3 (130) | 4.7 (94)   | 16.0 (64)  | 4.5 (129)   | 39.5 (225) |
| Anticholinergics                                     | <4         | <4         | 0.2 (4)    | 2.3 (9)    | 0.1 (4)     | 5.3 (30)   |
| Antipsychotics, lithium and<br>anxiolytics/hypnotics | 21.4 (571) | 87.1 (465) | 26.6 (532) | 63.2 (253) | 28.8 (820)  | 83.3 (474) |
| Antidepressants                                      | 14.1 (375) | 34.8 (186) | 16.1 (323) | 78.5 (314) | 15.9 (453)  | 61.0 (347) |

Abbreviations:

SD: Standard deviation

NOAC: Non-vitamin K oral anticoagulant

NSAID: Non-steroidal anti-inflammatory drugs



**Supplementary Figure 2.** Cumulative incidence curves of initiation of oral anticoagulation therapy in age, sex and calendar time matched atrial fibrillation patients with and without mental disorders.

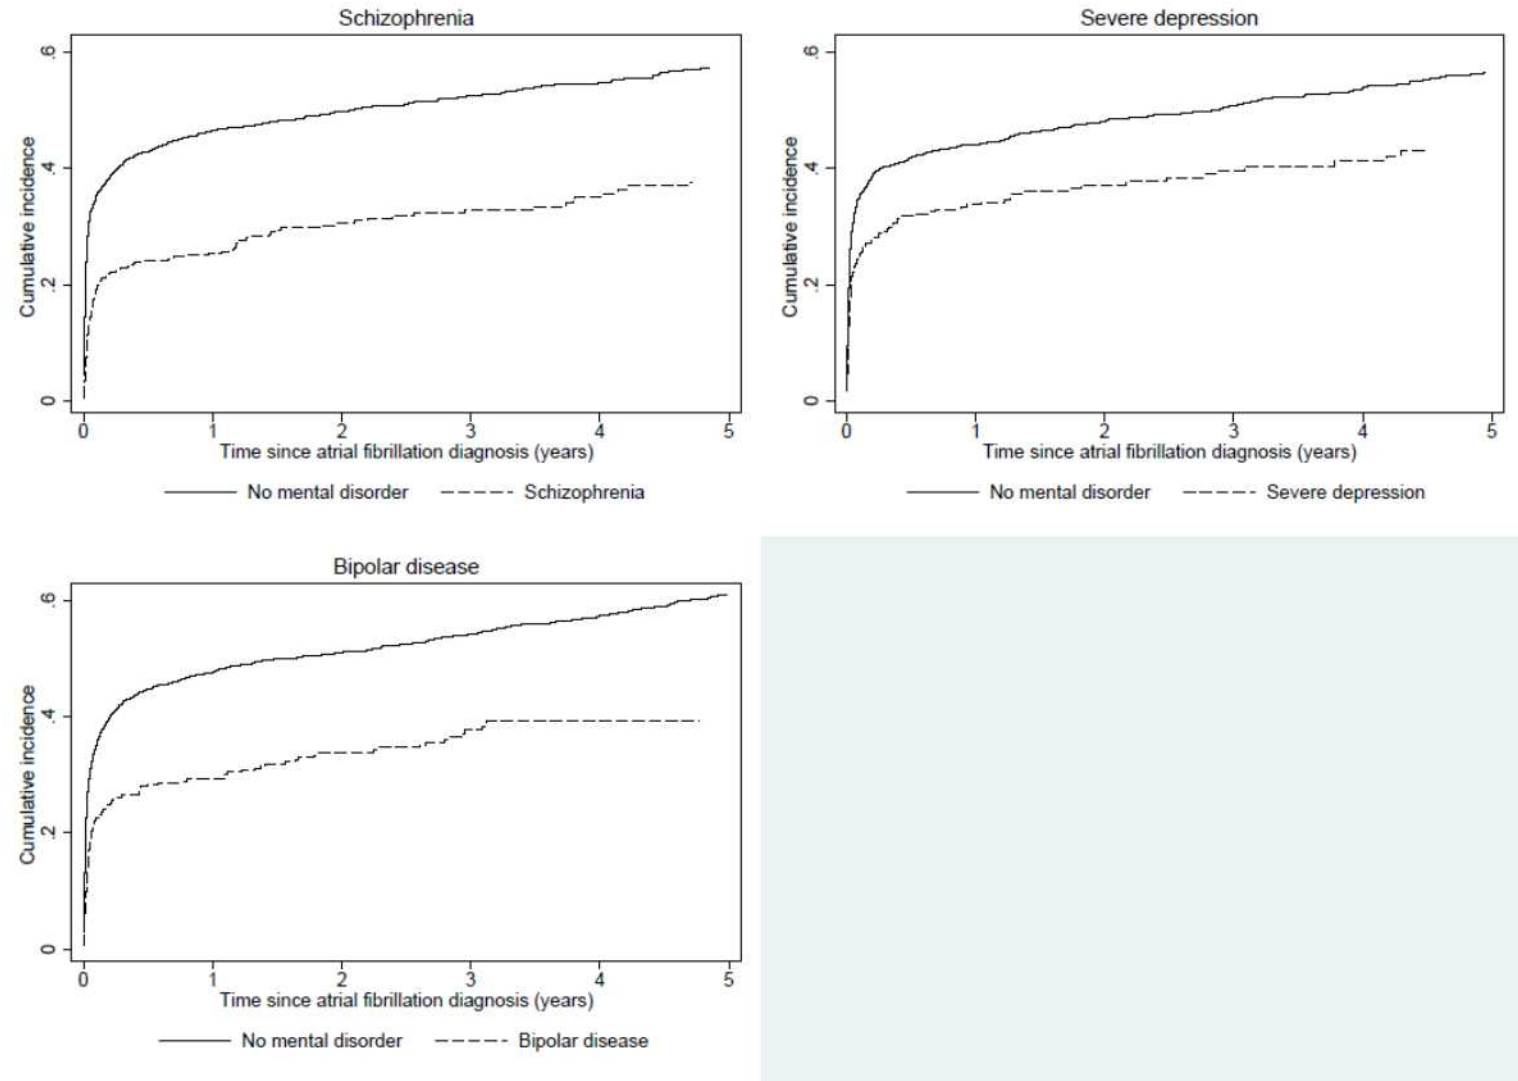

Supplement: bmjopen-2017-018209supp001.pdf [file bmjopen-2017-018209supp001.pdf]
