# Supplementary material for: Atrial fibrillation in patients with severe mental disorders and the risk of stroke, fatal thromboembolic events and bleeding: a nationwide cohort study
Source: PubMed Central journal article supplement — BMJ Open. 2017 Dec 6;7(12):e018209. doi: 10.1136/bmjopen-2017-018209 (PMC5728273; doi:10.1136/bmjopen-2017-018209), 2017-12-06
Supplement: bmjopen-2017-018209.draft_revisions.pdf [file bmjopen-2017-018209.draft_revisions.pdf]

# BMJ Open

BMJ Open is committed to open peer review. As part of this commitment we make the peer review history of every article we publish publicly available.

When an article is published we post the peer reviewers' comments and the authors' responses online. We also post the versions of the paper that were used during peer review. These are the versions that the peer review comments apply to.

The versions of the paper that follow are the versions that were submitted during the peer review process. They are not the versions of record or the final published versions. They should not be cited or distributed as the published version of this manuscript.

BMJ Open is an open access journal and the full, final, typeset and author-corrected version of record of the manuscript is available on our site with no access controls, subscription charges or pay-per-view fees (<http://bmjopen.bmj.com>).

If you have any questions on BMJ Open's open peer review process please email [editorial.bmjopen@bmj.com](mailto:editorial.bmjopen@bmj.com)

# BMJ Open

## Atrial fibrillation in patients with severe mental disorders and the risk of stroke and fatal thromboembolic events: a nationwide cohort study

|                                 |                                                                                                                                                                                                                                                                                                                                                                    |
|---------------------------------|--------------------------------------------------------------------------------------------------------------------------------------------------------------------------------------------------------------------------------------------------------------------------------------------------------------------------------------------------------------------|
| Journal:                        | <i>BMJ Open</i>                                                                                                                                                                                                                                                                                                                                                    |
| Manuscript ID                   | bmjopen-2017-018209                                                                                                                                                                                                                                                                                                                                                |
| Article Type:                   | Research                                                                                                                                                                                                                                                                                                                                                           |
| Date Submitted by the Author:   | 14-Jun-2017                                                                                                                                                                                                                                                                                                                                                        |
| Complete List of Authors:       | Søgaard, Mette; Aalborg University Hospital, Skjøth, Flemming; Aalborg University Hospital, Aalborg Thrombosis Research Unit<br>Kjældgaard, Jette; Aalborg University Hospital<br>Larsen, Torben; Aalborg Hospital, Department of Cardiology<br>Hjortshøj, Søren; Aalborg University Hospital, Department of Cardiology<br>Riahi, Sam; Aalborg University Hospital |
| <b>Primary Subject Heading</b>: | Cardiovascular medicine                                                                                                                                                                                                                                                                                                                                            |
| Secondary Subject Heading:      | Mental health                                                                                                                                                                                                                                                                                                                                                      |
| Keywords:                       | Atrial fibrillation, Schizophrenia & psychotic disorders < PSYCHIATRY, Depression & mood disorders < PSYCHIATRY, bipolar disease, Stroke medicine < INTERNAL MEDICINE, outcome                                                                                                                                                                                     |
|                                 |                                                                                                                                                                                                                                                                                                                                                                    |

SCHOLARONE™  
Manuscripts

Only

1  
2  
3  
4 **Atrial fibrillation in patients with severe mental disorders and the risk of stroke**  
5  
6 **and fatal thromboembolic events: a nationwide cohort study**  
7  
8  
9

10  
11 Mette Søgaard, PhD<sup>1,2</sup>, Flemming Skjøth, PhD<sup>2,3</sup>, Jette Nordstrom Kjældgaard<sup>1,2</sup>, BSCEE, Torben

12  
13 Bjerregaard Larsen, PhD<sup>1,2,5</sup>, Søren Pihlkjær Hjortshøj, PhD<sup>4,5</sup>, Sam Riahi, PhD<sup>1,4,5</sup>  
14  
15

16  
17  
18 <sup>1</sup>Department of Cardiology, Aalborg University Hospital, Denmark  
19

20 <sup>2</sup>Aalborg Thrombosis Research Unit, Department of Clinical Medicine, Faculty of Health, Aalborg  
21 University, Aalborg, Denmark  
22

23 <sup>3</sup>Unit for Clinical Biostatistics, Aalborg University Hospital, Denmark  
24

25 <sup>4</sup>Department of Clinical Medicine, Aalborg University, Denmark  
26

27 <sup>5</sup>AF-Study group, Aalborg University Hospital, Denmark  
28  
29  
30  
31  
32  
33  
34  
35

36 **Running title:** Atrial fibrillation outcomes in patients with severe mental disorders  
37  
38  
39  
40  
41

42 **Word count:** Abstract 276; text 3028.  
43  
44  
45  
46

47 **Corresponding author:**  
48

49 Mette Søgaard, DVM, PhD. Sønder Skovvej 15, 9000 Aalborg, Denmark.  
50

51 Phone: +4597664386; E-mail: mette.soegaard@rn.dk  
52  
53  
54  
55  
56  
57  
58  
59  
60

**ABSTRACT**

**Objectives:** Outcomes of atrial fibrillation (AF) in patients with severe mental disorders are largely unknown. We therefore compared rates of stroke and fatal thromboembolic events in AF patients with and without mental disorders.

**Design:** Nationwide registry-based cohort study.

**Setting:** Denmark (population 5,6 million), 2000-2015.

**Participants:** AF patients with schizophrenia (n=534), severe depression (n=400), or bipolar disease (n=569) matched 1:5 on age, sex and calendar time to AF patients without mental disorders.

**Exposure:** Inpatient or hospital-based outpatient diagnosis of schizophrenia, severe depression or bipolar disease.

**Primary and secondary outcome measures:** Hazard ratios (HR) for stroke and fatal thromboembolic events comparing patients with and without mental disorders estimated by Cox regression with sequential adjustment for stroke risk factors, comorbidity, and oral anticoagulant therapy (OAT).

**Results:** Compared with matched comparisons, crude 5-year HRs of ischemic stroke was 1.20 (95% confidence intervals (CI) 0.76-1.87) for schizophrenia, 1.20 (95% CI 0.79-1.82) for depression, and 1.09 (95% CI 0.72-1.65) for bipolar disease. Equivalent HRs of hemorrhagic stroke were 1.16 (95% CI 0.79-1.70), 1.30 (95% CI 0.93-1.82), 1.18 (0.84-1.66), respectively. After adjusting for stroke risk factors, comorbidity, and initiation of oral anticoagulant (OAC) therapy these HR declined toward the null. Crude HRs of fatal thromboembolic events were 3.93 (95% CI 2.11-7.30) for schizophrenia, 0.82 (95% CI 0.43-1.56) for depression, and 1.54 (95% CI 0.92-2.56) for bipolar disease.

**Conclusion:** Severe mental disorders in AF patients were associated with increased risk of ischemic and in particular hemorrhagic stroke compared with matched comparisons. These excess stroke

1  
2  
3  
4 rates were explained by higher prevalence of stroke risk factors, comorbidity and lower use of  
5  
6 OAT. AF patients with schizophrenia also experienced higher mortality following thromboembolic  
7  
8 events than matched comparisons.  
9

10  
11  
12 **Keywords:** Atrial fibrillation, schizophrenia, depression, bipolar disease, stroke, outcome.  
13  
14  
15  
16  
17  
18  
19  
20  
21  
22  
23  
24  
25  
26  
27  
28  
29  
30  
31  
32  
33  
34  
35  
36  
37  
38  
39  
40  
41  
42  
43  
44  
45  
46  
47  
48  
49  
50  
51  
52  
53  
54  
55  
56  
57  
58  
59  
60

For peer review only

## STRENGTHS AND LIMITATIONS OF THIS STUDY

- The study included all patients with a hospital diagnosis of atrial fibrillation in Denmark in 2000-2015. The study had complete follow-up on all participants from the nationwide Danish Civil Registration System.
- The study was conducted in a government financed healthcare system with equal access for the entire Danish population.
- Despite equal access to tax-supported health care in Denmark, diagnoses in patients with mental disorders may have been underreported.
- The study lacked data on alcohol, smoking, exercise, and other lifestyle related risk factors associated with increased risk of study outcomes. We were able to adjust for hospital diagnoses of alcohol-related conditions and other lifestyle-related diseases, but cannot exclude residual confounding.
- Finally, the data did not contain information on the quality and compliance with oral anticoagulant therapy.

## INTRODUCTION

Cardiovascular diseases are highly prevalent in patients with severe mental disorders such as schizophrenia, bipolar disease and severe depression,<sup>1</sup> contributing to a 10-20 year shorter life expectancy than the general population.<sup>2</sup> Potential explanations include a high prevalence of cardiovascular risk factors such as smoking, dyslipidemia, hypertension, diabetes, and obesity.<sup>3-5</sup> In addition, antipsychotic medications may adversely affect cardiovascular disease risk via metabolic pathways involving dyslipidemia, weight gain, and diabetes.<sup>6,7</sup>

Atrial fibrillation (AF) is the most common cardiac arrhythmia, affecting up to 1-2% of the population in developed countries, and confers a substantial increased risk of stroke, heart failure and death.<sup>8</sup> Despite increasing clinical and research focus on cardiovascular diseases in AF patients with mental disorders, the stroke risk in patients with mental disorders is largely unknown. Prior studies have shown that AF patients with mental disorders are less likely to start oral anticoagulant therapy (OAT) than those without,<sup>9,10</sup> and that those who receive OAT have worse anticoagulation control<sup>9,11,12</sup> and increased risk of major haemorrhage.<sup>11,13</sup> However, these studies only assessed outcomes in patients receiving OAT for at least 100-180 days, excluding patients who never initiated therapy and those who discontinued therapy shortly after initiation.<sup>11,13</sup>

We aimed to examine the prognostic importance of severe mental disorders in AF patients. In a nationwide cohort of patients with incident AF, we conceived a matched cohort study to compare the risk of stroke and fatal thromboembolic events in AF patients with a prior diagnosis of schizophrenia, severe depression or bipolar disease to matched comparison cohorts without these disorders. By sequentially adjusting for stroke risk factors, comorbidity, and use of OAT, we sought to further characterize the association between mental disorders and AF outcomes.

## METHODS

### Data sources

This cohort study linked three well-established Danish nationwide; the National Patient Register<sup>14</sup>, the National Prescription Register<sup>15</sup>, and the Civil Registration System.<sup>16</sup> The National Patient Register holds information on dates of admission and discharge, and discharge diagnoses classified according to the *International Classification of Diseases* (ICD) for more than 99% of hospital admissions in Denmark. The Prescription Registry contains data on all prescription purchases by Danish residents since 1995. Data includes the patients' civil registration number, date of dispensing, and type and quantity of drug prescribed. The Danish Person Registry holds data on sex, date of birth, vital and emigration status. The appendix provides information on codes for diagnoses and medications. The registries were linked using the unique personal civil registration number assigned to all Danish residents, allowing a true population-based study covering all 5,6 million inhabitants of Denmark during the study period. We performed all linkages within Statistics Denmark, a governmental institution that collects and processes information for statistical and scientific purposes.<sup>17</sup> The study was approved by the Danish Data Protection Agency (Record number 2012-41-0633). According to Danish law, approval from an ethics committee is not required for anonymous registry-based studies.

### Study population

We established a cohort of all patients with incident non-valvular AF, defining non-valvular AF as presence of AF, and baseline absence of mitral stenosis or mechanical heart valves. Specifically, we identified all patients discharged with a first hospital diagnosis of non-valvular AF between 2000 and 2015. We excluded patients who had not been residents in Denmark for at least 1 year before date of AF diagnosis (index date); patients with valvular AF; patients who died on the day of AF



1  
2  
3  
4 diagnosis; and patients with a fatal thromboembolic event defined as death within the following 30  
5  
6 days of ischemic stroke, systemic embolism, pulmonary embolism or myocardial infarction before  
7  
8 AF diagnosis. The positive predictive value (PPV) of an AF diagnosis in the National Patient  
9  
10 Register is 95% (95% CI 89-98).<sup>18</sup>  
11  
12

### 13 14 15 **Exposure**

16  
17 Through the National Patient Register, we identified all patients in the study population with an  
18  
19 inpatient or outpatient diagnosis of schizophrenia, bipolar disease or severe depression before the  
20  
21 index date. In Denmark, these mental disorders are primarily treated in public hospitals ensuring a  
22  
23 high coverage of contacts with psychiatric disorders. The PPV of a diagnosis of mental disorders in  
24  
25 the National Patient Register is 98% (95% CI 90-99).<sup>18</sup>  
26  
27

28  
29  
30  
31 To control for confounding by reducing imbalance in the data and thereby model dependence and  
32  
33 bias, we used Coarsened Exact Matching to produce a one-to-five match of patients with  
34  
35 schizophrenia, severe depression, or bipolar disease on age, sex and calendar time (year of index  
36  
37 date) to comparison cohorts of AF patients without mental disorders.<sup>19</sup> Patients age was grouped in  
38  
39 approximately 5-year intervals based on the statistical software package Stata's (Stata Corp, version  
40  
41 14) function *cem*'s algorithm for automatic coarsening.<sup>20</sup> To evaluate the effect of matching on the  
42  
43 balance between baseline variables we estimated the absolute standardized differences before and  
44  
45 after matching.  
46  
47  
48

### 49 50 51 **Patient characteristics**

52  
53 Baseline comorbidity was defined according to medication claims within the year before the AF  
54  
55 diagnosis and/or history of primary or secondary hospital discharge diagnoses (excluding  
56  
57  
58  
59  
60

1  
2  
3  
4 emergency room diagnoses) since 1994. Comorbidity information included cardiovascular and  
5  
6 metabolic diseases, and lifestyle related diseases (e.g., alcohol-related diseases such as alcoholic  
7  
8 liver disease, and alcoholic polyneuropathy, cardiomyopathy, gastritis or myopathy, and alcohol-  
9  
10 induced pancreatitis). We further combined baseline information into the CHA<sub>2</sub>DS<sub>2</sub>VASc stroke  
11  
12 risk score<sup>21</sup> to summarize perceived stroke risk at baseline, and the HAS-BLED score<sup>22</sup> as a  
13  
14 measure of bleeding risk at baseline (see score definitions in Supplementary Table 2).  
15  
16  
17  
18  
19

### 20 **Outcomes**

21  
22 Study outcomes were ischemic stroke, hemorrhagic stroke (intracranial bleeding), and fatal  
23  
24 thromboembolic events. We derived all outcomes from hospital diagnoses in the National Patient  
25  
26 Register. Stroke diagnoses were required to be primary in-hospital codes, excluding emergency  
27  
28 room and ambulatory diagnoses, to ensure higher validity.  
29  
30  
31  
32

### 33 **Statistical analyses**

34  
35 We followed all patients from their AF diagnosis and up to five years after baseline. Follow-up was  
36  
37 censored at time of death, migration, study end (November 21, 2016), or the outcome of interest,  
38  
39 whichever came first. Patient baseline characteristics were presented as proportions for discrete  
40  
41 variables and means with standard deviations (SD) for continuous variables. Crude incidence rates  
42  
43 were calculated as number of events divided by person-time. Cumulative incidence functions (by  
44  
45 means of the Aalen-Johansen estimator), assuming death as competing risk, were used to depict risk  
46  
47 of outcome during follow-up. We assessed the association between each mental disorder and study  
48  
49 outcome using Cox Proportional hazard regression with stratification on the matched groups. To  
50  
51 assess to which extent the observed association could be explained by comorbidity and/or use of  
52  
53 OAT, we performed sequential cumulative adjustment for 1) stroke risk as summarized by  
54  
55  
56  
57  
58  
59  
60

1  
2  
3  
4 components of the CHA<sub>2</sub>DS<sub>2</sub>VASc and HAS-BLED scores, and comorbidities not included in  
5  
6 CHA<sub>2</sub>DS<sub>2</sub>VASc and HAS-BLED (chronic pulmonary disease, cancer, and venous  
7  
8 thromboembolism), and 2) use of OAT during follow-up modelled as a time-varying covariate  
9  
10 shifting from untreated to treated status at first observed prescription of any OAC. We excluded age  
11  
12 and sex in the CHA<sub>2</sub>DS<sub>2</sub>VASc and HAS-BLED scores as these were included as matching factors  
13  
14 and perfectly balanced between comparison cohorts (Supplementary Table 3). The distribution of  
15  
16 time to OAC treatment initiation was presented by cumulative incidence curves (Supplementary  
17  
18 Figure 2). Point estimates were reported with 95% confidence intervals (CI) and a p-value less than  
19  
20 0.05 was considered statistically significant.  
21  
22  
23  
24  
25  
26  
27  
28  
29  
30  
31  
32  
33  
34  
35  
36  
37  
38  
39  
40  
41  
42  
43  
44  
45  
46  
47  
48  
49  
50  
51  
52  
53  
54  
55  
56  
57  
58  
59  
60

## RESULTS

We identified 260,974 AF patients during the study period. After exclusions, the study cohort comprised 253,741 AF patients of which 534 patients had schizophrenia, 400 severe depression, and 569 bipolar disease (Supplementary Figure 1). Table 1 shows baseline characteristics according to presence and type of mental disorder. AF patients with schizophrenia were substantially younger (mean age 64.5 years) whereas the age of patients with severe depression (73.7 years) and bipolar disease (73.0 years) was comparable with patients without mental disorders (73.3 years). Baseline stroke risk appeared lower in patients with schizophrenia; mean CHA<sub>2</sub>DS<sub>2</sub>-VASc score was 2.4 versus 3.0 in patients without mental disorders. However, this was explained by the lower age of schizophrenic patients. After matching, the mean CHA<sub>2</sub>DS<sub>2</sub>-VASc score was 2.3 in AF patients without schizophrenia (Supplementary Table 3). The CHA<sub>2</sub>DS<sub>2</sub>-VASc score was 3.5 in patients with severe depression and 3.2 in patients with bipolar disease (Table 1). The higher CHA<sub>2</sub>DS<sub>2</sub>-VASc score in patients with severe depression was primarily driven by a large proportion with prior stroke (30.3% vs. 16.9% in comparisons). In comparison 14.2% of schizophrenic patients had prior stroke; they also had lower prevalence of hypertension, myocardial infarction, and peripheral arterial disease. Compared with patients with no mental disorder, the HAS-BLED score was also higher in patients with severe depression and bipolar disease whereas it was lower in patients with schizophrenia. Alcohol-related diseases were prevalent across all mental disorders, particularly for patients with schizophrenia or bipolar disease (~20% vs. 4% in comparisons). Supplemental Table 3 shows characteristics for patients with schizophrenia, severe depression, and bipolar disease and their matched comparisons.

### Ischemic stroke

Figure 1 displays cumulative incidence curves for ischemic stroke in the matched cohorts. Rates of ischemic stroke at 5 years was 1.96 events per 100 person-years in schizophrenic AF patients vs.

1  
2  
3  
4 1.37 in matched comparisons, yielding a crude HR of 1.20 (95% CI 0.76-1.87) with confidence  
5  
6 intervals including unity (Table 2). After adjustment for stroke risk as summarized by the  
7  
8 CHA<sub>2</sub>DS<sub>2</sub>-VASc and HAS-BLED scores and other comorbidities this HR was 0.98 (95% CI 0.61-  
9  
10 1.58) (Figure 2). Rates of OAT initiation in AF patients with mental disorders was substantially  
11  
12 lower than in matched comparisons (Supplementary Figure 2), and after additional adjustment for  
13  
14 OAT use during follow-up the HR of ischemic stroke was 0.91 (95% CI 0.56-1.46) (Figure 2).  
15  
16 Similarly, the crude HR of 1.20 (95% CI 0.79-1.82) at 5-years in patients with severe depression  
17  
18 was substantially attenuated by sequential adjustment for stroke risk factors, comorbidity, and OAT  
19  
20 (HR 0.93, 95% CI 0.60-1.43) (Figure 2). This pattern of diminishing HRs with sequential  
21  
22 adjustment for stroke risk factors and OAT was less evident in patients with bipolar disease in  
23  
24 whom the crude HR was 1.09 (95% CI 0.72-1.65) and the fully adjusted HR was 0.92 (95% CI  
25  
26 0.60-1.42). Thus, compared with AF patients without mental disorders, the fully adjusted HRs of  
27  
28 ischemic stroke were comparable across all mental disorders with wide CIs that crossed unity  
29  
30 (Figure 2).  
31  
32  
33  
34  
35  
36

### 37 Hemorrhagic stroke

38  
39 The cumulative incidence curves showed higher rates of hemorrhagic stroke in patients with mental  
40  
41 disorders than in their matched comparisons, in particular for patients with severe depression and  
42  
43 bipolar disease (Figure 3). At 5 years, the rate of hemorrhagic stroke was 2.61 events per 100  
44  
45 person-years in schizophrenic patients vs. 2.01 in matched comparisons (crude HR of 1.16, 95% CI  
46  
47 0.79-1.70), 4.68 per 100 person-years in patients with severe depression vs. 3.28 in matched  
48  
49 comparisons (crude HR of 1.30, 95% CI 0.93-1.82), and 3.03 vs. 2.38 in patients with bipolar  
50  
51 disease (HR of 1.18, 95% CI 0.84-1.66) (Table 2, Figure 2). Sequential adjustment for stroke risk  
52  
53 factors, comorbidity, and OAT use attenuated this association and the fully adjusted HRs of  
54  
55  
56  
57  
58  
59  
60

1  
2  
3  
4 hemorrhagic stroke were comparable with matched comparisons across all mental disorders with  
5  
6 wide CIs including unity (Figure 2).  
7  
8  
9

### 10 **Fatal thromboembolic events**

11  
12 During 5-years follow-up, 19 fatal thromboembolic events occurred in AF patients with  
13  
14 schizophrenia, 20 in patients with bipolar disease, and 11 in patients with severe depression.  
15  
16 Accordingly, rates of fatal thromboembolic events per 100 person-years was substantially lower  
17  
18 than rates of ischemic and hemorrhagic stroke; 1.43 for schizophrenia vs. 0.36 in matched  
19  
20 comparisons, 1.03 vs. 1.15 for severe depression, and 1.41 vs. 0.88 for patients with bipolar disease  
21  
22 (Table 2). Notwithstanding, due to the low rate in the matched comparisons, cumulative incidence  
23  
24 curves revealed distinct differences in rates of fatal thromboembolic events in patients with  
25  
26 schizophrenia vs. matched comparisons (Figure 4). The equivalent 5-year HR was 3.93 (95% CI  
27  
28 2.11-7.30) decreasing to 3.37 (95% CI 1.77-6.43) after adjustment for stroke risk factors,  
29  
30 comorbidity, and OAT (Figure 2). Cumulative incidence curves in patients with severe depression  
31  
32 vs. matched comparisons overlapped (crude HR of 0.82, 95% CI 0.42-1.56). After adjustment for  
33  
34 stroke risk factors, comorbidity, and OAT, the HR was 0.55 (95% CI 0.28-1.07). In patients with  
35  
36 bipolar disease the crude HR was 1.54 (95% CI 0.92-2.56) compared with matched comparisons.  
37  
38 Sequential adjustment gradually attenuated this association (HR of 1.17, 95% CI 0.69-2.00) (Figure  
39  
40  
41  
42  
43  
44  
45  
46  
47  
48  
49  
50  
51  
52  
53  
54  
55  
56  
57  
58  
59  
60 2).

## DISCUSSION

### *Principal findings*

This nationwide cohort study revealed a low prevalence of severe mental disorders among patients with incident AF in Denmark. Patients with mental disorders experience higher risk of stroke compared with matched AF patients without mental disorders, although the differences were not statistically significant. However, after sequential adjustment for stroke risk factors, comorbidity and use of OAT, stroke rates were comparable with matched comparisons, suggesting that the excess stroke risk in patients with mental disorders stem from higher prevalence of stroke risk factors and lower receipt of OAT. Few thromboembolic events occurred during follow-up. Nonetheless, we noted a substantially higher mortality after a thromboembolic event in patients with schizophrenia than in matched comparisons.

### *Strengths and limitations*

These estimates of stroke risk and thromboembolic events in AF patients are based on a nationwide cohort study conducted in a setting where virtually all medical care is provided free of charge, and with complete follow-up through nationwide registries. Nonetheless, despite universal tax-supported health care in Denmark, diagnoses in patients with mental disorders may have been underreported.<sup>23,24</sup> From the current study, we are not able to conclude whether the low prevalence of AF patients with mental disorders reflect the true picture or whether AF may be under-diagnosed in these patients. We included only patients with mental disorders recorded in the hospital register, and the prevalence is likely underestimated, mainly with regard to severe depression. However, we infer that the majority of patients with schizophrenia and bipolar disease are in contact with the psychiatric hospital system due the severity of these conditions. It is also important to note that we only had information on psychiatric admissions from 1995 onwards. Thus, patients with a diagnosis before 1995 and no recorded diagnosis thereafter would not be included in the exposed cohort. Lack

1  
2  
3  
4 of data on alcohol, smoking, exercise, and other lifestyle related risk factors associated with  
5  
6 increased risk of study outcomes is another limitation. We were able to adjust for hospital diagnoses  
7  
8 of alcohol-related conditions and many other lifestyle-related diseases including chronic pulmonary  
9  
10 disease, diabetes, liver disease, cardiovascular disease, and cancer, which were more prevalent  
11  
12 among patients with mental disorders. Nonetheless, incomplete control for these factors likely lead  
13  
14 to residual confounding, e.g. bleeding risk due to alcohol abuse.<sup>25,26</sup> Finally, our data did not contain  
15  
16 information on the quality and compliance with OAT, which may be lower among patients with  
17  
18 mental disorders due to cognitive limitations and maladaptive behaviours.<sup>27</sup>  
19  
20  
21  
22  
23

#### 24 *Comparison with other studies*

25  
26 Our findings are concordant with two prior studies on outcomes of AF patients with mental  
27  
28 disorders receiving warfarin.<sup>11,13</sup> In a US cohort study of 9,345 Medicaid recipients receiving two or  
29  
30 more warfarin prescriptions less than 100 days apart, Schauer et al<sup>13</sup> demonstrated HRs of 1.36  
31  
32 (95% CI 1.06-1.74) for ischemic stroke and 1.46 (95% CI 1.04-2.05) for hemorrhagic stroke in  
33  
34 patients with mental disorders illnesses compared with patients without. In another US cohort study,  
35  
36 Paradise et al<sup>11</sup> showed that mental disorders was associated with an increased risk of major  
37  
38 bleeding (HR:1.19, 95% CI 1.11-1.27) in patients with any mental disorder vs. propensity matched  
39  
40 comparisons in 103,897 patients receiving warfarin for at least 6 months through the Veterans  
41  
42 Health Administration. Both studies only included patients who were considered appropriate for  
43  
44 OAT and who actually received it and remained successfully on treatment for an extended period.  
45  
46  
47 Thus, these results may not reflect stroke risk in all patients with mental disorders.  
48  
49  
50  
51  
52

53 Our findings expand prior studies by including all AF patients regardless of OAT use. We saw a  
54  
55 noticeable lower rate of OAT initiation in patients with mental disorders compared with matched  
56  
57  
58  
59  
60



1  
2  
3  
4 comparisons, which is in line with prior studies showing that AF patient with mental disorders are  
5  
6 less likely to receive OAT.<sup>9,10</sup> Schmitt et al<sup>10</sup> found that AF patients with mental disorders had  
7  
8 higher prevalence of stroke risk factors and contraindications to OAT. Thus, lower treatment rates  
9  
10 in patients with mental disorders may reflect appropriate attention to bleeding risk. On the other  
11  
12 hand, when restricting to patients eligible for OAT, patients with mental disorders remained less  
13  
14 likely to receive OAT.<sup>10</sup> As the higher stroke rates in our study appeared to be due to differences in  
15  
16 stroke risk factors, comorbidity, and receipt of OAT, any disparities in the care of AF patients with  
17  
18 mental disorders requires close attention. Other studies have shown that patients with mental  
19  
20 disorders have worse OAT control.<sup>9,11,12</sup> Walker et al<sup>9</sup> found that when prescribed warfarin, AF  
21  
22 patients with mental disorders were substantially more likely to have highly supra-therapeutic  
23  
24 International Normalized Ratio (INR) values than those without mental disorders (27.3% vs. 1.6%  
25  
26 had at least one INR measurement above 5.0). However, this assessment was based on a sub-cohort  
27  
28 of only 84 AF patients and should be interpreted with caution.  
29  
30  
31  
32  
33  
34

35 The higher mortality within the 30-days following a thromboembolic event in patients with  
36  
37 schizophrenia is of concern and emphasizes the need for vigilant follow-up in this patient  
38  
39 population. The finding is in line with prior studies reporting increased cardiac mortality in patients  
40  
41 with schizophrenia.<sup>24,28</sup> Future studies are encouraged to explore potential reasons which are likely  
42  
43 multifactorial and may entail both severity of illness, comorbidity, quality of care, and factors  
44  
45 beyond patient care.<sup>29</sup>  
46  
47  
48  
49

### 50 *Conclusions*

51  
52 In conclusion, this study showed that mental disorders in patients with AF is associated with  
53  
54 increased risk of ischemic and hemorrhagic stroke. When sequentially controlling for stroke risk  
55  
56  
57  
58  
59  
60

1  
2  
3  
4 factors, comorbidity, and OAT use the hazard rates attenuated and were comparable with matched  
5  
6 comparisons, indicating that the excess stroke risk is due to a higher prevalence of stroke risk  
7  
8 factors and lower use of OAT in patients with mental disorders. Patients with schizophrenia also  
9  
10 experienced higher mortality following a thromboembolic event than matched comparisons. These  
11  
12 findings highlight the importance of close attention to stroke risk factors and potential disparities in  
13  
14 receipt of OAT in AF patients with mental disorders. Our findings also identify challenges in the  
15  
16 management of AF patients with mental disorders; the excess burden of stroke risk factors signifies  
17  
18 the need for stroke prevention whereas the high rates of hemorrhagic stroke emphasize that that  
19  
20 cautious assessment of bleeding may be particularly pertinent for patients with mental disorders,  
21  
22 indicating a need for optimized coordination between specialist physical and mental health service.  
23  
24  
25  
26  
27  
28  
29  
30  
31  
32  
33  
34  
35  
36  
37  
38  
39  
40  
41  
42  
43  
44  
45  
46  
47  
48  
49  
50  
51  
52  
53  
54  
55  
56  
57  
58  
59  
60

## ACKNOWLEDGEMENTS

### Author Contributions

MS, FS and JNK had full access to all of the data in this study and take responsibility for the integrity of the data and the accuracy of the data analysis. SR, SPJ and TBL provided the idea for the study. MS, FS, TBL and SR defined the study concept and performed the critical interpretation of the data. MS drafted the article. All authors contributed critical revisions and approved the final version to be published.

### Conflicts of Interest Disclosures

Associate Professor Larsen has served as an investigator for Janssen Scientific Affairs, LLC and Boehringer Ingelheim and has served as a speaker for Bayer, BMS/Pfizer, Boehringer Ingelheim. Senior Statistician Flemming Skjøth has served as a consultant for Bayer. Other authors – none declared.

### Role of the Funders/Sponsors

The Obel Family Foundation partly funded this research by an unrestricted grant. The sponsor had no role in the design and conduct of the study; collection, management, analysis, and interpretation of the data; and preparation, review, or approval of the manuscript.

**Ethics approval:** The study was approved by the Danish Data Protection Agency (Record number 2012-41-0633).

**Data sharing statement:** No additional data are available

**REFERENCES**

1. Hert M De, Dekker JM, Wood D, Kahl KG, Holt RIG, Möller H-J. Cardiovascular disease and diabetes in people with severe mental illness position statement from the European Psychiatric Association (EPA), supported by the European Association for the Study of Diabetes (EASD) and the European Society of Cardiology (ESC). *Eur Psychiatry*; 2009;**24**:412–424.
2. Laursen TM, Munk-Olsen T, Gasse C. Chronic somatic comorbidity and excess mortality due to natural causes in persons with schizophrenia or bipolar affective disorder. *PLoS One* 2011;**6**.
3. Bresee LC, Majumdar SR, Patten SB, Johnson JA. Prevalence of cardiovascular risk factors and disease in people with schizophrenia: A population-based study. *Schizophr Res*; 2010;**117**:75–82.
4. Bernardo M, Cañas F, Banegas JR, Casademont J, Riesgo Y, Varela C, RICAVA Study Group. Prevalence and awareness of cardiovascular risk factors in patients with schizophrenia: a cross-sectional study in a low cardiovascular disease risk geographical area. *Eur Psychiatry* 2009;**24**:431–441.
5. Osborn DPJ, Wright CA, Levy G, King MB, Deo R, Nazareth I. Relative risk of diabetes, dyslipidaemia, hypertension and the metabolic syndrome in people with severe mental illnesses: systematic review and metaanalysis. *BMC Psychiatry* 2008;**8**:84.
6. Correll CU, Detraux J, Lepeleire J De, Hert M De. Effects of antipsychotics, antidepressants and mood stabilizers on risk for physical diseases in people with schizophrenia, depression and bipolar disorder. *World Psychiatry* 2015;**14**:119–136.
7. Wang J, Liu Y, Zhu W, Zhang F, Zhou Z. Olanzapine-induced weight gain plays a key role in the potential cardiovascular risk: evidence from heart rate variability analysis. *Sci Rep* 2014;**4**:7394.

- 1  
2  
3  
4 8. Kirchhof P, Benussi S, Kotecha D, et al. 2016 ESC Guidelines for the management of  
5 atrial fibrillation developed in collaboration with EACTS. *Europace* 2016;**18**:1609–1678.  
6  
7
- 8  
9 9. Walker GA, Heidenreich PA, Phibbs CS, Go AS, Chiu VY, Schmitt SK, Ananth L,  
10 Frayne SM. Mental illness and warfarin use in atrial fibrillation. *Am J Manag Care* 2011;**17**:617–  
11  
12 624.  
13
- 14  
15 10. Schmitt SK, Turakhia MP, Phibbs CS, et al. Anticoagulation in atrial fibrillation:  
16 impact of mental illness. *Am J Manag Care* 2015;**21**:e609–e617.  
17  
18
- 19  
20 11. Paradise HT, Berlowitz DR, Ozonoff A, et al. Outcomes of anticoagulation therapy in  
21 patients with mental health conditions. *J Gen Intern Med* 2014;**29**:855–861.  
22  
23
- 24  
25 12. Rose AJ, Hylek EM, Ozonoff A, Ash AS, Reisman JI, Berlowitz DR. Patient  
26 characteristics associated with oral anticoagulation control: Results of the Veterans AffaiRs Study  
27 to Improve Anticoagulation (VARIA). *J Thromb Haemost* 2010;**8**:2182–2191.  
28  
29
- 30  
31 13. Schauer DP, Moomaw CJ, Wess M, Webb T, Eckman MH. Psychosocial risk factors  
32 for adverse outcomes in patients with nonvalvular atrial fibrillation receiving warfarin. *J Gen Intern*  
33  
34  
35  
36 *Med* 2005;**20**:1114–1119.
- 37  
38 14. Schmidt M, Schmidt SSAJ, Sandegaard JIJ, Ehrenstein V, Pedersen L, Sørensen HT.  
39 The Danish National Patient Registry: a review of content, data quality, and research potential. *Clin*  
40  
41  
42  
43 *Epidemiol* 2015;**7**:449–490.
- 44  
45 15. Pottegård A, Schmidt SAJ, Wallach-Kildemoes H, Sørensen HT, Hallas J, Schmidt M.  
46 Data Resource Profile: The Danish National Prescription Registry. *Int J Epidemiol* 2016;dyw213.  
47  
48
- 49  
50 16. Schmidt M, Pedersen L, Sørensen HT. The Danish Civil Registration System as a tool  
51 in epidemiology. *Eur J Epidemiol* 2014;**29**:541–549.  
52  
53  
54  
55  
56  
57  
58  
59  
60

- 1  
2  
3  
4 17. Thygesen LC, Daasnes C, Thaulow I, Brønnum-Hansen H. Introduction to Danish  
5 (nationwide) registers on health and social issues: structure, access, legislation, and archiving.  
6  
7  
8  
9 *Scand J Public Health* 2011;**39**:12–16.
- 10  
11 18. Sundbøll J, Adelborg K, Munch T, et al. Positive predictive value of cardiovascular  
12 diagnoses in the Danish National Patient Registry: a validation study. *BMJ Open* 2016;**6**:e012832.
- 13  
14 19. Iacus SM, King G, Porro G. Matching for causal inference without balance checking.  
15  
16  
17 *Available SSRN 1152391* 2008;1–17.
- 18  
19 20. Blackwell M, Iacus S, King G, Porro G. Cem: Coarsened exact matching in Stata.  
20  
21  
22 *Stata J* 2009;**9**:524–546.
- 23  
24 21. Lip GYH, Nieuwlaat R, Pisters R, Lane DA, Crijns HJGM. Refining clinical risk  
25 stratification for predicting stroke and thromboembolism in atrial fibrillation using a novel risk  
26 factor-based approach: the euro heart survey on atrial fibrillation. *Chest* 2010;**137**:263–272.
- 27  
28 22. Pisters R, Lane DA, Nieuwlaat R, Vos CB de, Crijns HJGM, Lip GYH. A novel user-  
29 friendly score (HAS-BLED) to assess 1-year risk of major bleeding in patients with atrial  
30 fibrillation: the Euro Heart Survey. *Chest* 2010;**138**:1093–1100.
- 31  
32 23. Laursen TM, Munk-Olsen T, Agerbo E, Gasse C, Mortensen PB. Somatic hospital  
33 contacts, invasive cardiac procedures, and mortality from heart disease in patients with severe  
34 mental disorder. *Arch Gen Psychiatry* 2009;**66**:713–720.
- 35  
36 24. Crump C, Winkleby M a, Sundquist K, Sundquist J. Comorbidities and mortality in  
37 persons with schizophrenia: a Swedish national cohort study. *Am J Psychiatry* 2013;**170**:324–333.
- 38  
39 25. Roth JA, Bradley K, Thummel KE, Veenstra DL, Boudreau D. Alcohol misuse,  
40 genetics, and major bleeding among warfarin therapy patients in a community setting.  
41  
42  
43  
44  
45  
46  
47  
48  
49  
50  
51  
52  
53  
54  
55  
56  
57  
58  
59  
60 *Pharmacoepidemiol Drug Saf* 2015;**24**:619–627.

- 1  
2  
3  
4 26. Sandén P, Renlund H, Svensson PJ, Själander A. Bleeding complications in venous  
5 thrombosis patients on well-managed warfarin. *J Thromb Thrombolysis* 2016;**41**:351–358.  
6  
7  
8 27. Lawrence D, Kisely S. Inequalities in healthcare provision for people with severe  
9 mental illness. *J Psychopharmacol* 2010;**24**:61–68.  
10  
11 28. Olfson M, Gerhard T, Huang C, Crystal S, Stroup TS. Premature Mortality Among  
12 Adults With Schizophrenia in the United States. *JAMA psychiatry* 2015;**72**:1172–1181.  
13  
14 29. Ringen PA, Engh JA, Birkenaes AB, Dieset I, Andreassen OA. Increased mortality in  
15 schizophrenia due to cardiovascular disease - a non-systematic review of epidemiology, possible  
16 causes and interventions. *Front Psychiatry* 2014;**5**:1–11.  
17  
18  
19  
20  
21  
22  
23  
24  
25  
26  
27  
28  
29  
30  
31  
32  
33  
34  
35  
36  
37  
38  
39  
40  
41  
42  
43  
44  
45  
46  
47  
48  
49  
50  
51  
52  
53  
54  
55  
56  
57  
58  
59  
60

## FIGURE LEGENDS

**Figure 1.** Cumulative incidence of ischemic stroke in patients with atrial fibrillation and mental disorders and matched atrial fibrillation patients without mental disorders.

**Figure 2.** Crude and adjusted hazard ratios (HR) with 95% confidence intervals (CI) for ischemic stroke, hemorrhagic stroke, and fatal thromboembolic events in atrial fibrillation patients with severe mental disorders compared with matched atrial fibrillation patients without mental disorders.

**Figure 3.** Cumulative incidence of hemorrhagic stroke in patients with atrial fibrillation and mental disorders and matched atrial fibrillation patients without mental disorder.

**Figure 4.** Cumulative incidence of fatal thromboembolic events in patients with atrial fibrillation and mental disorders and matched atrial fibrillation patients without mental disorder.



Table 1. Descriptive characteristics of patients with incident atrial fibrillation in Denmark according to presence of mental health disorders.

| Characteristic, % (N)                                 | No mental disorder (N=252,238) | Schizophrenia (N=534) | Severe depression (N=400) | Bipolar disease (N=569) |
|-------------------------------------------------------|--------------------------------|-----------------------|---------------------------|-------------------------|
| Demographic characteristics                           |                                |                       |                           |                         |
| Females                                               | 46.7 (117,876)                 | 45.7 (244)            | 61.8 (247)                | 59.6 (339)              |
| Mean age (SD)                                         | 73.3 (13.1)                    | 64.5 (13.7)           | 73.7 (14.0)               | 73.0 (11.2)             |
| Stroke risk factors and comorbidity                   |                                |                       |                           |                         |
| Mean CHA <sub>2</sub> DS <sub>2</sub> VASc score (SD) | 3.0 (1.8)                      | 2.4 (1.7)             | 3.5 (1.9)                 | 3.2 (1.7)               |
| Mean HASBLED score (SD)                               | 2.3 (1.3)                      | 2.0 (1.4)             | 2.7 (1.5)                 | 2.6 (1.4)               |
| Prior stroke                                          | 16.9 (42,585)                  | 14.2 (76)             | 30.3 (121)                | 20.2 (115)              |
| Heart failure                                         | 17.0 (42,910)                  | 23.4 (125)            | 20.3 (81)                 | 21.1 (120)              |
| Hypertension                                          | 42.6 (107,332)                 | 26.6 (142)            | 44.5 (178)                | 36.6 (208)              |
| Myocardial infarction                                 | 10.3 (26,089)                  | 8.2 (44)              | 11.3 (45)                 | 9.3 (53)                |
| Peripheral arterial disease                           | 7.6 (19,266)                   | 6.7 (36)              | 10.0 (40)                 | 9.0 (51)                |
| Diabetes                                              | 12.9 (32,606)                  | 24.3 (130)            | 15.8 (63)                 | 20.2 (115)              |
| Prior bleeding                                        | 26.4 (66,694)                  | 28.1 (150)            | 44.0 (176)                | 37.6 (214)              |
| Renal dysfunction                                     | 5.2 (13,003)                   | 10.1 (54)             | 8.5 (34)                  | 15.8 (90)               |
| Prior venous thromboembolism                          | 4.8 (12,081)                   | 7.3 (39)              | 10.8 (43)                 | 10.0 (57)               |
| Chronic pulmonary disease                             | 14.5 (36,615)                  | 28.7 (153)            | 22.3 (89)                 | 30.8 (175)              |
| Cancer                                                | 15.9 (40,171)                  | 12.9 (69)             | 14.8 (59)                 | 17.0 (97)               |
| Alcohol-related disease                               | 4.2 (10,471)                   | 19.1 (102)            | 11.0 (44)                 | 20.9 (119)              |
| Medication use within 365 days before index date      |                                |                       |                           |                         |
| Coumarin                                              | 14.4 (36,326)                  | 5.1 (27)              | 8.8 (35)                  | 12.1 (69)               |
| NOAC                                                  | 2.5 (6,347)                    | 3.4 (18)              | 2.3 (9)                   | 2.3 (13)                |
| Aspirin                                               | 37.6 (94,951)                  | 33.0 (176)            | 40.5 (162)                | 38.1 (217)              |
| Clopidogrel                                           | 4.3 (10,936)                   | 5.6 (30)              | 9.0 (36)                  | 5.6 (32)                |
| NSAID                                                 | 26.7 (67,468)                  | 25.1 (134)            | 27.3 (109)                | 25.0 (142)              |

---

|                             |               |            |            |            |
|-----------------------------|---------------|------------|------------|------------|
| Digoxin                     | 12.4 (31,200) | 9.9 (53)   | 8.8 (35)   | 12.1 (69)  |
| Non-loop diuretics          | 36.2 (91,336) | 25.1 (134) | 38.8 (155) | 34.4 (196) |
| Loop-diuretics              | 25.5 (64,337) | 34.8 (186) | 28.8 (115) | 36.0 (205) |
| Beta-blocker                | 32.2 (81,335) | 22.7 (121) | 28.0 (112) | 24.3 (138) |
| Calcium channel blocker     | 25.5 (64,355) | 17.0 (91)  | 31.0 (124) | 25.1 (143) |
| Renin-angiotensin inhibitor | 35.5 (89,621) | 23.8 (127) | 37.5 (150) | 32.0 (182) |
| Statins                     | 24.6 (62,166) | 23.2 (124) | 26.0 (104) | 27.4 (156) |

---

Abbreviations:

SD: Standard deviation

NOAC: Non-vitamin K oral anticoagulant

NSAID: Non-steroidal anti-inflammatory drugs

**Table 2.** Number of events and rates of stroke and fatal thromboembolic events at 5 years following incident atrial fibrillation.

| Characteristic                        | Patients | Ischemic stroke |      | Hemorrhagic stroke |      | Fatal thromboembolic events |      |
|---------------------------------------|----------|-----------------|------|--------------------|------|-----------------------------|------|
|                                       | N        | Events, N       | Rate | Events, N          | Rate | Events, N                   | Rate |
| Entire unmatched AF comparison cohort | 252,238  | 15,710          | 2.03 | 21,563             | 2.83 | 8,039                       | 1.00 |
| <i>Schizophrenia</i>                  |          |                 |      |                    |      |                             |      |
| Schizophrenia                         | 534      | 25              | 1.96 | 33                 | 2.61 | 19                          | 1.43 |
| Matched comparison cohort             | 2,669    | 120             | 1.37 | 174                | 2.01 | 33                          | 0.36 |
| <i>Severe depression</i>              |          |                 |      |                    |      |                             |      |
| Severe depression                     | 400      | 28              | 2.74 | 46                 | 4.68 | 11                          | 1.03 |
| Matched comparison cohort             | 2,000    | 128             | 2.15 | 191                | 3.28 | 71                          | 1.15 |
| <i>Bipolar disease</i>                |          |                 |      |                    |      |                             |      |
| Bipolar disease                       | 569      | 28              | 1.68 | 41                 | 3.03 | 20                          | 1.41 |
| Matched comparison cohort             | 2,845    | 147             | 2.04 | 205                | 2.38 | 79                          | 0.88 |

Rates are calculated as number of events divided by person-time per 100 years.

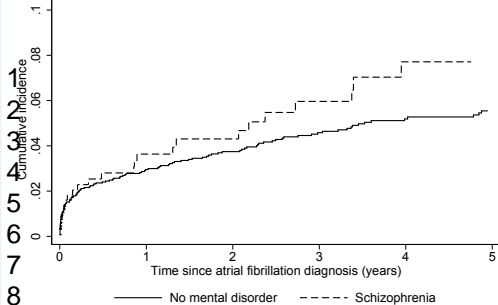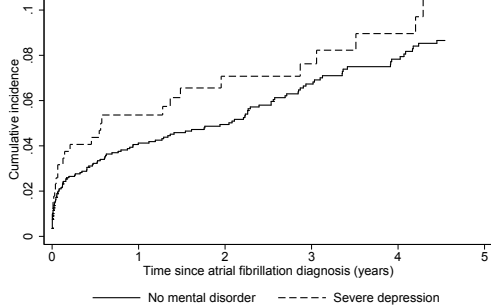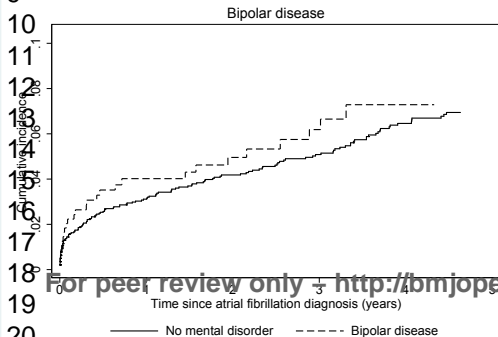

**Ischemic stroke**  
Hazard ratio (95% CI)

**BMJ Open Hemorrhagic stroke**  
Hazard ratio (95% CI)

**Fatal thromboembolic events**  
Hazard ratio (95% CI)

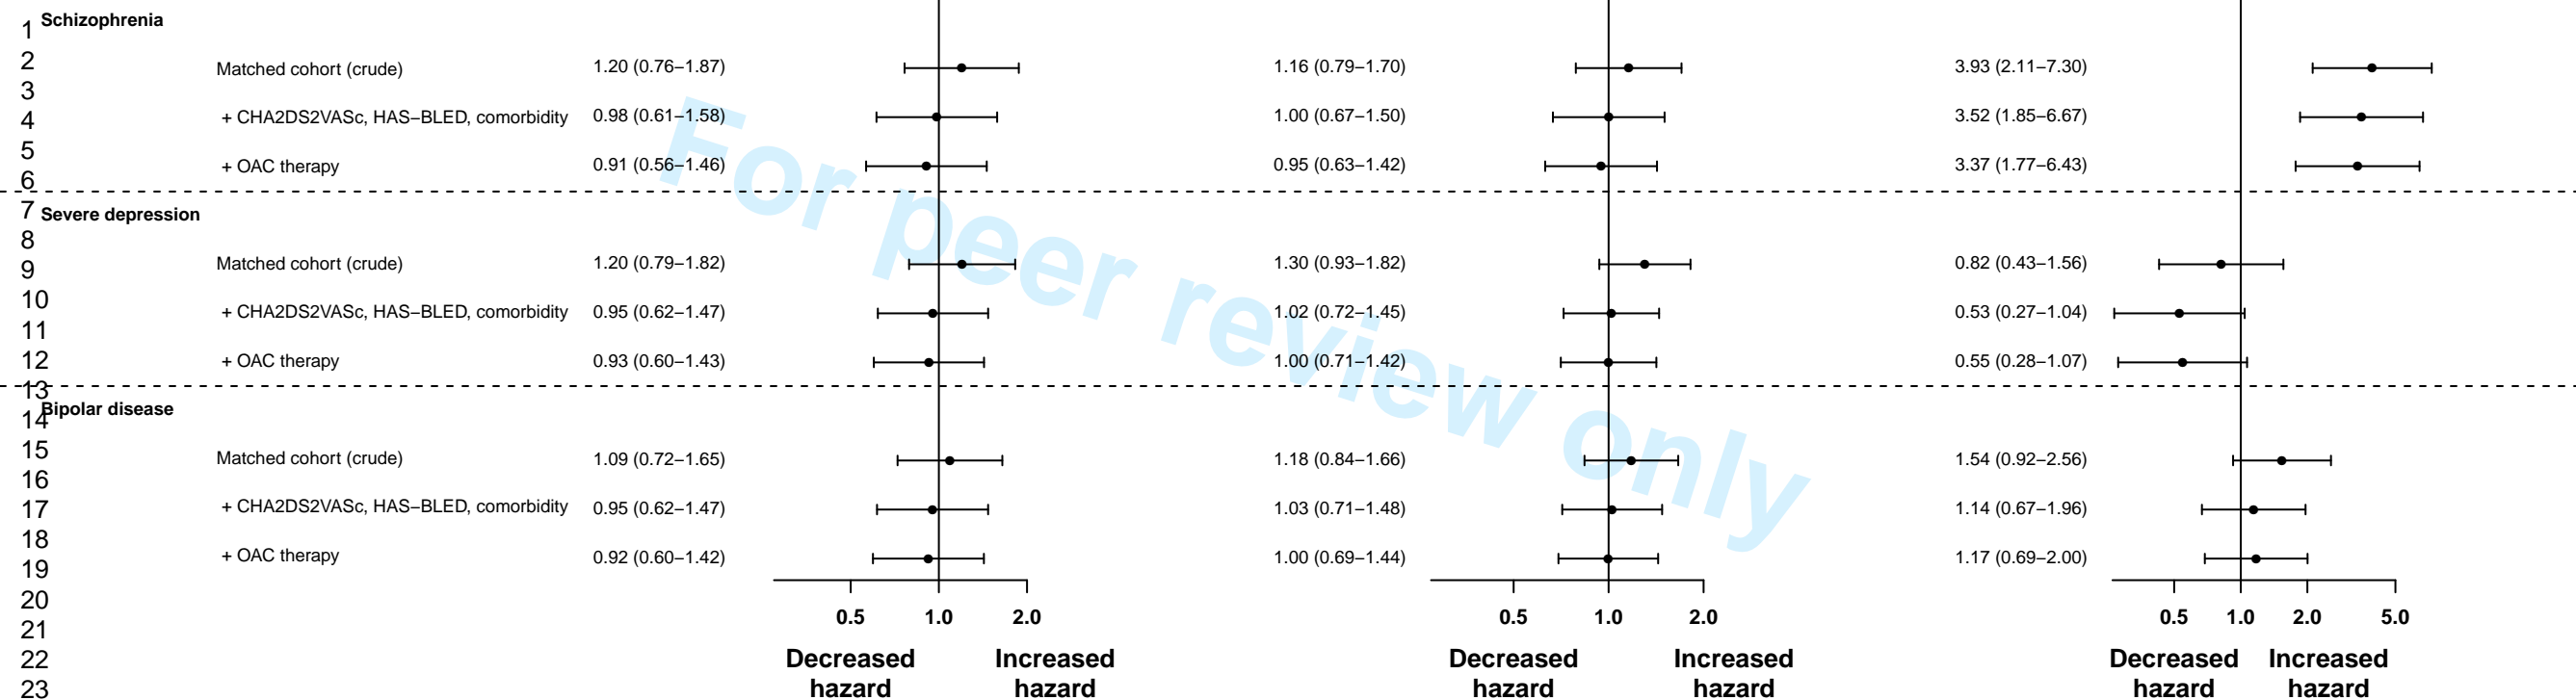

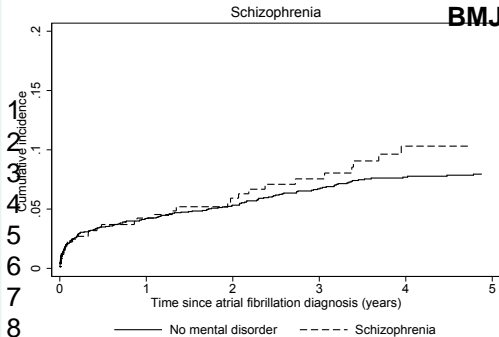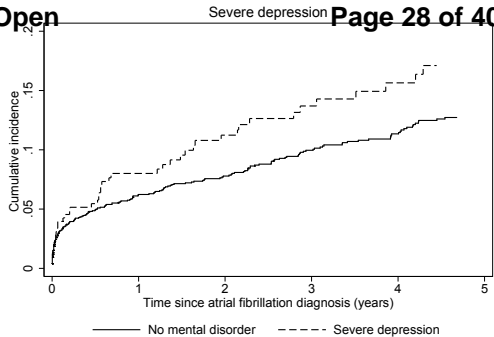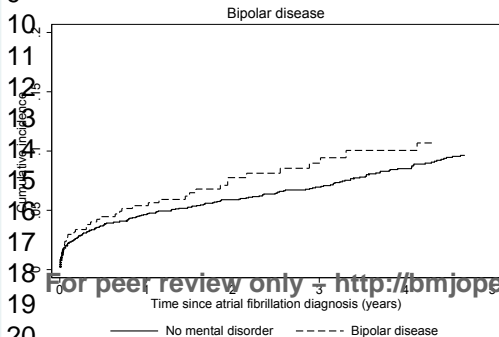

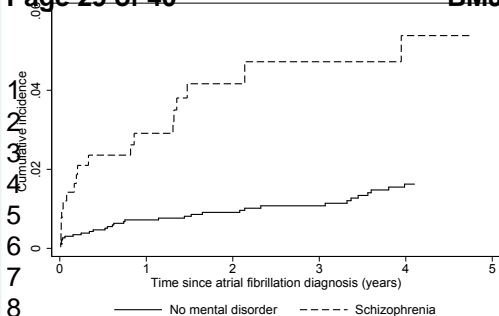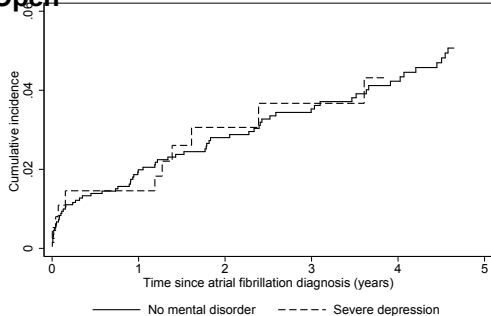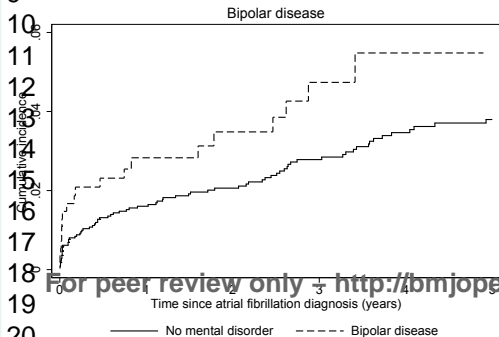

## SUPPLEMENTAL INFORMATION

### **Atrial fibrillation in patients with severe mental disorders and the risk of stroke and fatal thromboembolic events: a nationwide cohort study**

Mette Søgaard, PhD<sup>1,2</sup>, Flemming Skjøth, PhD<sup>2,3</sup>, Jette Nordstrom Kjældgaard<sup>1,2</sup>, BSCEE, Torben Bjerregaard

Larsen, PhD<sup>1,2,5</sup>, Søren Pihlkjær Hjortshøj, PhD<sup>4,5</sup>, Sam Riahi, PhD<sup>1,4,5</sup>

<sup>1</sup>Department of Cardiology, Aalborg University Hospital, Denmark

<sup>2</sup>Aalborg Thrombosis Research Unit, Department of Clinical Medicine, Faculty of Health, Aalborg University, Aalborg, Denmark

<sup>3</sup>Unit for Clinical Biostatistics, Aalborg University Hospital, Denmark

<sup>4</sup>Department of Clinical Medicine, Aalborg University, Denmark

<sup>5</sup>AF-Study group, Aalborg University Hospital, Denmark

#### **Supplementary tables and figures**

Supplementary Table 1: Definitions on comorbidity and concomitant medication according to ICD-10 codes and ATC-codes.

Supplementary Table 2: Risk score definitions

Supplementary Table 3: Descriptive characteristics of AF patients with schizophrenia, severe depression, or bipolar disease and their matched comparison cohorts.

Supplementary Figure 1: Flowchart of the study population.

Supplementary Figure 2: Cumulative incidence curves of initiation of oral anticoagulation therapy in age, sex and calendar time matched atrial fibrillation patients with and without mental disorders.



**Supplementary Table 1.** Definitions on comorbidity and concomitant medication according to ICD-10 codes and ATC-codes.

| Diagnoses                            | International Classification of Diseases 10th revision (ICD-10) code                                                           | Anatomical Therapeutic Chemical (ATC) code |
|--------------------------------------|--------------------------------------------------------------------------------------------------------------------------------|--------------------------------------------|
| Schizophrenia                        | F20                                                                                                                            |                                            |
| Bipolar disease                      | F30 F31                                                                                                                        |                                            |
| Severe depression                    | F322 F323 F332 F333                                                                                                            |                                            |
| Atrial fibrillation                  | I48                                                                                                                            |                                            |
| Ischemic stroke                      | I63 I64                                                                                                                        |                                            |
| Systemic embolism                    | I74                                                                                                                            |                                            |
| Pulmonary embolism                   | I26                                                                                                                            |                                            |
| Myocardial infarction                | I21 I23                                                                                                                        |                                            |
| Heart failure                        | I110 I130 I132 I420 I50                                                                                                        |                                            |
| Hypertension                         |                                                                                                                                | See specified definition <sup>a</sup>      |
| Peripheral vascular/ischemic disease | I702 I703 I704 I705 I706 I707<br>I708 I709 I71 I739                                                                            |                                            |
| Diabetes                             | E100 E101 E109 E110 E111 E119                                                                                                  | A10                                        |
| Prior bleeding                       | K250 K252 K254 K260 K262<br>K264 K270 K272 K274 K280<br>K282 K290 K920 K921 K922 D62<br>J942 H113 H356 H431 N02 R04<br>R31 R58 |                                            |
| Renal dysfunction                    | I12 I13 N00 N01 N02 N03 N04<br>N05 N07 N11 N14 N17 N18 N19<br>Q61                                                              |                                            |
| Prior VTE                            | I801 I802 I803 I808 I809 I819<br>I636 I676 I822 I823 I828 I829                                                                 |                                            |
| Chronic pulmonary disease            | J40 J41 J42 J43 J44 J45 J46 J47<br>J60 J61 J62 J63 J64 J65 J67 J684<br>J701 J703 J841 J920 J961 J982<br>J983                   |                                            |
| Cancer                               | C                                                                                                                              |                                            |
| Alcohol-related disease              | E224 E529A F10 G312 G621<br>G721 I426 K292 K70 K860<br>L278A O354 T51 Z714 Z721                                                |                                            |

|                                               |  |                                                                        |
|-----------------------------------------------|--|------------------------------------------------------------------------|
| Medications within 365 days before index date |  |                                                                        |
| Coumarin                                      |  | B01AA                                                                  |
| NOAC                                          |  | B01AF01 B01AF02 B01AE07                                                |
| Aspirin                                       |  | B01AC06                                                                |
| Clopidogrel                                   |  | B01AC04                                                                |
| NSAID                                         |  | M01A                                                                   |
| Digoxin                                       |  | C01AA05                                                                |
| Non-loop diuretics                            |  | C02DA C02L C03A C03B C03D C03E C03X C07C C07D C08G C09BA C09DA C09XA52 |
| Loop-diuretics                                |  | C03C                                                                   |
| Beta-blocker                                  |  | C07                                                                    |
| Calcium channel blocker                       |  | C07F C08 C09BB C09DB                                                   |
| Renin-angiotensin inhibitor                   |  | C09                                                                    |
| Statins                                       |  | C10                                                                    |

Abbreviations: VTE, venous thromboembolism; NOAC, Non-vitamin K oral anticoagulant; NSAID, Non-steroidal anti-inflammatory drugs.

<sup>a</sup>We identified subjects with hypertension from combination treatment with at least two of the following classes of antihypertensive drugs:

I· Alpha adrenergic blockers (C02A, C02B, C02C)

II· Non-loop diuretics (C02DA, C02L, C03A, C03B, C03D, C03E, C03X, C07C, C07D, C08G, C09BA, C09DA, C09XA52)

III· Vasodilators (C02DB, C02DD, C02DG, C04, C05)

IV· Beta blockers (C07)

V· Calcium channel blockers (C07F, C08, C09BB, C09DB)

VI· Renin-angiotensin system inhibitors (C09)

**Supplementary Table 2.** Risk score definitions.

| Risk score                                                                              | Points<br>if present |
|-----------------------------------------------------------------------------------------|----------------------|
| <b>CHA<sub>2</sub>DS<sub>2</sub>VASc<sup>a</sup></b>                                    |                      |
| Congestive heart failure or Left Ventricular Dysfunction                                | 1                    |
| Hypertension                                                                            | 1                    |
| Age $\geq$ 65 years                                                                     | 1                    |
| Age $\geq$ 75 years                                                                     | 1                    |
| Diabetes mellitus                                                                       | 1                    |
| Stroke (ischemic stroke, transient ischemic disease or systemic embolism)               | 2                    |
| Vascular disease (myocardial infarction, peripheral arterial disease, or aortic plaque) | 1                    |
| Sex category (female)                                                                   | 1                    |
| <b>HAS-BLED<sup>b</sup></b>                                                             |                      |
| Hypertension                                                                            | 1                    |
| Abnormal renal function                                                                 | 1                    |
| Abnormal hepatic function                                                               | 1                    |
| Stroke (ischemic stroke or transient ischemic attack)                                   | 1                    |
| Bleeding                                                                                | 1                    |
| Labile international normalized ratio <sup>c</sup>                                      | 1                    |
| Elderly age ( $\geq$ 65 years)                                                          | 1                    |
| Drugs (aspirin, clopidogrel, or non-steroidal anti-inflammatory drugs)                  | 1                    |
| Alcohol intake                                                                          | 1                    |

<sup>a</sup>Reflects stroke risk in atrial fibrillation patients not in anticoagulant therapy (Lip GYH, Nieuwlaat R, Pisters R, Lane DA, Crijns HJGM. Refining clinical risk stratification for predicting stroke and thromboembolism in atrial fibrillation using a novel risk factor-based approach: the euro heart survey on atrial fibrillation. Chest 2010;137(2):263-72)

<sup>b</sup>Reflects bleeding risk in atrial fibrillation patients undergoing anticoagulant therapy (Pisters R, Lane DA, Nieuwlaat R, de Vos CB, Crijns HJGM, Lip GYH. A novel user-friendly score (HAS-BLED) to assess 1-year risk of major bleeding in patients with atrial fibrillation: the Euro Heart Survey. Chest 2010;138(5):1093-100).

<sup>c</sup>Not included due to unavailable information

Supplementary Figure 1. Flowchart of the study population.

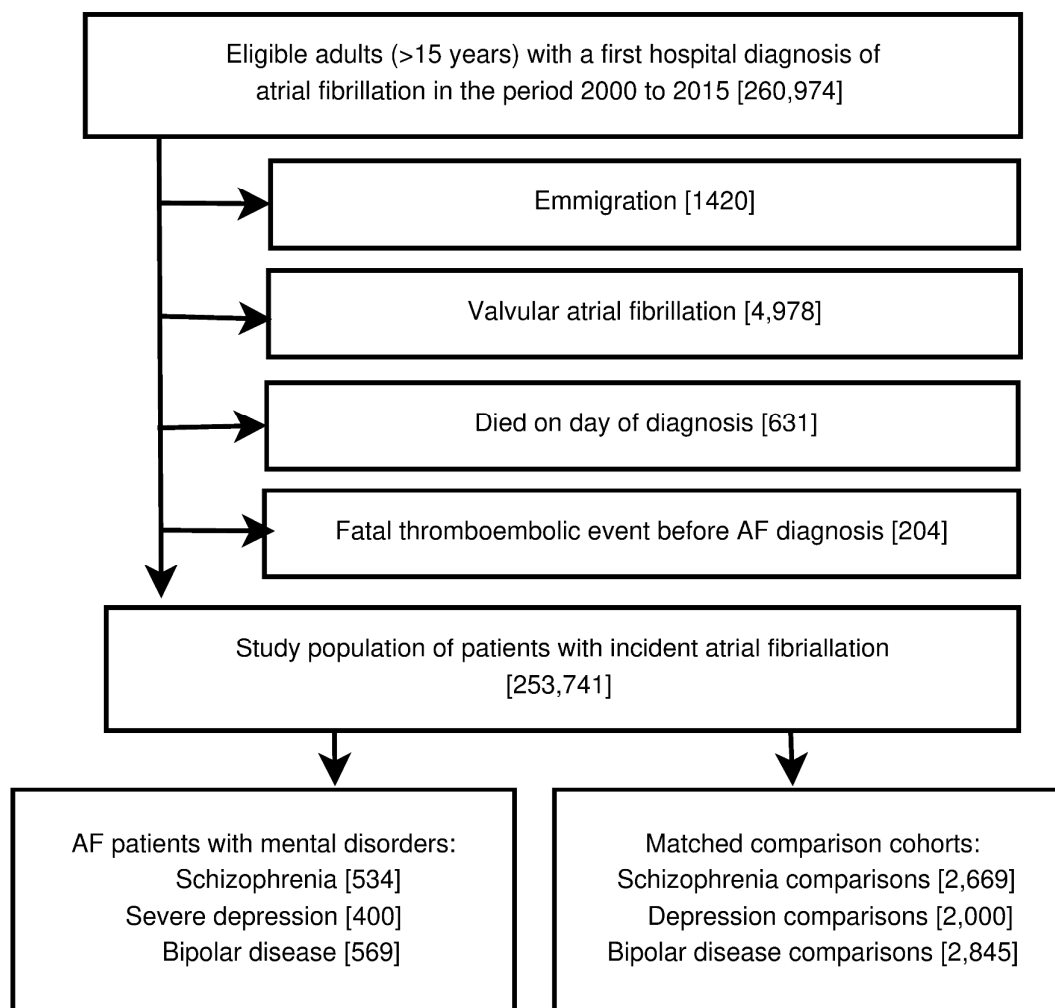

**Supplementary Table 3.** Descriptive characteristics of AF patients with schizophrenia, severe depression, or bipolar disease and their matched comparison cohorts.

| Characteristic, % (N)                                 | Schizophrenia          |               | Severe depression      |                   | Bipolar disease        |                 |
|-------------------------------------------------------|------------------------|---------------|------------------------|-------------------|------------------------|-----------------|
|                                                       | Matched AF comparisons | Schizophrenia | Matched AF comparisons | Severe depression | Matched AF comparisons | Bipolar disease |
| Total number                                          | 2,669                  | 534           | 2,000                  | 400               | 2,845                  | 569             |
| Females                                               | 45.7 (1,219)           | 45.7 (244)    | 61.8 (1,235)           | 61.8 (247)        | 59.6 (1,695)           | 59.6 (339)      |
| Mean age (SD)                                         | 64.6 (13.8)            | 64.5 (13.7)   | 73.5 (14.0)            | 73.7 (14.0)       | 73.0 (11.2)            | 73.0 (11.2)     |
| Mean CHA <sub>2</sub> DS <sub>2</sub> VASc score (SD) | 2.3 (1.8)              | 2.4 (1.7)     | 3.2 (1.8)              | 3.5 (1.9)         | 3.1 (1.7)              | 3.2 (1.7)       |
| Mean HASBLED score (SD)                               | 1.9 (1.4)              | 2.0 (1.4)     | 2.3 (1.4)              | 2.7 (1.5)         | 2.3 (1.3)              | 2.6 (1.4)       |
| Prior stroke                                          | 13.5 (361)             | 14.2 (76)     | 17.4 (347)             | 30.3 (121)        | 15.4 (439)             | 20.2 (115)      |
| Heart failure                                         | 14.1 (375)             | 23.4 (125)    | 16.8 (335)             | 20.3 (81)         | 15.8 (449)             | 21.1 (120)      |
| Hypertension                                          | 39.6 (1,057)           | 26.6 (142)    | 42.5 (850)             | 44.5 (178)        | 46.9 (1,334)           | 36.6 (208)      |
| Myocardial infarction                                 | 8.9 (237)              | 8.2 (44)      | 10.3 (206)             | 11.3 (45)         | 9.9 (282)              | 9.3 (53)        |
| Peripheral arterial disease                           | 6.4 (171)              | 6.7 (36)      | 8.4 (168)              | 10.0 (40)         | 7.7 (218)              | 9.0 (51)        |
| Diabetes                                              | 12.8 (342)             | 24.3 (130)    | 13.1 (261)             | 15.8 (63)         | 13.5 (384)             | 20.2 (115)      |
| Prior bleeding                                        | 21.0 (560)             | 28.1 (150)    | 27.1 (543)             | 44.0 (176)        | 25.0 (710)             | 37.6 (214)      |
| Renal dysfunction                                     | 4.5 (119)              | 10.1 (54)     | 5.4 (108)              | 8.5 (34)          | 4.7 (133)              | 15.8 (90)       |
| Prior venous thromboembolism                          | 4.6 (124)              | 7.3 (39)      | 4.6 (92)               | 10.8 (43)         | 5.8 (165)              | 10.0 (57)       |
| Chronic pulmonary disease                             | 12.9 (343)             | 28.7 (153)    | 15.6 (311)             | 22.3 (89)         | 15.6 (444)             | 30.8 (175)      |
| Cancer                                                | 12.5 (334)             | 12.9 (69)     | 17.8 (355)             | 14.8 (59)         | 16.8 (477)             | 17.0 (97)       |
| Alcohol-related disease                               | 5.2 (138)              | 19.1 (102)    | 3.8 (75)               | 11.0 (44)         | 3.9 (112)              | 20.9 (119)      |

|                             |            |            |            |            |             |            |
|-----------------------------|------------|------------|------------|------------|-------------|------------|
| Coumarin                    | 14.8 (394) | 5.1 (27)   | 13.1 (262) | 8.8 (35)   | 14.2 (403)  | 12.1 (69)  |
| NOAC                        | 3.0 (81)   | 3.4 (18)   | 3.0 (60)   | 2.3 (9)    | 3.7 (106)   | 2.3 (13)   |
| Aspirin                     | 29.6 (791) | 33.0 (176) | 39.2 (784) | 40.5 (162) | 35.9 (1021) | 38.1 (217) |
| Clopidogrel                 | 4.5 (121)  | 5.6 (30)   | 5.5 (110)  | 9.0 (36)   | 5.2 (147)   | 5.6 (32)   |
| NSAID                       | 26.5 (707) | 25.1 (134) | 26.4 (529) | 27.3 (109) | 27.3 (776)  | 25.0 (142) |
| Digoxin                     | 8.2 (220)  | 9.9 (53)   | 10.2 (204) | 8.8 (35)   | 10.5 (298)  | 12.1 (69)  |
| Non-loop diuretics          | 30.3 (808) | 25.1 (134) | 36.9 (737) | 38.8 (155) | 38.9 (1107) | 34.4 (196) |
| Loop-diuretics              | 18.0 (480) | 34.8 (186) | 24.7 (494) | 28.8 (115) | 25.0 (711)  | 36.0 (205) |
| Beta-blocker                | 32.6 (870) | 22.7 (121) | 33.1 (662) | 28.0 (112) | 36.0 (1023) | 24.3 (138) |
| Calcium channel blocker     | 23.4 (625) | 17.0 (91)  | 25.2 (504) | 31.0 (124) | 26.0 (741)  | 25.1 (143) |
| Renin-angiotensin inhibitor | 34.8 (929) | 23.8 (127) | 37.6 (753) | 37.5 (150) | 39.5 (1125) | 32.0 (182) |
| Statins                     | 27.0 (721) | 23.2 (124) | 28.6 (573) | 26.0 (104) | 27.8 (790)  | 27.4 (156) |

## Abbreviations:

SD: Standard deviation

NOAC: Non-vitamin K oral anticoagulant

NSAID: Non-steroidal anti-inflammatory drugs

1  
2  
3  
4  
5  
6  
7  
8  
9  
10  
11  
12  
13  
14  
15  
16  
17  
18  
19  
20  
21  
22  
23  
24  
25  
26  
27  
28  
29  
30  
31  
32  
33  
34  
35  
36  
37  
38  
39  
40  
41  
42  
43  
44  
45  
46  
47  
48  
49

**Supplementary Figure 2.** Cumulative incidence curves of initiation of oral anticoagulation therapy in age, sex and calendar time matched atrial fibrillation patients with and without mental disorders.

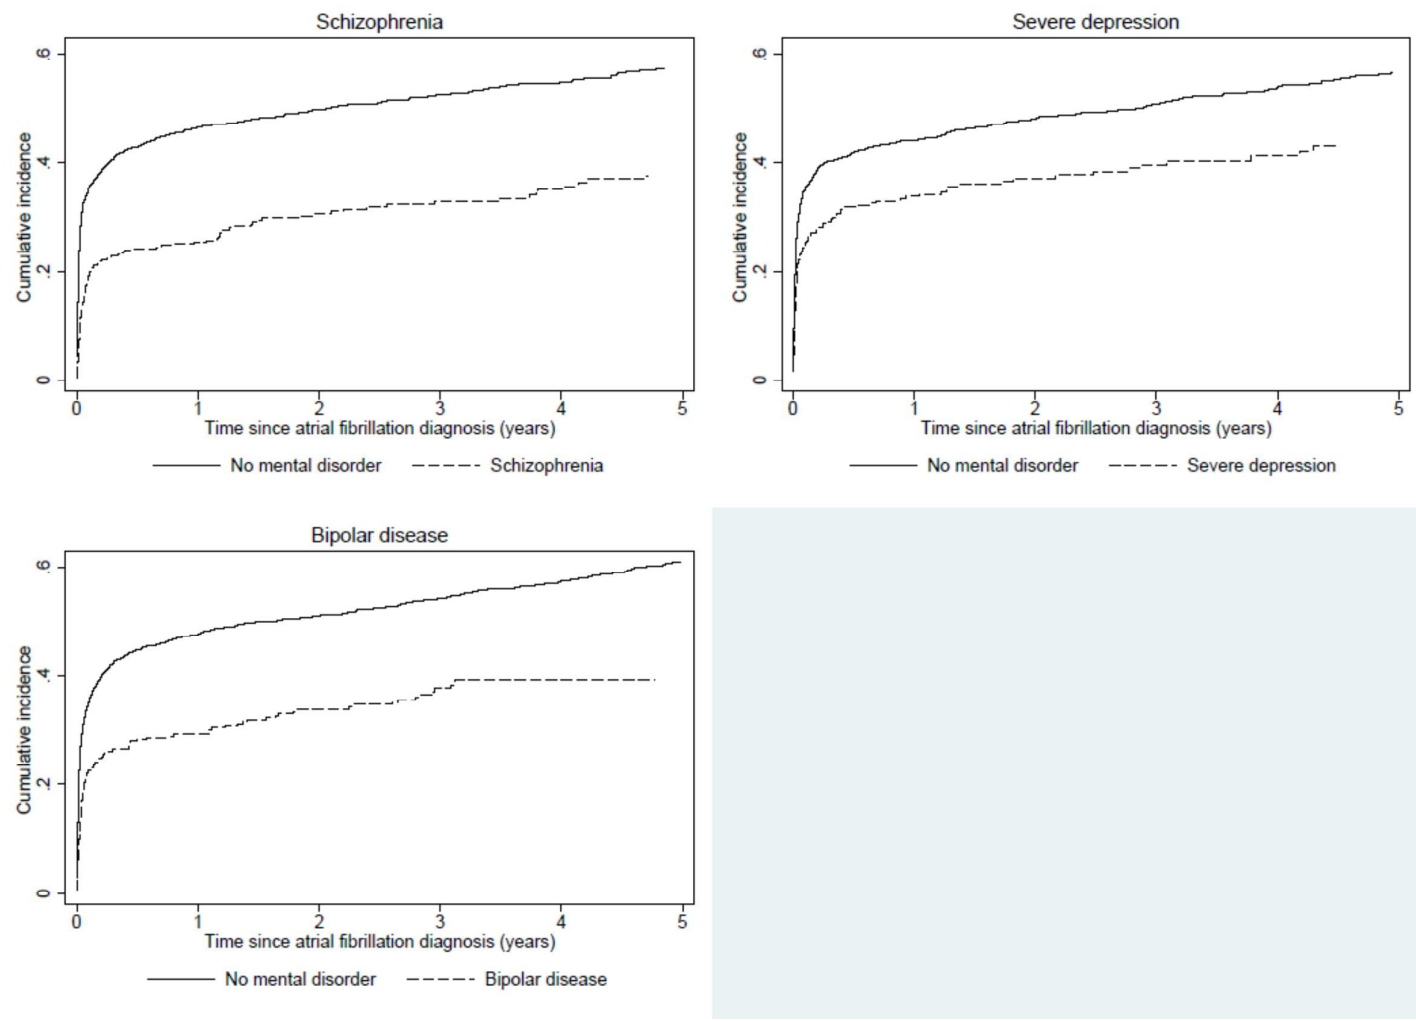

## STROBE (Strengthening The Reporting of OBServational Studies in Epidemiology) Checklist

A checklist of items that should be included in reports of observational studies. You must report the page number in your manuscript where you consider each of the items listed in this checklist. If you have not included this information, either revise your manuscript accordingly before submitting or note N/A.

**Note:** An Explanation and Elaboration article discusses each checklist item and gives methodological background and published examples of transparent reporting. The STROBE checklist is best used in conjunction with this article (freely available on the Web sites of PLoS Medicine at <http://www.plosmedicine.org/>, Annals of Internal Medicine at <http://www.annals.org/>, and Epidemiology at <http://www.epidem.com/>). Information on the STROBE Initiative is available at [www.strobe-statement.org](http://www.strobe-statement.org).

| Section and Item     | Item No. | Recommendation                                                                                                                                                                                                                                                                                                                                                                                                                                                                 | Reported on Page No. |
|----------------------|----------|--------------------------------------------------------------------------------------------------------------------------------------------------------------------------------------------------------------------------------------------------------------------------------------------------------------------------------------------------------------------------------------------------------------------------------------------------------------------------------|----------------------|
| Title and Abstract   | 1        | (a) Indicate the study's design with a commonly used term in the title or the abstract                                                                                                                                                                                                                                                                                                                                                                                         |                      |
|                      |          | (b) Provide in the abstract an informative and balanced summary of what was done and what was found                                                                                                                                                                                                                                                                                                                                                                            |                      |
| <b>Introduction</b>  |          |                                                                                                                                                                                                                                                                                                                                                                                                                                                                                |                      |
| Background/Rationale | 2        | Explain the scientific background and rationale for the investigation being reported                                                                                                                                                                                                                                                                                                                                                                                           |                      |
| Objectives           | 3        | State specific objectives, including any prespecified hypotheses                                                                                                                                                                                                                                                                                                                                                                                                               |                      |
| <b>Methods</b>       |          |                                                                                                                                                                                                                                                                                                                                                                                                                                                                                |                      |
| Study Design         | 4        | Present key elements of study design early in the paper                                                                                                                                                                                                                                                                                                                                                                                                                        |                      |
| Setting              | 5        | Describe the setting, locations, and relevant dates, including periods of recruitment, exposure, follow-up, and data collection                                                                                                                                                                                                                                                                                                                                                |                      |
| Participants         | 6        | (a) <i>Cohort study</i> —Give the eligibility criteria, and the sources and methods of selection of participants. Describe methods of follow-up<br><br><i>Case-control study</i> —Give the eligibility criteria, and the sources and methods of case ascertainment and control selection. Give the rationale for the choice of cases and controls<br><br><i>Cross-sectional study</i> —Give the eligibility criteria, and the sources and methods of selection of participants |                      |
|                      |          | (b) <i>Cohort study</i> —For matched studies, give matching criteria and number of exposed and unexposed<br><br><i>Case-control study</i> —For matched studies, give matching criteria and the number of controls per case                                                                                                                                                                                                                                                     |                      |
| Variables            | 7        | Clearly define all outcomes, exposures, predictors, potential confounders, and effect modifiers. Give diagnostic criteria, if applicable                                                                                                                                                                                                                                                                                                                                       |                      |



| Section and Item             | Item No. | Recommendation                                                                                                                                                                                                                                                                                            | Reported on Page No. |
|------------------------------|----------|-----------------------------------------------------------------------------------------------------------------------------------------------------------------------------------------------------------------------------------------------------------------------------------------------------------|----------------------|
| Data Sources/<br>Measurement | 8*       | For each variable of interest, give sources of data and details of methods of assessment (measurement). Describe comparability of assessment methods if there is more than one group                                                                                                                      |                      |
| Bias                         | 9        | Describe any efforts to address potential sources of bias                                                                                                                                                                                                                                                 |                      |
| Study Size                   | 10       | Explain how the study size was arrived at                                                                                                                                                                                                                                                                 |                      |
| Quantitative Variables       | 11       | Explain how quantitative variables were handled in the analyses. If applicable, describe which groupings were chosen and why                                                                                                                                                                              |                      |
| Statistical Methods          | 12       | (a) Describe all statistical methods, including those used to control for confounding                                                                                                                                                                                                                     |                      |
|                              |          | (b) Describe any methods used to examine subgroups and interactions                                                                                                                                                                                                                                       |                      |
|                              |          | (c) Explain how missing data were addressed                                                                                                                                                                                                                                                               |                      |
|                              |          | (d) <i>Cohort study</i> —If applicable, explain how loss to follow-up was addressed<br><i>Case-control study</i> —If applicable, explain how matching of cases and controls was addressed<br><i>Cross-sectional study</i> —If applicable, describe analytical methods taking account of sampling strategy |                      |
|                              |          | (e) Describe any sensitivity analyses                                                                                                                                                                                                                                                                     |                      |
| <b>Results</b>               |          |                                                                                                                                                                                                                                                                                                           |                      |
| Participants                 | 13*      | (a) Report numbers of individuals at each stage of study—eg numbers potentially eligible, examined for eligibility, confirmed eligible, included in the study, completing follow-up, and analysed                                                                                                         |                      |
|                              |          | (b) Give reasons for non-participation at each stage                                                                                                                                                                                                                                                      |                      |
|                              |          | (c) Consider use of a flow diagram                                                                                                                                                                                                                                                                        |                      |
| Descriptive Data             | 14*      | (a) Give characteristics of study participants (eg demographic, clinical, social) and information on exposures and potential confounders                                                                                                                                                                  |                      |
|                              |          | (b) Indicate number of participants with missing data for each variable of interest                                                                                                                                                                                                                       |                      |
|                              |          | (c) <i>Cohort study</i> —Summarise follow-up time (eg, average and total amount)                                                                                                                                                                                                                          |                      |
| Outcome Data                 | 15*      | <i>Cohort study</i> —Report numbers of outcome events or summary measures over time                                                                                                                                                                                                                       |                      |
|                              |          | <i>Case-control study</i> —Report numbers in each exposure category, or summary measures of exposure                                                                                                                                                                                                      |                      |
|                              |          | <i>Cross-sectional study</i> —Report numbers of outcome events or summary measures                                                                                                                                                                                                                        |                      |

| Section and Item         | Item No. | Recommendation                                                                                                                                                                                               | Reported on Page No. |
|--------------------------|----------|--------------------------------------------------------------------------------------------------------------------------------------------------------------------------------------------------------------|----------------------|
| Main Results             | 16       | (a) Give unadjusted estimates and, if applicable, confounder-adjusted estimates and their precision (eg, 95% confidence interval). Make clear which confounders were adjusted for and why they were included |                      |
|                          |          | (b) Report category boundaries when continuous variables were categorized                                                                                                                                    |                      |
|                          |          | (c) If relevant, consider translating estimates of relative risk into absolute risk for a meaningful time period                                                                                             |                      |
| Other Analyses           | 17       | Report other analyses done—eg analyses of subgroups and interactions, and sensitivity analyses                                                                                                               |                      |
| <b>Discussion</b>        |          |                                                                                                                                                                                                              |                      |
| Key Results              | 18       | Summarise key results with reference to study objectives                                                                                                                                                     |                      |
| Limitations              | 19       | Discuss limitations of the study, taking into account sources of potential bias or imprecision. Discuss both direction and magnitude of any potential bias                                                   |                      |
| Interpretation           | 20       | Give a cautious overall interpretation of results considering objectives, limitations, multiplicity of analyses, results from similar studies, and other relevant evidence                                   |                      |
| Generalisability         | 21       | Discuss the generalisability (external validity) of the study results                                                                                                                                        |                      |
| <b>Other Information</b> |          |                                                                                                                                                                                                              |                      |
| Funding                  | 22       | Give the source of funding and the role of the funders for the present study and, if applicable, for the original study on which the present article is based                                                |                      |

\*Give information separately for cases and controls in case-control studies and, if applicable, for exposed and unexposed groups in cohort and cross-sectional studies.

**Once you have completed this checklist, please save a copy and upload it as part of your submission. DO NOT include this checklist as part of the main manuscript document. It must be uploaded as a separate file.**

# BMJ Open

## Atrial fibrillation in patients with severe mental disorders and the risk of stroke, and fatal thromboembolic events, and bleeding: a nationwide cohort study

|                                 |                                                                                                                                                                                                                                                                                                                                                                    |
|---------------------------------|--------------------------------------------------------------------------------------------------------------------------------------------------------------------------------------------------------------------------------------------------------------------------------------------------------------------------------------------------------------------|
| Journal:                        | <i>BMJ Open</i>                                                                                                                                                                                                                                                                                                                                                    |
| Manuscript ID                   | bmjopen-2017-018209.R1                                                                                                                                                                                                                                                                                                                                             |
| Article Type:                   | Research                                                                                                                                                                                                                                                                                                                                                           |
| Date Submitted by the Author:   | 08-Sep-2017                                                                                                                                                                                                                                                                                                                                                        |
| Complete List of Authors:       | Søgaard, Mette; Aalborg University Hospital, Skjøth, Flemming; Aalborg University Hospital, Aalborg Thrombosis Research Unit<br>Kjældgaard, Jette; Aalborg University Hospital<br>Larsen, Torben; Aalborg Hospital, Department of Cardiology<br>Hjortshøj, Søren; Aalborg University Hospital, Department of Cardiology<br>Riahi, Sam; Aalborg University Hospital |
| <b>Primary Subject Heading</b>: | Cardiovascular medicine                                                                                                                                                                                                                                                                                                                                            |
| Secondary Subject Heading:      | Mental health                                                                                                                                                                                                                                                                                                                                                      |
| Keywords:                       | Atrial fibrillation, Schizophrenia & psychotic disorders < PSYCHIATRY, Depression & mood disorders < PSYCHIATRY, bipolar disease, Stroke medicine < INTERNAL MEDICINE, outcome                                                                                                                                                                                     |
|                                 |                                                                                                                                                                                                                                                                                                                                                                    |

SCHOLARONE™  
Manuscripts

Only

1  
2  
3  
4 **Atrial fibrillation in patients with severe mental disorders and the risk of stroke,**  
5  
6  
7 **fatal thromboembolic events, and bleeding: a nationwide cohort study**  
8  
9

10  
11 Mette Søgaard, PhD<sup>1,2</sup>, Flemming Skjøth, PhD<sup>2,3</sup>, Jette Nordstrom Kjældgaard<sup>1,2</sup>, BSCEE, Torben

12  
13 Bjerregaard Larsen, PhD<sup>1,2,5</sup>, Søren Pihlkjær Hjortshøj, PhD<sup>4,5</sup>, Sam Riahi, PhD<sup>1,4,5</sup>  
14  
15

16  
17  
18 <sup>1</sup>Department of Cardiology, Aalborg University Hospital, Denmark  
19

20 <sup>2</sup>Aalborg Thrombosis Research Unit, Department of Clinical Medicine, Faculty of Health, Aalborg  
21  
22 University, Aalborg, Denmark  
23

24 <sup>3</sup>Unit for Clinical Biostatistics, Aalborg University Hospital, Denmark  
25  
26

27 <sup>4</sup>Department of Clinical Medicine, Aalborg University, Denmark  
28

29 <sup>5</sup>AF-Study group, Aalborg University Hospital, Denmark  
30  
31  
32  
33  
34  
35

36 **Running title:** Atrial fibrillation outcomes in patients with severe mental disorders  
37  
38  
39  
40  
41

42 **Word count:** Abstract 298; text 3028.  
43  
44  
45  
46

47 **Corresponding author:**  
48

49 Mette Søgaard, DVM, PhD. Sønder Skovvej 15, 9000 Aalborg, Denmark.  
50

51 Phone: +4597664386; E-mail: mette.soegaard@rn.dk  
52  
53  
54  
55  
56  
57  
58  
59  
60

**ABSTRACT**

**Objectives:** Outcomes of atrial fibrillation (AF) in patients with severe mental disorders are largely unknown. We compared rates of stroke, fatal thromboembolic events, and bleeding in AF patients with and without mental disorders.

**Design:** Nationwide registry-based cohort study.

**Setting:** Denmark (population 5,6 million), 2000-2015.

**Participants:** AF patients with schizophrenia (n=534), severe depression (n=400), or bipolar disease (n=569) matched 1:5 on age, sex and calendar time to AF patients without mental disorders.

**Exposure:** Inpatient or hospital-based outpatient diagnosis of schizophrenia, severe depression or bipolar disease.

**Primary and secondary outcome measures:** Hazard ratios (HR) for stroke, fatal thromboembolic events, and major bleeding comparing patients with and without mental disorders estimated by Cox regression with sequential adjustment for risk factors for stroke and bleeding, comorbidity, and initiation of oral anticoagulant therapy (OAT).

**Results:** Compared with matched comparisons, crude 5-year HRs of ischemic stroke was 1.37 (95% confidence intervals (CI) 0.88-2.14) for schizophrenia, 1.36 (95% CI 0.89-2.08) for depression, and 1.04 (95% CI 0.69-1.56) for bipolar disease. After adjusting for risk factors, comorbidity, and OAT these HRs declined toward the null. Crude HRs of fatal thromboembolic events were 3.16 (95% CI 1.78-5.61) for schizophrenia, 1.31 (95% CI 0.67-2.56) for depression, and 1.53 (95% CI 0.93-2.53) for bipolar disease. Rates of major bleeding were increased in patients with schizophrenia (crude HRs 1.37, 95% CI 0.99-1.90) and severe depression (HR 1.25, 95% CI 0.87-1.78) but not bipolar disease (HR 0.82, 95% CI 0.58-1.15).

**Conclusion:** AF patients with schizophrenia or severe depression experienced increased rates of stroke and major bleeding compared with matched comparisons. This increase were largely

1  
2  
3  
4 explained by differences in the prevalence of risk factors for stroke and bleeding, comorbidity and  
5  
6 initiation of OAT during follow-up. AF patients with schizophrenia also experienced higher  
7  
8 mortality following thromboembolic events than matched comparisons without mental disorder.  
9  
10

11  
12 **Keywords:** Atrial fibrillation, schizophrenia, depression, bipolar disease, stroke, bleeding, outcome.  
13  
14  
15  
16  
17  
18  
19  
20  
21  
22  
23  
24  
25  
26  
27  
28  
29  
30  
31  
32  
33  
34  
35  
36  
37  
38  
39  
40  
41  
42  
43  
44  
45  
46  
47  
48  
49  
50  
51  
52  
53  
54  
55  
56  
57  
58  
59  
60

For peer review only

## STRENGTHS AND LIMITATIONS OF THIS STUDY

- The study included all patients with a hospital diagnosis of atrial fibrillation in Denmark in 2000-2015. The study had complete follow-up on all participants from the nationwide Danish Civil Registration System.
- The study was conducted in a government financed healthcare system with equal access for the entire Danish population.
- Despite equal access to tax-supported health care in Denmark, diagnoses in patients with mental disorders may have been underreported.
- The study lacked data on alcohol, smoking, exercise, and other lifestyle related risk factors associated with increased risk of study outcomes. We were able to adjust for hospital diagnoses of alcohol-related conditions and other lifestyle-related diseases, but cannot exclude residual confounding.
- Finally, the data did not contain information on the quality and compliance with oral anticoagulant therapy.

## INTRODUCTION

Cardiovascular diseases are highly prevalent in patients with severe mental disorders such as schizophrenia, bipolar disease and severe depression,<sup>1</sup> contributing to a 10-20 year shorter life expectancy than the general population.<sup>2</sup> Potential explanations include a high prevalence of cardiovascular risk factors such as smoking, dyslipidemia, hypertension, diabetes, and obesity.<sup>3-5</sup> In addition, antipsychotic medications may adversely affect cardiovascular disease risk via metabolic pathways involving dyslipidemia, weight gain, and diabetes.<sup>6,7</sup>

Atrial fibrillation (AF) is the most common cardiac arrhythmia, affecting up to 1-2% of the population in developed countries, and confers a substantial increased risk of stroke, heart failure and death.<sup>8</sup> Despite increasing clinical and research focus on cardiovascular diseases in AF patients with mental disorders, the stroke risk in patients with mental disorders is largely unknown. Prior studies have shown that AF patients with mental disorders are less likely to start oral anticoagulant therapy (OAT) than those without,<sup>9,10</sup> and that those who receive OAT have worse anticoagulation control<sup>9,11,12</sup> and increased risk of major haemorrhage.<sup>11,13</sup> However, these studies only assessed outcomes in patients receiving OAT for at least 100-180 days, excluding patients who never initiated therapy and those who discontinued therapy shortly after initiation.<sup>11,13</sup>

We aimed to examine the prognostic importance of severe mental disorders in AF patients. In a nationwide cohort of patients with incident AF, we conceived a matched cohort study to compare the risk of stroke, fatal thromboembolic events, and major bleeding in AF patients with a prior diagnosis of schizophrenia, severe depression or bipolar disease to matched comparison cohorts without these disorders. By sequentially adjusting for stroke risk factors, bleeding risk factors, comorbidity, and use of OAT, we sought to further characterize the association between mental disorders and AF outcomes.



## METHODS

### Data sources

This cohort study linked three well-established Danish nationwide; the National Patient Register<sup>14</sup>, the National Prescription Register<sup>15</sup>, and the Civil Registration System.<sup>16</sup> The National Patient Register holds information on dates of admission and discharge, and discharge diagnoses classified according to the *International Classification of Diseases* (ICD) for more than 99% of hospital admissions in Denmark. The Prescription Registry contains data on all prescription purchases by Danish residents since 1995. Data includes the patients' civil registration number, date of dispensing, and type and quantity of drug prescribed. The Danish Person Registry holds data on sex, date of birth, vital and emigration status. The appendix provides information on codes for diagnoses and medications. The registries were linked using the unique personal civil registration number assigned to all Danish residents, allowing a true population-based study covering all 5,6 million inhabitants of Denmark during the study period. We performed all linkages within Statistics Denmark, a governmental institution that collects and processes information for statistical and scientific purposes.<sup>17</sup> The study was approved by the Danish Data Protection Agency (Record number 2012-41-0633). According to Danish law, approval from an ethics committee is not required for anonymous registry-based studies.

### Study population

We established a cohort of all patients with incident non-valvular AF, defining non-valvular AF as presence of AF, and baseline absence of mitral stenosis or mechanical heart valves. Specifically, we identified all patients discharged with a first hospital diagnosis of non-valvular AF between 2000 and 2015. To ensure sufficient clinical record history for treatment and diagnoses, we excluded patients who had not been residents in Denmark for at least 1 year before date of AF diagnosis

1  
2  
3  
4 (index date). We further excluded patients with valvular AF; patients who died on the day of AF  
5  
6 diagnosis; and patients with a fatal thromboembolic event defined as death within the following 30  
7  
8 days of ischemic stroke, systemic embolism, pulmonary embolism or myocardial infarction before  
9  
10 AF diagnosis (Supplementary Figure 1). The positive predictive value (PPV) of an AF diagnosis in  
11  
12 the National Patient Register is 95% (95% CI 89-98).<sup>18</sup>  
13  
14

### 15 16 17 **Exposure**

18  
19 Through the National Patient Register, we identified all patients in the study population with an  
20  
21 inpatient or outpatient diagnosis of schizophrenia, bipolar disease or severe depression before the  
22  
23 index date. In Denmark, these mental disorders are primarily treated in public hospitals ensuring a  
24  
25 high coverage of contacts with psychiatric disorders. The PPV of a diagnosis of mental disorders in  
26  
27 the National Patient Register is 98% (95% CI 90-99).<sup>18</sup>  
28  
29  
30  
31  
32

33  
34 To control for confounding by reducing imbalance in the data and thereby model dependence and  
35  
36 bias, we used Coarsened Exact Matching to produce a one-to-five match of patients with  
37  
38 schizophrenia, severe depression, or bipolar disease on age, sex and calendar time (year of index  
39  
40 date) to comparison cohorts of AF patients without mental disorders.<sup>19</sup> Patients age was grouped in  
41  
42 approximately 5-year intervals based on the statistical software package Stata's (Stata Corp, version  
43  
44 14) function *cem*'s algorithm for automatic coarsening.<sup>20</sup> To evaluate the effect of matching on the  
45  
46 balance between baseline variables we estimated the absolute standardized differences before and  
47  
48 after matching.  
49  
50  
51  
52  
53

### 54 **Patient characteristics**

55  
56  
57  
58  
59  
60

1  
2  
3  
4 Baseline comorbidity was defined according to medication claims within the year before the AF  
5 diagnosis and/or history of primary or secondary hospital discharge diagnoses (excluding  
6 emergency room diagnoses) since 1994. Comorbidity information included cardiovascular and  
7  
8 metabolic diseases, and lifestyle related diseases (e.g., alcohol-related diseases such as alcoholic  
9 liver disease, and alcoholic polyneuropathy, cardiomyopathy, gastritis or myopathy, and alcohol-  
10 induced pancreatitis). We further combined baseline information into the CHA<sub>2</sub>DS<sub>2</sub>VASc stroke  
11 risk score<sup>21</sup> to summarize perceived stroke risk at baseline, and the HAS-BLED score<sup>22</sup> as a  
12 measure of bleeding risk at baseline (see score definitions in Supplementary Table 2).  
13  
14  
15  
16  
17  
18  
19  
20  
21  
22  
23

## 24 **Outcomes**

25  
26 Study outcomes were ischemic stroke, fatal thromboembolic events of ischemic stroke, systemic  
27 embolism, pulmonary embolism or myocardial infarction (as defined above), and major bleeding  
28 events recorded as intracranial, gastro-intestinal, and major bleeding in various anatomical positions  
29 reported in total as 'any bleeding'. We derived all outcomes from hospital diagnoses in the National  
30 Patient Register. Stroke diagnoses were required to be primary in-hospital codes, excluding  
31 emergency room and ambulatory diagnoses, to ensure higher validity.  
32  
33  
34  
35  
36  
37  
38  
39  
40  
41

## 42 **Statistical analyses**

43  
44 We followed all patients from their AF diagnosis and up to five years after baseline. Follow-up was  
45 censored at time of death, migration, study end (November 21, 2016), or the outcome of interest,  
46 whichever came first. Patient baseline characteristics were presented as proportions for discrete  
47 variables and means with standard deviations (SD) for continuous variables. Crude incidence rates  
48 were calculated as number of events divided by person-time. Cumulative incidence functions (by  
49 means of the Aalen-Johansen estimator), assuming death as competing risk, were used to depict risk  
50  
51  
52  
53  
54  
55  
56  
57  
58  
59  
60

1  
2  
3  
4 of outcome during follow-up. We assessed the association between each mental disorder and study  
5  
6 outcome using Cox Proportional hazard regression with stratification on the matched groups. To  
7  
8 assess to which extent the observed association could be explained by comorbidity and/or use of  
9  
10 OAT, we performed sequential cumulative adjustment for 1) stroke risk and bleeding risk as  
11  
12 summarized by components of the CHA<sub>2</sub>DS<sub>2</sub>VASc and HAS-BLED scores, and comorbidities not  
13  
14 included in CHA<sub>2</sub>DS<sub>2</sub>VASc and HAS-BLED (chronic pulmonary disease, cancer, and venous  
15  
16 thromboembolism), and 2) use of OAT during follow-up modelled as a time-varying covariate  
17  
18 shifting from untreated to treated status at first observed prescription of any OAC. We excluded age  
19  
20 and sex in the CHA<sub>2</sub>DS<sub>2</sub>VASc and HAS-BLED scores as these were included as matching factors  
21  
22 and perfectly balanced between comparison cohorts (Supplementary Table 3). The distribution of  
23  
24 time to OAC treatment initiation was presented by cumulative incidence curves (Supplementary  
25  
26 Figure 2). Point estimates were reported with 95% confidence intervals (CI) and a p-value less than  
27  
28 0.05 was considered statistically significant.  
29  
30  
31  
32  
33  
34  
35  
36  
37  
38  
39  
40  
41  
42  
43  
44  
45  
46  
47  
48  
49  
50  
51  
52  
53  
54  
55  
56  
57  
58  
59  
60

## RESULTS

We identified 260,974 AF patients during the study period. After exclusions, the study cohort comprised 253,741 AF patients of which 534 patients had schizophrenia, 400 severe depression, and 569 bipolar disease (Supplementary Figure 1). Table 1 shows baseline characteristics according to presence and type of mental disorder. AF patients with schizophrenia were substantially younger (mean age 64.5 years) whereas the age of patients with severe depression (73.7 years) and bipolar disease (73.0 years) was comparable with patients without mental disorders (73.3 years). Baseline stroke risk appeared lower in patients with schizophrenia; mean CHA<sub>2</sub>DS<sub>2</sub>-VASc score was 2.5 versus 3.1 in patients without mental disorders. However, this was explained by the lower age of schizophrenic patients. The CHA<sub>2</sub>DS<sub>2</sub>-VASc score was 3.6 in patients with severe depression and 3.3 in patients with bipolar disease (Table 1). The higher CHA<sub>2</sub>DS<sub>2</sub>-VASc score in patients with severe depression was primarily driven by a large proportion of females (61.8% vs. 46.7% in comparisons) and patients with prior stroke (30.3% vs. 16.9%). In comparison, 14.2% of schizophrenic patients had prior stroke; they also had lower prevalence of hypertension, myocardial infarction, and peripheral arterial disease. Compared with patients with no mental disorder, the HAS-BLED score was also higher in patients with severe depression and bipolar disease whereas it was lower in patients with schizophrenia. Alcohol-related diseases were prevalent across all mental disorders, particularly for patients with schizophrenia or bipolar disease (~20% vs. 4% in comparisons). Supplemental Table 3 shows characteristics for patients with schizophrenia, severe depression, and bipolar disease and their matched comparisons. After matching, the mean CHA<sub>2</sub>DS<sub>2</sub>-VASc score was 2.3 in AF patients without schizophrenia (Supplementary Table 3).

### Ischemic stroke

Figure 1 displays cumulative incidence curves for ischemic stroke in the matched cohorts. Rates of ischemic stroke at 5 years was 1.96 events per 100 person-years in schizophrenic AF patients vs.

1  
2  
3  
4 1.30 in matched comparisons (Table 2), yielding a crude HR of 1.37 (95% CI 0.88-2.14) with  
5  
6 confidence intervals including unity (Figure 2). After adjustment for stroke risk as summarized by  
7  
8 the CHA<sub>2</sub>DS<sub>2</sub>-VASc and HAS-BLED scores and other comorbidities this HR was 1.29 (95% CI  
9  
10 0.81-2.07) (Figure 2). Rates of OAT initiation in AF patients with mental disorders was  
11  
12 substantially lower than in matched comparisons (Supplementary Figure 2), and after additional  
13  
14 adjustment for OAT use during follow-up the HR of ischemic stroke was 1.16 (95% CI 0.72-1.87)  
15  
16 (Figure 2). At 5-years the rate of ischemic stroke was 2.74 per 100 person-years in patients with  
17  
18 severe depression vs. 1.93 in matched comparisons (crude HR of 1.36, 95% CI 0.89-2.08). Similar  
19  
20 to patients with schizophrenia, the crude HR was substantially attenuated by sequential adjustment  
21  
22 for stroke risk factors, comorbidity, and OAT (HR 1.01, 95% CI 0.64-1.58) (Figure 2). This pattern  
23  
24 of diminishing HRs with sequential adjustment for stroke risk factors and OAT was also evident in  
25  
26 patients with bipolar disease in whom the crude HR was 1.04 (95% CI 0.69-1.56) and the fully  
27  
28 adjusted HR was 0.85 (95% CI 0.55-1.29). Thus, compared with AF patients without mental  
29  
30 disorders, the fully adjusted HRs indicated comparable HRs of ischemic stroke across all mental  
31  
32 disorders with wide CIs that crossed unity (Figure 2).  
33  
34  
35  
36  
37  
38  
39  
40  
41

### 42 **Fatal thromboembolic events**

43  
44 During 5-years follow-up, 19 fatal thromboembolic events occurred in AF patients with  
45  
46 schizophrenia, 11 in patients with severe depression and 20 in patients with bipolar disease.  
47

48 Accordingly, rates of fatal thromboembolic events per 100 person-years was substantially lower  
49  
50 than rates of ischemic stroke; 1.43 for schizophrenia vs. 0.52 in matched comparisons, 1.03 vs. 0.82  
51  
52 for severe depression, and 1.41 vs. 0.83 for patients with bipolar disease (Table 2).  
53

54  
55 Notwithstanding, due to the low rate in the matched comparisons, cumulative incidence curves  
56  
57  
58  
59  
60

1  
2  
3  
4 revealed distinct differences in rates of fatal thromboembolic events in patients with schizophrenia  
5  
6 vs. matched comparisons (Figure 3) and to lesser extent in patients with bipolar disease. The  
7  
8 equivalent 5-year HR was 3.16 (95% CI 1.78-5.61) decreasing to 2.88 (95% CI 1.57-5.28) after  
9  
10 adjustment for stroke risk factors, comorbidity, and OAT (Figure 2). The unadjusted HR of fatal  
11  
12 thromboembolic events in patients with severe depression vs. matched comparisons was 1.31 (95%  
13  
14 CI 0.67-2.56). After adjustment for stroke risk factors, comorbidity, and OAT, the HR was 0.75  
15  
16 (95% CI 0.37-1.52). In patients with bipolar disease the crude HR was 1.53 (95% CI 0.93-2.53)  
17  
18 compared with matched comparisons. Following sequential adjustment the HR was 1.23 (95% CI  
19  
20 0.72-2.09) (Figure 2).  
21  
22  
23  
24  
25

### 26 **Major bleeding**

27  
28 The cumulative incidence curves showed higher rates of major bleeding in patients with  
29  
30 schizophrenia and severe depression compared with their matched comparisons, whereas the curves  
31  
32 for bipolar disease overlapped (Figure 4). At 5 years, the rate of bleeding was 3.72 events per 100  
33  
34 person-years in schizophrenic patients vs. 2.62 in matched comparisons (crude HR of 1.37, 95% CI  
35  
36 0.99-1.90), 4.06 per 100 person-years in patients with severe depression vs. 3.24 in matched  
37  
38 comparisons (crude HR of 1.25, 95% CI 0.87-1.78), and 2.90 vs. 3.27 in patients with bipolar  
39  
40 disease (HR of 0.82, 95% CI 0.58-1.15) (Table 2, Figure 2). Sequential adjustment for the  
41  
42 components of the CHA<sub>2</sub>DS<sub>2</sub>-VASc and HAS-BLED scores (including use of aspirin, NSAID and  
43  
44 clopidogrel at baseline) and use of OAT attenuated the association in patients with schizophrenia  
45  
46 and severe depression (Figure 2).  
47  
48  
49  
50  
51  
52  
53  
54  
55  
56  
57  
58  
59  
60

## DISCUSSION

### *Principal findings*

This nationwide cohort study revealed a low prevalence of severe mental disorders among patients with incident AF in Denmark. Patients with schizophrenia or severe depression experience higher risk of ischemic stroke and major bleeding compared with matched AF patients without mental disorders, although the differences were not statistically significant. However, after sequential adjustment for stroke and bleeding risk factors, comorbidity and use of OAT, hazard rates were comparable with matched comparisons, suggesting that the excess risk in patients with schizophrenia and severe depression stem from higher prevalence of risk factors for stroke and bleeding and differences in use of OAT. In comparison, bipolar disease was not associated with higher risk of stroke and bleeding both before and after adjustment. Few thromboembolic events occurred during follow-up. Nonetheless, we noted a substantially higher mortality after a thromboembolic event in patients with schizophrenia than in matched comparisons.

### *Strengths and limitations*

These estimates of stroke risk and thromboembolic events in AF patients are based on a nationwide cohort study conducted in a setting where virtually all medical care is provided free of charge, and with complete follow-up through nationwide registries. Nonetheless, despite universal tax-supported health care in Denmark, diagnoses in patients with mental disorders may have been underreported.<sup>23,24</sup> From the current study, we are not able to conclude whether the low prevalence of AF patients with mental disorders reflect the true picture or whether AF may be under-diagnosed in these patients. Likewise, we cannot exclude a possibility for differential misclassification of study outcomes, if stroke and thromboembolic events were under-diagnosed in patients with severe mental disorders. Such misclassification would bias our estimates toward the null. Furthermore, we included only patients with mental disorders recorded in the hospital register, and the prevalence is likely underestimated, mainly with regard to severe depression. However, we infer that the majority



1  
2  
3  
4 of patients with schizophrenia and bipolar disease are in contact with the psychiatric hospital system  
5  
6 due the severity of these conditions. It is also important to note that we only had information on  
7  
8 psychiatric admissions from 1995 onwards. Thus, patients with a diagnosis before 1995 and no  
9  
10 recorded diagnosis thereafter would not be included in the exposed cohort. Lack of data on alcohol,  
11  
12 smoking, exercise, and other lifestyle related risk factors associated with increased risk of study  
13  
14 outcomes is another limitation. We were able to adjust for hospital diagnoses of alcohol-related  
15  
16 conditions and many other lifestyle-related diseases including chronic pulmonary disease, diabetes,  
17  
18 liver disease, cardiovascular disease, and cancer, which were more prevalent among patients with  
19  
20 mental disorders. Nonetheless, incomplete control for these factors likely lead to residual  
21  
22 confounding, e.g. bleeding risk due to alcohol abuse.<sup>25,26</sup> Likewise, we did not assess the association  
23  
24 between anti-psychotic medications and stroke risk in this study. Finally, Use of OAT was  
25  
26 determined based on prescription redemption, which may be a limitation, as some patients may not  
27  
28 take their medication. Our data did not contain information on the quality and compliance with  
29  
30 OAT, which may be lower among patients with mental disorders due to cognitive limitations and  
31  
32 maladaptive behaviours.<sup>27</sup>  
33  
34  
35  
36  
37  
38  
39

#### 40 *Comparison with other studies*

41  
42 Our findings are concordant with two prior studies on outcomes of AF patients with mental  
43  
44 disorders receiving warfarin.<sup>11,13</sup> In a US cohort study of 9,345 Medicaid recipients receiving two or  
45  
46 more warfarin prescriptions less than 100 days apart, Schauer et al<sup>13</sup> demonstrated HRs of 1.36  
47  
48 (95% CI 1.06-1.74) for ischemic stroke in patients with mental disorders illnesses compared with  
49  
50 patients without. In another US cohort study, Paradise et al<sup>11</sup> showed that mental disorders was  
51  
52 associated with an increased risk of major bleeding (HR:1.19, 95% CI 1.11-1.27) in patients with  
53  
54 any mental disorder vs. propensity matched comparisons in 103,897 patients receiving warfarin for  
55  
56  
57  
58  
59  
60

1  
2  
3  
4 at least 6 months through the Veterans Health Administration. Both studies only included patients  
5  
6 who were considered appropriate for OAT and who actually received it and remained successfully  
7  
8 on treatment for an extended period. Thus, these results may not reflect stroke risk in all patients  
9  
10 with mental disorders.  
11

12  
13  
14  
15 Our findings expand prior studies by including all AF patients regardless of OAT use. We saw a  
16  
17 noticeable lower rate of OAT initiation in patients with mental disorders compared with matched  
18  
19 comparisons, which is in line with prior studies showing that AF patient with mental disorders are  
20  
21 less likely to receive OAT.<sup>9,10</sup> Schmitt et al<sup>10</sup> found that AF patients with mental disorders had  
22  
23 higher prevalence of stroke risk factors and contraindications to OAT. Thus, lower treatment rates  
24  
25 in patients with mental disorders may reflect appropriate attention to bleeding risk. On the other  
26  
27 hand, when restricting to patients eligible for OAT, patients with mental disorders remained less  
28  
29 likely to receive OAT.<sup>10</sup> As the higher stroke rates in our study appeared to be due to differences in  
30  
31 stroke risk factors, comorbidity, and receipt of OAT, any disparities in the care of AF patients with  
32  
33 mental disorders requires close attention. Other studies have shown that patients with mental  
34  
35 disorders have worse OAT control.<sup>9,11,12</sup> Walker et al<sup>9</sup> found that when prescribed warfarin, AF  
36  
37 patients with mental disorders were substantially more likely to have highly supra-therapeutic  
38  
39 International Normalized Ratio (INR) values than those without mental disorders (27.3% vs. 1.6%  
40  
41 had at least one INR measurement above 5.0). However, this assessment was based on a sub-cohort  
42  
43 of only 84 AF patients and should be interpreted with caution.  
44  
45  
46  
47  
48

49  
50 The higher mortality within the 30-days following a thromboembolic event in patients with  
51  
52 schizophrenia is of concern and emphasizes the need for vigilant follow-up in this patient  
53  
54 population. The finding is in line with prior studies reporting increased cardiac mortality in patients  
55  
56  
57  
58  
59  
60

1  
2  
3  
4 with schizophrenia.<sup>24,28</sup> Future studies are encouraged to explore potential reasons which are likely  
5  
6 multifactorial and may entail both severity of illness, comorbidity, quality of care, and factors  
7  
8 beyond patient care.<sup>29</sup>  
9

### 10 11 12 13 *Conclusions*

14  
15 In conclusion, this study showed that schizophrenia or severe depression in patients with AF is  
16  
17 associated with increased risk of ischemic stroke and major bleeding. When sequentially controlling  
18  
19 for stroke and bleeding risk factors, comorbidity, and use of OAT the hazard rates attenuated and  
20  
21 were comparable with matched comparisons, indicating that the excess risk is due to a higher  
22  
23 prevalence of risk factors for stroke and bleeding and lower use of OAT in patients with mental  
24  
25 disorders. In comparison, rates were not increased in patients with bipolar disease when compared  
26  
27 with age and sex matched comparisons without mental disorders both before and after adjustment.  
28  
29 Patients with schizophrenia also experienced higher mortality following a thromboembolic event  
30  
31 than matched comparisons. These findings highlight the importance of close attention to stroke and  
32  
33 bleeding risk factors and potential disparities in receipt of OAT in AF patients with mental  
34  
35 disorders. Our findings also identify challenges in the management of AF patients with mental  
36  
37 disorders; the excess burden of stroke risk factors signifies the need for stroke prevention whereas  
38  
39 the higher rates of major bleeding emphasize that that cautious assessment of bleeding risk and  
40  
41 quality of OAT may be particularly pertinent for patients with mental disorders. In this respect, our  
42  
43 findings could indicate a need for optimized coordination and collaboration between general  
44  
45 somatic and mental health services in order to optimize treatment.  
46  
47  
48  
49  
50  
51  
52  
53  
54  
55  
56  
57  
58  
59  
60

## ACKNOWLEDGEMENTS

### Author Contributions

MS, FS and JNK had full access to all of the data in this study and take responsibility for the integrity of the data and the accuracy of the data analysis. SR, SPJ and TBL provided the idea for the study. MS, FS, TBL and SR defined the study concept and performed the critical interpretation of the data. MS drafted the article. All authors contributed critical revisions and approved the final version to be published.

### Conflicts of Interest Disclosures

Associate Professor Larsen has served as an investigator for Janssen Scientific Affairs, LLC and Boehringer Ingelheim and has served as a speaker for Bayer, BMS/Pfizer, Boehringer Ingelheim. Senior Statistician Flemming Skjøth has served as a consultant for Bayer. Other authors – none declared.

### Role of the Funders/Sponsors

The Obel Family Foundation partly funded this research by an unrestricted grant. The sponsor had no role in the design and conduct of the study; collection, management, analysis, and interpretation of the data; and preparation, review, or approval of the manuscript.

**Ethics approval:** The study was approved by the Danish Data Protection Agency (Record number 2012-41-0633).

**Data sharing statement:** No additional data are available

**REFERENCES**

1. Hert M De, Dekker JM, Wood D, Kahl KG, Holt RIG, Möller H-J. Cardiovascular disease and diabetes in people with severe mental illness position statement from the European Psychiatric Association (EPA), supported by the European Association for the Study of Diabetes (EASD) and the European Society of Cardiology (ESC). *Eur Psychiatry*; 2009;**24**:412–424.
2. Laursen TM, Munk-Olsen T, Gasse C. Chronic somatic comorbidity and excess mortality due to natural causes in persons with schizophrenia or bipolar affective disorder. *PLoS One* 2011;**6**.
3. Bresee LC, Majumdar SR, Patten SB, Johnson JA. Prevalence of cardiovascular risk factors and disease in people with schizophrenia: A population-based study. *Schizophr Res*; 2010;**117**:75–82.
4. Bernardo M, Cañas F, Banegas JR, Casademont J, Riesgo Y, Varela C, RICAVA Study Group. Prevalence and awareness of cardiovascular risk factors in patients with schizophrenia: a cross-sectional study in a low cardiovascular disease risk geographical area. *Eur Psychiatry* 2009;**24**:431–441.
5. Osborn DPJ, Wright CA, Levy G, King MB, Deo R, Nazareth I. Relative risk of diabetes, dyslipidaemia, hypertension and the metabolic syndrome in people with severe mental illnesses: systematic review and metaanalysis. *BMC Psychiatry* 2008;**8**:84.
6. Correll CU, Detraux J, Lepeleire J De, Hert M De. Effects of antipsychotics, antidepressants and mood stabilizers on risk for physical diseases in people with schizophrenia, depression and bipolar disorder. *World Psychiatry* 2015;**14**:119–136.
7. Wang J, Liu Y, Zhu W, Zhang F, Zhou Z. Olanzapine-induced weight gain plays a key role in the potential cardiovascular risk: evidence from heart rate variability analysis. *Sci Rep* 2014;**4**:7394.

- 1  
2  
3  
4 8. Kirchof P, Benussi S, Kotecha D, et al. 2016 ESC Guidelines for the management of  
5 atrial fibrillation developed in collaboration with EACTS. *Europace* 2016;**18**:1609–1678.  
6  
7
- 8  
9 9. Walker GA, Heidenreich PA, Phibbs CS, Go AS, Chiu VY, Schmitt SK, Ananth L,  
10 Frayne SM. Mental illness and warfarin use in atrial fibrillation. *Am J Manag Care* 2011;**17**:617–  
11  
12 624.  
13
- 14  
15 10. Schmitt SK, Turakhia MP, Phibbs CS, et al. Anticoagulation in atrial fibrillation:  
16 impact of mental illness. *Am J Manag Care* 2015;**21**:e609–e617.  
17  
18
- 19  
20 11. Paradise HT, Berlowitz DR, Ozonoff A, et al. Outcomes of anticoagulation therapy in  
21 patients with mental health conditions. *J Gen Intern Med* 2014;**29**:855–861.  
22  
23
- 24  
25 12. Rose AJ, Hylek EM, Ozonoff A, Ash AS, Reisman JI, Berlowitz DR. Patient  
26 characteristics associated with oral anticoagulation control: Results of the Veterans AffaiRs Study  
27 to Improve Anticoagulation (VARIA). *J Thromb Haemost* 2010;**8**:2182–2191.  
28  
29
- 30  
31 13. Schauer DP, Moomaw CJ, Wess M, Webb T, Eckman MH. Psychosocial risk factors  
32 for adverse outcomes in patients with nonvalvular atrial fibrillation receiving warfarin. *J Gen Intern*  
33  
34 *Med* 2005;**20**:1114–1119.  
35  
36
- 37  
38 14. Schmidt M, Schmidt SSAJ, Sandegaard JLJ, Ehrenstein V, Pedersen L, Sørensen HT.  
39 The Danish National Patient Registry: a review of content, data quality, and research potential. *Clin*  
40  
41 *Epidemiol* 2015;**7**:449–490.  
42  
43
- 44  
45 15. Pottegård A, Schmidt SAJ, Wallach-Kildemoes H, Sørensen HT, Hallas J, Schmidt M.  
46 Data Resource Profile: The Danish National Prescription Registry. *Int J Epidemiol* 2016;dyw213.  
47  
48
- 49  
50 16. Schmidt M, Pedersen L, Sørensen HT. The Danish Civil Registration System as a tool  
51 in epidemiology. *Eur J Epidemiol* 2014;**29**:541–549.  
52  
53  
54  
55  
56  
57  
58  
59  
60

- 1  
2  
3  
4 17. Thygesen LC, Daasnes C, Thaulow I, Brønnum-Hansen H. Introduction to Danish  
5 (nationwide) registers on health and social issues: structure, access, legislation, and archiving.  
6  
7  
8  
9 *Scand J Public Health* 2011;**39**:12–16.
- 10  
11 18. Sundbøll J, Adelborg K, Munch T, et al. Positive predictive value of cardiovascular  
12 diagnoses in the Danish National Patient Registry: a validation study. *BMJ Open* 2016;**6**:e012832.
- 13  
14 19. Iacus SM, King G, Porro G. Matching for causal inference without balance checking.  
15  
16  
17 *Available SSRN 1152391* 2008;1–17.
- 18  
19 20. Blackwell M, Iacus S, King G, Porro G. Cem: Coarsened exact matching in Stata.  
20  
21  
22 *Stata J* 2009;**9**:524–546.
- 23  
24 21. Lip GYH, Nieuwlaat R, Pisters R, Lane DA, Crijns HJGM. Refining clinical risk  
25 stratification for predicting stroke and thromboembolism in atrial fibrillation using a novel risk  
26 factor-based approach: the euro heart survey on atrial fibrillation. *Chest* 2010;**137**:263–272.
- 27  
28 22. Pisters R, Lane DA, Nieuwlaat R, Vos CB de, Crijns HJGM, Lip GYH. A novel user-  
29 friendly score (HAS-BLED) to assess 1-year risk of major bleeding in patients with atrial  
30 fibrillation: the Euro Heart Survey. *Chest* 2010;**138**:1093–1100.
- 31  
32 23. Laursen TM, Munk-Olsen T, Agerbo E, Gasse C, Mortensen PB. Somatic hospital  
33 contacts, invasive cardiac procedures, and mortality from heart disease in patients with severe  
34 mental disorder. *Arch Gen Psychiatry* 2009;**66**:713–720.
- 35  
36 24. Crump C, Winkleby M a, Sundquist K, Sundquist J. Comorbidities and mortality in  
37 persons with schizophrenia: a Swedish national cohort study. *Am J Psychiatry* 2013;**170**:324–333.
- 38  
39 25. Roth JA, Bradley K, Thummel KE, Veenstra DL, Boudreau D. Alcohol misuse,  
40 genetics, and major bleeding among warfarin therapy patients in a community setting.  
41  
42  
43  
44  
45  
46  
47  
48  
49  
50  
51  
52  
53  
54  
55  
56  
57  
58  
59  
60 *Pharmacoepidemiol Drug Saf* 2015;**24**:619–627.

- 1  
2  
3  
4 26. Sandén P, Renlund H, Svensson PJ, Själander A. Bleeding complications in venous  
5 thrombosis patients on well-managed warfarin. *J Thromb Thrombolysis* 2016;**41**:351–358.  
6  
7  
8 27. Lawrence D, Kisely S. Inequalities in healthcare provision for people with severe  
9 mental illness. *J Psychopharmacol* 2010;**24**:61–68.  
10  
11 28. Olfson M, Gerhard T, Huang C, Crystal S, Stroup TS. Premature Mortality Among  
12 Adults With Schizophrenia in the United States. *JAMA psychiatry* 2015;**72**:1172–1181.  
13  
14 29. Ringen PA, Engh JA, Birkenaes AB, Dieset I, Andreassen OA. Increased mortality in  
15 schizophrenia due to cardiovascular disease - a non-systematic review of epidemiology, possible  
16 causes and interventions. *Front Psychiatry* 2014;**5**:1–11.  
17  
18  
19  
20  
21  
22  
23  
24  
25  
26  
27  
28  
29  
30  
31  
32  
33  
34  
35  
36  
37  
38  
39  
40  
41  
42  
43  
44  
45  
46  
47  
48  
49  
50  
51  
52  
53  
54  
55  
56  
57  
58  
59  
60



## FIGURE LEGENDS

**Figure 1.** Cumulative incidence of ischemic stroke in patients with atrial fibrillation and mental disorders and matched atrial fibrillation patients without mental disorders.

**Figure 2.** Crude and adjusted hazard ratios (HR) with 95% confidence intervals (CI) for ischemic stroke, fatal thromboembolic events, and major bleeding in atrial fibrillation patients with severe mental disorders compared with matched atrial fibrillation patients without mental disorders.

**Figure 3.** Cumulative incidence of fatal thromboembolic events in patients with atrial fibrillation and mental disorders and matched atrial fibrillation patients without mental disorder.

**Figure 4.** Cumulative incidence of major bleeding in patients with atrial fibrillation and mental disorders and matched atrial fibrillation patients without mental disorder.

Table 1. Descriptive characteristics of patients with incident atrial fibrillation in Denmark according to presence of mental health disorders before matching.

| Characteristic, % (N)                                 | No mental disorder (N=252,238) | Schizophrenia (N=534) | Severe depression (N=400) | Bipolar disease (N=569) |
|-------------------------------------------------------|--------------------------------|-----------------------|---------------------------|-------------------------|
| Demographic characteristics                           |                                |                       |                           |                         |
| Females                                               | 46.7 (117,876)                 | 45.7 (244)            | 61.8 (247)                | 59.6 (339)              |
| Mean age (SD)                                         | 73.3 (13.1)                    | 64.5 (13.7)           | 73.7 (14.0)               | 73.0 (11.2)             |
| Stroke risk factors and comorbidity                   |                                |                       |                           |                         |
| Mean CHA <sub>2</sub> DS <sub>2</sub> VASc score (SD) | 3.1 (1.8)                      | 2.5 (1.7)             | 3.6 (2.0)                 | 3.3 (1.8)               |
| Mean HASBLED score (SD)                               | 2.2 (1.2)                      | 1.9 (1.3)             | 2.5 (1.4)                 | 2.5 (1.3)               |
| Prior stroke                                          | 16.9 (42,585)                  | 14.2 (76)             | 30.3 (121)                | 20.2 (115)              |
| Heart failure                                         | 25.7 (64,704)                  | 30.0 (160)            | 30.3 (121)                | 29.3 (167)              |
| Hypertension                                          | 42.6 (107,332)                 | 26.6 (142)            | 44.5 (178)                | 36.6 (208)              |
| Myocardial infarction                                 | 10.3 (26,089)                  | 8.2 (44)              | 11.3 (45)                 | 9.3 (53)                |
| Peripheral arterial disease                           | 7.6 (19,266)                   | 6.7 (36)              | 10.0 (40)                 | 9.0 (51)                |
| Diabetes                                              | 12.9 (32,606)                  | 24.3 (130)            | 15.8 (63)                 | 20.2 (115)              |
| Prior bleeding                                        | 26.4 (66,694)                  | 28.1 (150)            | 44.0 (176)                | 37.6 (214)              |
| Renal dysfunction                                     | 5.2 (13,003)                   | 10.1 (54)             | 8.5 (34)                  | 15.8 (90)               |
| Prior venous thromboembolism                          | 4.8 (12,081)                   | 7.3 (39)              | 10.8 (43)                 | 10.0 (57)               |
| Chronic pulmonary disease                             | 14.5 (36,615)                  | 28.7 (153)            | 22.3 (89)                 | 30.8 (175)              |
| Cancer                                                | 15.9 (40,171)                  | 12.9 (69)             | 14.8 (59)                 | 17.0 (97)               |
| Alcohol-related disease                               | 4.2 (10,471)                   | 19.1 (102)            | 11.0 (44)                 | 20.9 (119)              |
| Medication use within 365 days before index date      |                                |                       |                           |                         |
| Coumarin                                              | 14.4 (36,326)                  | 5.1 (27)              | 8.8 (35)                  | 12.1 (69)               |
| NOAC                                                  | 2.5 (6,347)                    | 3.4 (18)              | 2.3 (9)                   | 2.3 (13)                |
| Aspirin                                               | 37.6 (94,951)                  | 33.0 (176)            | 40.5 (162)                | 38.1 (217)              |
| Clopidogrel                                           | 4.3 (10,936)                   | 5.6 (30)              | 9.0 (36)                  | 5.6 (32)                |
| NSAID                                                 | 26.7 (67,468)                  | 25.1 (134)            | 27.3 (109)                | 25.0 (142)              |

|                                                      |               |            |            |            |
|------------------------------------------------------|---------------|------------|------------|------------|
| Digoxin                                              | 12.4 (31,200) | 9.9 (53)   | 8.8 (35)   | 12.1 (69)  |
| Non-loop diuretics                                   | 36.2 (91,336) | 25.1 (134) | 38.8 (155) | 34.4 (196) |
| Loop-diuretics                                       | 25.5 (64,337) | 34.8 (186) | 28.8 (115) | 36.0 (205) |
| Beta-blocker                                         | 32.2 (81,335) | 22.7 (121) | 28.0 (112) | 24.3 (138) |
| Calcium channel blocker                              | 25.5 (64,355) | 17.0 (91)  | 31.0 (124) | 25.1 (143) |
| Renin-angiotensin inhibitor                          | 35.5 (89,621) | 23.8 (127) | 37.5 (150) | 32.0 (182) |
| Statins                                              | 24.6 (62,166) | 23.2 (124) | 26.0 (104) | 27.4 (156) |
| Antiepileptics                                       | 4.0 (10,077)  | 24.3 (130) | 16.0 (64)  | 39.5 (225) |
| Anticholinergics                                     | 0.2 (456)     | 27.2 (145) | 2.3 (9)    | 5.3 (30)   |
| Antipsychotics, lithium and<br>anxiolytics/hypnotics | 27.1 (68,302) | 87.1 (465) | 63.2 (253) | 83.3 (474) |
| Antidepressants                                      | 14.5 (36,516) | 34.8 (186) | 78.5 (314) | 61.0 (347) |

Abbreviations:

SD: Standard deviation

NOAC: Non-vitamin K oral anticoagulant

NSAID: Non-steroidal anti-inflammatory drugs

**Table 2.** Number of events and rates of stroke, fatal thromboembolic events, and major bleeding at 5 years following incident atrial fibrillation.

| Characteristic                        | Patients | Ischemic stroke |      | Fatal thromboembolic events |      | Major bleeding |      |
|---------------------------------------|----------|-----------------|------|-----------------------------|------|----------------|------|
|                                       | N        | Events, N       | Rate | Events, N                   | Rate | Events, N      | Rate |
| Entire unmatched AF comparison cohort | 252,238  | 15,710          | 2.03 | 8,039                       | 1.00 | 26,711         | 3.53 |
| <i>Schizophrenia</i>                  |          |                 |      |                             |      |                |      |
| Schizophrenia                         | 534      | 25              | 1.96 | 19                          | 1.43 | 46             | 3.72 |
| Matched comparison cohort             | 2,669    | 114             | 1.30 | 47                          | 0.52 | 225            | 2.62 |
| <i>Severe depression</i>              |          |                 |      |                             |      |                |      |
| Severe depression                     | 400      | 28              | 2.74 | 11                          | 1.03 | 41             | 4.06 |
| Matched comparison cohort             | 2,000    | 113             | 1.93 | 50                          | 0.82 | 188            | 3.24 |
| <i>Bipolar disease</i>                |          |                 |      |                             |      |                |      |
| Bipolar disease                       | 569      | 28              | 1.90 | 20                          | 1.41 | 39             | 2.90 |
| Matched comparison cohort             | 2,845    | 164             | 2.04 | 74                          | 0.83 | 274            | 3.27 |

Rates are calculated as number of events divided by person-time per 100 years.

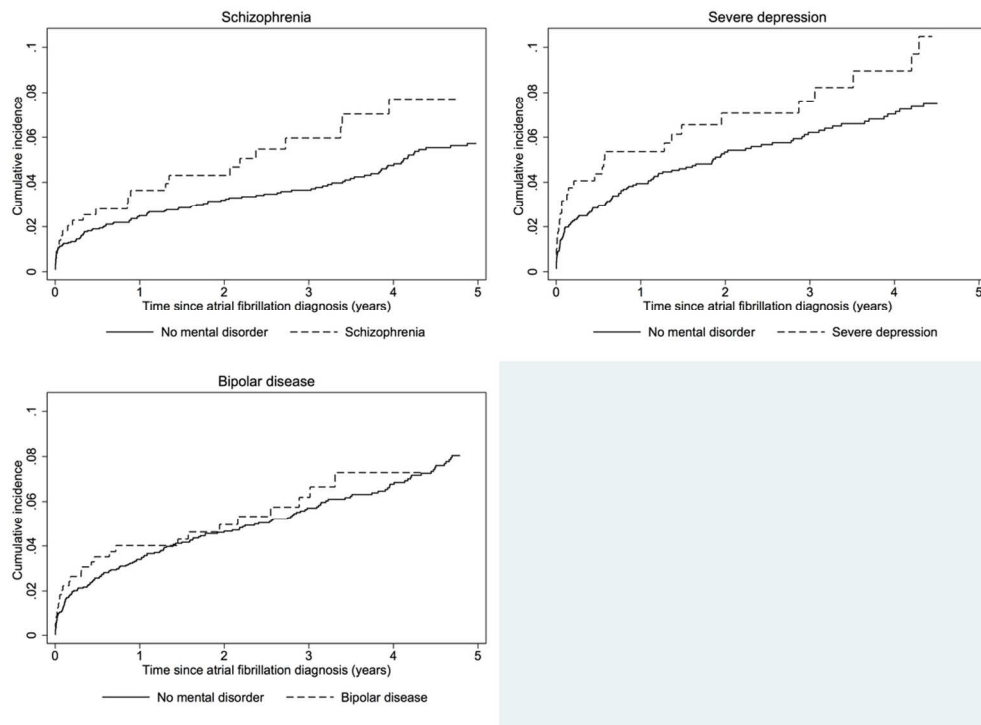

Figure 1

101x73mm (300 x 300 DPI)

View only

1  
2  
3  
4  
5  
6  
7  
8  
9  
10  
11  
12  
13  
14  
15  
16  
17  
18  
19  
20  
21  
22  
23  
24  
25  
26  
27  
28  
29  
30  
31  
32  
33  
34  
35  
36  
37  
38  
39  
40  
41  
42  
43  
44  
45  
46  
47  
48  
49  
50  
51  
52  
53  
54  
55  
56  
57  
58  
59  
60

1  
2  
3  
4  
5  
6  
7  
8  
9  
10  
11  
12  
13  
14  
15  
16  
17  
18  
19  
20  
21  
22  
23  
24  
25  
26  
27  
28  
29  
30  
31  
32  
33  
34  
35  
36  
37  
38  
39  
40  
41  
42  
43  
44  
45  
46  
47  
48  
49  
50  
51  
52  
53  
54  
55  
56  
57  
58  
59  
60

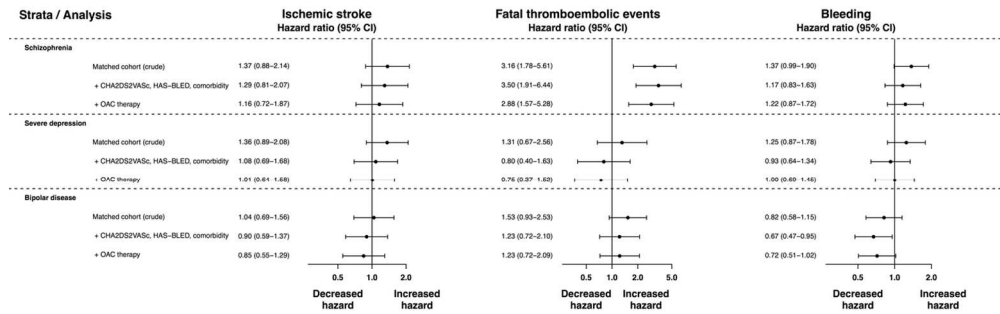

Figure 2

127x45mm (300 x 300 DPI)

Peer review only

1  
2  
3  
4  
5  
6  
7  
8  
9  
10  
11  
12  
13  
14  
15  
16  
17  
18  
19  
20  
21  
22  
23  
24  
25  
26  
27  
28  
29  
30  
31  
32  
33  
34  
35  
36  
37  
38  
39  
40  
41  
42  
43  
44  
45  
46  
47  
48  
49  
50  
51  
52  
53  
54  
55  
56  
57  
58  
59  
60

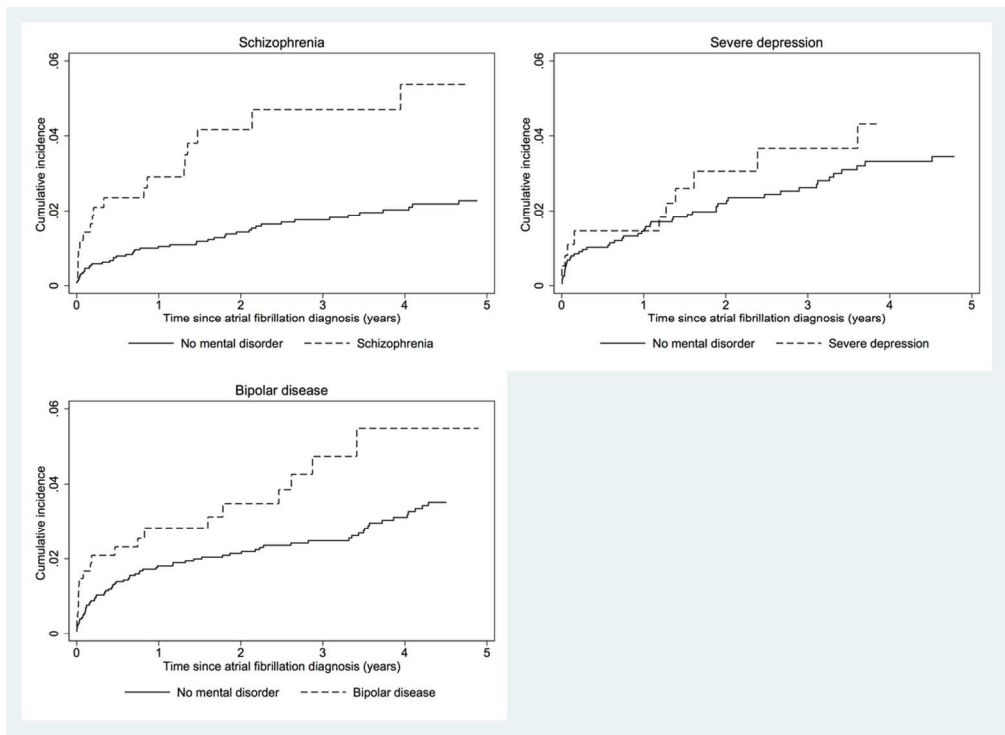

Figure 3

101x73mm (300 x 300 DPI)

Review only

1  
2  
3  
4  
5  
6  
7  
8  
9  
10  
11  
12  
13  
14  
15  
16  
17  
18  
19  
20  
21  
22  
23  
24  
25  
26  
27  
28  
29  
30  
31  
32  
33  
34  
35  
36  
37  
38  
39  
40  
41  
42  
43  
44  
45  
46  
47  
48  
49  
50  
51  
52  
53  
54  
55  
56  
57  
58  
59  
60

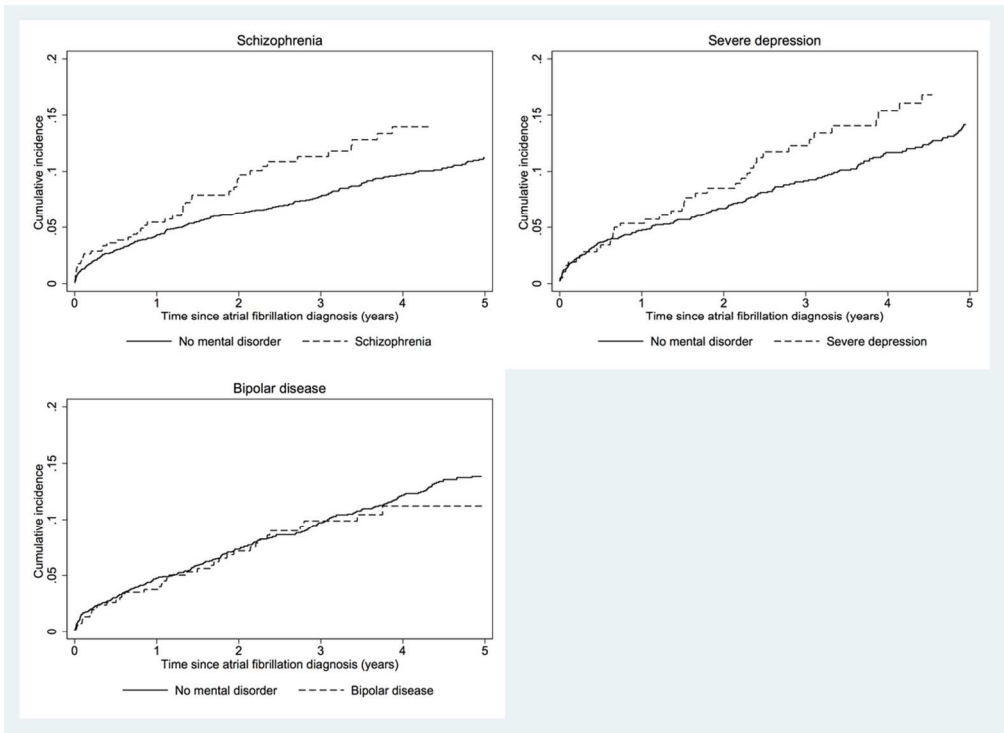

Figure 4

101x73mm (300 x 300 DPI)

Review only



## SUPPLEMENTAL INFORMATION

### **Atrial fibrillation in patients with severe mental disorders and the risk of stroke, fatal thromboembolic events, and bleeding: a nationwide cohort study**

Mette Søgaard, PhD<sup>1,2</sup>, Flemming Skjøth, PhD<sup>2,3</sup>, Jette Nordstrom Kjældgaard<sup>1,2</sup>, BSCEE, Torben Bjerregaard Larsen, PhD<sup>1,2,5</sup>, Søren Pihlkjær Hjortshøj, PhD<sup>4,5</sup>, Sam Riahi, PhD<sup>1,4,5</sup>

<sup>1</sup>Department of Cardiology, Aalborg University Hospital, Denmark

<sup>2</sup>Aalborg Thrombosis Research Unit, Department of Clinical Medicine, Faculty of Health, Aalborg University, Aalborg, Denmark

<sup>3</sup>Unit for Clinical Biostatistics, Aalborg University Hospital, Denmark

<sup>4</sup>Department of Clinical Medicine, Aalborg University, Denmark

<sup>5</sup>AF-Study group, Aalborg University Hospital, Denmark

#### **Supplementary tables and figures**

Supplementary Table 1: Definitions on comorbidity, concomitant medications, and study outcomes according to ICD-10 codes and ATC-codes.

Supplementary Table 2: Risk score definitions

Supplementary Table 3: Descriptive characteristics of AF patients with schizophrenia, severe depression, or bipolar disease and their matched comparison cohorts.

Supplementary Figure 1: Flowchart of the study population.

Supplementary Figure 2: Cumulative incidence curves of initiation of oral anticoagulation therapy in age, sex and calendar time matched atrial fibrillation patients with and without mental disorders.

**Supplementary Table 1.** Definitions on comorbidity, concomitant medication, and study outcomes according to ICD-10 codes and ATC-codes.

| <b>Diagnoses</b>                     | <b>International Classification of Diseases 10th revision (ICD-10) code</b>                                                                | <b>Anatomical Therapeutic Chemical (ATC) code</b> |
|--------------------------------------|--------------------------------------------------------------------------------------------------------------------------------------------|---------------------------------------------------|
| <b>Study population</b>              |                                                                                                                                            |                                                   |
| Atrial fibrillation                  | I48                                                                                                                                        |                                                   |
| <b>Exposure</b>                      |                                                                                                                                            |                                                   |
| Schizophrenia                        | F20                                                                                                                                        |                                                   |
| Bipolar disease                      | F30 F31                                                                                                                                    |                                                   |
| Severe depression                    | F322 F323 F332 F333                                                                                                                        |                                                   |
| <b>Outcomes</b>                      |                                                                                                                                            |                                                   |
| Ischemic stroke                      | I63 I64                                                                                                                                    |                                                   |
| Major bleeding                       | I60 I61 I62 K250 K252 K254<br>K260 K262 K264 K270 K272<br>K274 K280 K282 K290 K920<br>K921 K922 D62 J942 H113 H356<br>H431 N02 R04 R31 R58 |                                                   |
| Thromboembolic events                |                                                                                                                                            |                                                   |
| Ischemic stroke                      | I63 I64                                                                                                                                    |                                                   |
| Systemic embolism                    | I74                                                                                                                                        |                                                   |
| Pulmonary embolism                   | I26                                                                                                                                        |                                                   |
| Myocardial infarction                | I21 I23                                                                                                                                    |                                                   |
| <b>Baseline covariates</b>           |                                                                                                                                            |                                                   |
| Heart failure                        | I110 I130 I132 I420 I50                                                                                                                    |                                                   |
| Hypertension                         |                                                                                                                                            | See specified definition <sup>a</sup>             |
| Peripheral vascular/ischemic disease | I702 I703 I704 I705 I706 I707<br>I708 I709 I71 I739                                                                                        |                                                   |
| Diabetes                             | E100 E101 E109 E110 E111 E119                                                                                                              | A10                                               |
| Prior bleeding                       | K250 K252 K254 K260 K262<br>K264 K270 K272 K274 K280                                                                                       |                                                   |

|                                                  |                                                                                                              |                                                                              |
|--------------------------------------------------|--------------------------------------------------------------------------------------------------------------|------------------------------------------------------------------------------|
|                                                  | K282 K290 K920 K921 K922 D62<br>J942 H113 H356 H431 N02 R04<br>R31 R58                                       |                                                                              |
| Renal dysfunction                                | I12 I13 N00 N01 N02 N03 N04<br>N05 N07 N11 N14 N17 N18 N19<br>Q61                                            |                                                                              |
| Prior VTE                                        | I801 I802 I803 I808 I809 I819<br>I636 I676 I822 I823 I828 I829                                               |                                                                              |
| Chronic pulmonary disease                        | J40 J41 J42 J43 J44 J45 J46 J47<br>J60 J61 J62 J63 J64 J65 J67 J684<br>J701 J703 J841 J920 J961 J982<br>J983 |                                                                              |
| Cancer                                           | C                                                                                                            |                                                                              |
| Alcohol-related disease                          | E224 E529A F10 G312 G621<br>G721 I426 K292 K70 K860<br>L278A O354 T51 Z714 Z721                              |                                                                              |
| Medications within 365 days<br>before index date |                                                                                                              |                                                                              |
| Coumarin                                         |                                                                                                              | B01AA                                                                        |
| NOAC                                             |                                                                                                              | B01AF01 B01AF02 B01AE07                                                      |
| Aspirin                                          |                                                                                                              | B01AC06                                                                      |
| Clopidogrel                                      |                                                                                                              | B01AC04                                                                      |
| NSAID                                            |                                                                                                              | M01A                                                                         |
| Digoxin                                          |                                                                                                              | C01AA05                                                                      |
| Non-loop diuretics                               |                                                                                                              | C02DA C02L C03A C03B C03D<br>C03E C03X C07C C07D C08G<br>C09BA C09DA C09XA52 |
| Loop-diuretics                                   |                                                                                                              | C03C                                                                         |
| Beta-blocker                                     |                                                                                                              | C07                                                                          |
| Calcium channel blocker                          |                                                                                                              | C07F C08 C09BB C09DB                                                         |
| Renin-angiotensin inhibitor                      |                                                                                                              | C09                                                                          |
| Statins                                          |                                                                                                              | C10                                                                          |

Abbreviations: VTE, venous thromboembolism; NOAC, Non-vitamin K oral anticoagulant; NSAID, Non-steroidal anti-inflammatory drugs.

<sup>a</sup>We identified subjects with hypertension from combination treatment with at least two of the following classes of antihypertensive drugs:

I- Alpha adrenergic blockers (C02A, C02B, C02C)

1  
2  
3  
4  
5  
6  
7  
8  
9  
10  
11  
12  
13  
14  
15  
16  
17  
18  
19  
20  
21  
22  
23  
24  
25  
26  
27  
28  
29  
30  
31  
32  
33  
34  
35  
36  
37  
38  
39  
40  
41  
42  
43  
44  
45  
46  
47  
48  
49  
50  
51  
52  
53  
54  
55  
56  
57  
58  
59  
60

II· Non-loop diuretics (C02DA, C02L, C03A, C03B, C03D, C03E, C03X, C07C, C07D, C08G, C09BA, C09DA, C09XA52)

III· Vasodilators (C02DB, C02DD, C02DG, C04, C05)

IV· Beta blockers (C07)

V· Calcium channel blockers (C07F, C08, C09BB, C09DB)

VI· Renin-angiotensin system inhibitors (C09)

For peer review only

Supplementary Table 2. Risk score definitions.

| Risk score                                                                              | Points if present |
|-----------------------------------------------------------------------------------------|-------------------|
| CHA <sub>2</sub> DS <sub>2</sub> VASc <sup>a</sup>                                      |                   |
| Congestive heart failure or Left Ventricular Dysfunction                                | 1                 |
| Hypertension                                                                            | 1                 |
| Age ≥ 65 years                                                                          | 1                 |
| Age ≥ 75 years                                                                          | 1                 |
| Diabetes mellitus                                                                       | 1                 |
| Stroke (ischemic stroke, transient ischemic disease or systemic embolism)               | 2                 |
| Vascular disease (myocardial infarction, peripheral arterial disease, or aortic plaque) | 1                 |
| Sex category (female)                                                                   | 1                 |
| HAS-BLED <sup>b</sup>                                                                   |                   |
| Hypertension                                                                            | 1                 |
| Abnormal renal function                                                                 | 1                 |
| Abnormal hepatic function                                                               | 1                 |
| Stroke (ischemic stroke or transient ischemic attack)                                   | 1                 |
| Bleeding                                                                                | 1                 |
| Labile international normalized ratio <sup>c</sup>                                      | 1                 |
| Elderly age (≥ 65 years)                                                                | 1                 |
| Drugs (aspirin, clopidogrel, or non-steroidal anti-inflammatory drugs)                  | 1                 |
| Alcohol intake                                                                          | 1                 |

<sup>a</sup>Reflects stroke risk in atrial fibrillation patients not in anticoagulant therapy (Lip GYH, Nieuwlaat R, Pisters R, Lane DA, Crijns HJGM. Refining clinical risk stratification for predicting stroke and thromboembolism in atrial fibrillation using a novel risk factor-based approach: the euro heart survey on atrial fibrillation. Chest 2010;137(2):263-72)

<sup>b</sup>Reflects bleeding risk in atrial fibrillation patients undergoing anticoagulant therapy (Pisters R, Lane DA, Nieuwlaat R, de Vos CB, Crijns HJGM, Lip GYH. A novel user-friendly score (HAS-BLED) to assess 1-year risk of major bleeding in patients with atrial fibrillation: the Euro Heart Survey. Chest 2010;138(5):1093-100).

<sup>c</sup>Not included due to unavailable information

1  
2  
3  
4  
5  
6  
7  
8  
9  
10  
11  
12  
13  
14  
15  
16  
17  
18  
19  
20  
21  
22  
23  
24  
25  
26  
27  
28  
29  
30  
31  
32  
33  
34  
35  
36  
37  
38  
39  
40  
41  
42  
43  
44  
45  
46  
47  
48  
49  
50  
51  
52  
53  
54  
55  
56  
57  
58  
59  
60

Supplementary Figure 1. Flowchart of the study population.

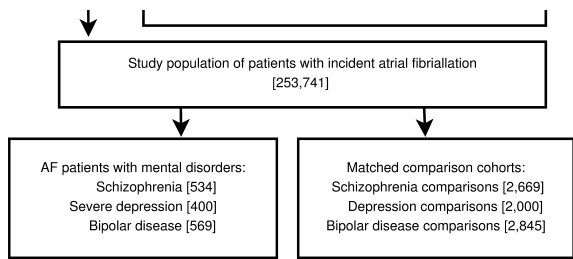

For peer review only

**Supplementary Table 3.** Descriptive characteristics of AF patients with schizophrenia, severe depression, or bipolar disease and their matched comparison cohorts.

| Characteristic, % (N)                                 | Schizophrenia          |               | Severe depression      |                   | Bipolar disease        |                 |
|-------------------------------------------------------|------------------------|---------------|------------------------|-------------------|------------------------|-----------------|
|                                                       | Matched AF comparisons | Schizophrenia | Matched AF comparisons | Severe depression | Matched AF comparisons | Bipolar disease |
| Total number                                          | 2,669                  | 534           | 2,000                  | 400               | 2,845                  | 569             |
| Females                                               | 45.7 (1,219)           | 45.7 (244)    | 61.8 (1,235)           | 61.8 (247)        | 59.6 (1,695)           | 59.6 (339)      |
| Mean age (SD)                                         | 64.5 (13.7)            | 64.5 (13.7)   | 73.5 (14.0)            | 73.7 (14.0)       | 73.1 (11.2)            | 73.0 (11.2)     |
| Mean CHA <sub>2</sub> DS <sub>2</sub> VASc score (SD) | 2.3 (1.8)              | 2.5 (1.7)     | 3.3 (1.8)              | 3.6 (2.0)         | 3.2 (1.8)              | 3.3 (1.8)       |
| Mean HASBLED score (SD)                               | 1.8 (1.3)              | 1.9 (1.3)     | 2.2 (1.2)              | 2.5 (1.4)         | 2.2 (1.2)              | 2.5 (1.3)       |
| Prior stroke                                          | 13.3 (355)             | 14.2 (76)     | 17.9 (358)             | 30.3 (121)        | 17.8 (505)             | 20.2 (115)      |
| Heart failure                                         | 19.4 (518)             | 30.0 (160)    | 23.4 (469)             | 30.3 (121)        | 25.3 (720)             | 29.3 (167)      |
| Hypertension                                          | 38.6 (1030)            | 26.6 (142)    | 44.1 (882)             | 44.5 (178)        | 45.2 (1287)            | 36.6 (208)      |
| Myocardial infarction                                 | 6.9 (185)              | 8.2 (44)      | 10.7 (213)             | 11.3 (45)         | 9.6 (273)              | 9.3 (53)        |
| Peripheral arterial disease                           | 5.7 (152)              | 6.7 (36)      | 8.1 (161)              | 10.0 (40)         | 7.1 (201)              | 9.0 (51)        |
| Diabetes                                              | 12.9 (344)             | 24.3 (130)    | 12.9 (259)             | 15.8 (63)         | 12.6 (358)             | 20.2 (115)      |
| Prior bleeding                                        | 13.0 (346)             | 28.1 (150)    | 15.4 (307)             | 24.0 (96)         | 14.4 (409)             | 23.0 (131)      |
| Renal dysfunction                                     | 4.8 (127)              | 10.1 (54)     | 4.1 (82)               | 8.5 (34)          | 5.1 (144)              | 15.8 (90)       |
| Prior venous thromboembolism                          | 4.8 (128)              | 7.3 (39)      | 5.9 (119)              | 10.8 (43)         | 4.7 (135)              | 10.0 (57)       |
| Chronic pulmonary disease                             | 13.3 (355)             | 28.7 (153)    | 14.9 (299)             | 22.3 (89)         | 16.1 (458)             | 30.8 (175)      |
| Cancer                                                | 12.9 (345)             | 12.9 (69)     | 17.9 (357)             | 14.8 (59)         | 17.3 (493)             | 17.0 (97)       |
| Alcohol-related disease                               | 5.9 (158)              | 19.1 (102)    | 3.6 (73)               | 11.0 (44)         | 4.3 (122)              | 20.9 (119)      |

|    |                                                      |            |            |            |            |             |            |
|----|------------------------------------------------------|------------|------------|------------|------------|-------------|------------|
| 1  |                                                      |            |            |            |            |             |            |
| 2  | Coumarin                                             | 13.3 (356) | 5.1 (27)   | 13.7 (273) | 8.8 (35)   | 14.3 (407)  | 12.1 (69)  |
| 3  |                                                      |            |            |            |            |             |            |
| 4  | NOAC                                                 | 3.7 (99)   | 3.4 (18)   | 2.8 (56)   | 2.3 (9)    | 3.4 (98)    | 2.3 (13)   |
| 5  |                                                      |            |            |            |            |             |            |
| 6  | Aspirin                                              | 29.6 (790) | 33.0 (176) | 37.2 (744) | 40.5 (162) | 37.7 (1073) | 38.1 (217) |
| 7  |                                                      |            |            |            |            |             |            |
| 8  | Clopidogrel                                          | 4.3 (116)  | 5.6 (30)   | 5.3 (106)  | 9.0 (36)   | 5.0 (143)   | 5.6 (32)   |
| 9  |                                                      |            |            |            |            |             |            |
| 10 | NSAID                                                | 27.1 (722) | 25.1 (134) | 27.1 (542) | 27.3 (109) | 26.2 (745)  | 25.0 (142) |
| 11 |                                                      |            |            |            |            |             |            |
| 12 | Digoxin                                              | 6.8 (182)  | 9.9 (53)   | 9.3 (187)  | 8.8 (35)   | 10.7 (304)  | 12.1 (69)  |
| 13 |                                                      |            |            |            |            |             |            |
| 14 | Non-loop diuretics                                   | 31.4 (839) | 25.1 (134) | 38.2 (764) | 38.8 (155) | 38.3 (1089) | 34.4 (196) |
| 15 |                                                      |            |            |            |            |             |            |
| 16 | Loop-diuretics                                       | 18.7 (500) | 34.8 (186) | 24.4 (488) | 28.8 (115) | 23.7 (675)  | 36.0 (205) |
| 17 |                                                      |            |            |            |            |             |            |
| 18 | Beta-blocker                                         | 31.4 (837) | 22.7 (121) | 33.8 (676) | 28.0 (112) | 34.4 (980)  | 24.3 (138) |
| 19 |                                                      |            |            |            |            |             |            |
| 20 | Calcium channel blocker                              | 22.1 (591) | 17.0 (91)  | 27.1 (543) | 31.0 (124) | 26.5 (753)  | 25.1 (143) |
| 21 |                                                      |            |            |            |            |             |            |
| 22 | Renin-angiotensin inhibitor                          | 34.2 (914) | 23.8 (127) | 37.0 (741) | 37.5 (150) | 39.2 (1115) | 32.0 (182) |
| 23 |                                                      |            |            |            |            |             |            |
| 24 | Statins                                              | 26.4 (704) | 23.2 (124) | 26.6 (531) | 26.0 (104) | 28.3 (804)  | 27.4 (156) |
| 25 |                                                      |            |            |            |            |             |            |
| 26 | Antiepileptics                                       | 3.6 (95)   | 24.3 (130) | 4.7 (94)   | 16.0 (64)  | 4.5 (129)   | 39.5 (225) |
| 27 |                                                      |            |            |            |            |             |            |
| 28 | Anticholinergics                                     | <4         | <4         | 0.2 (4)    | 2.3 (9)    | 0.1 (4)     | 5.3 (30)   |
| 29 |                                                      |            |            |            |            |             |            |
| 30 | Antipsychotics, lithium and<br>anxiolytics/hypnotics | 21.4 (571) | 87.1 (465) | 26.6 (532) | 63.2 (253) | 28.8 (820)  | 83.3 (474) |
| 31 |                                                      |            |            |            |            |             |            |
| 32 | Antidepressants                                      | 14.1 (375) | 34.8 (186) | 16.1 (323) | 78.5 (314) | 15.9 (453)  | 61.0 (347) |

Abbreviations:

SD: Standard deviation

NOAC: Non-vitamin K oral anticoagulant

NSAID: Non-steroidal anti-inflammatory drugs



**Supplementary Figure 2.** Cumulative incidence curves of initiation of oral anticoagulation therapy in age, sex and calendar time matched atrial fibrillation patients with and without mental disorders.

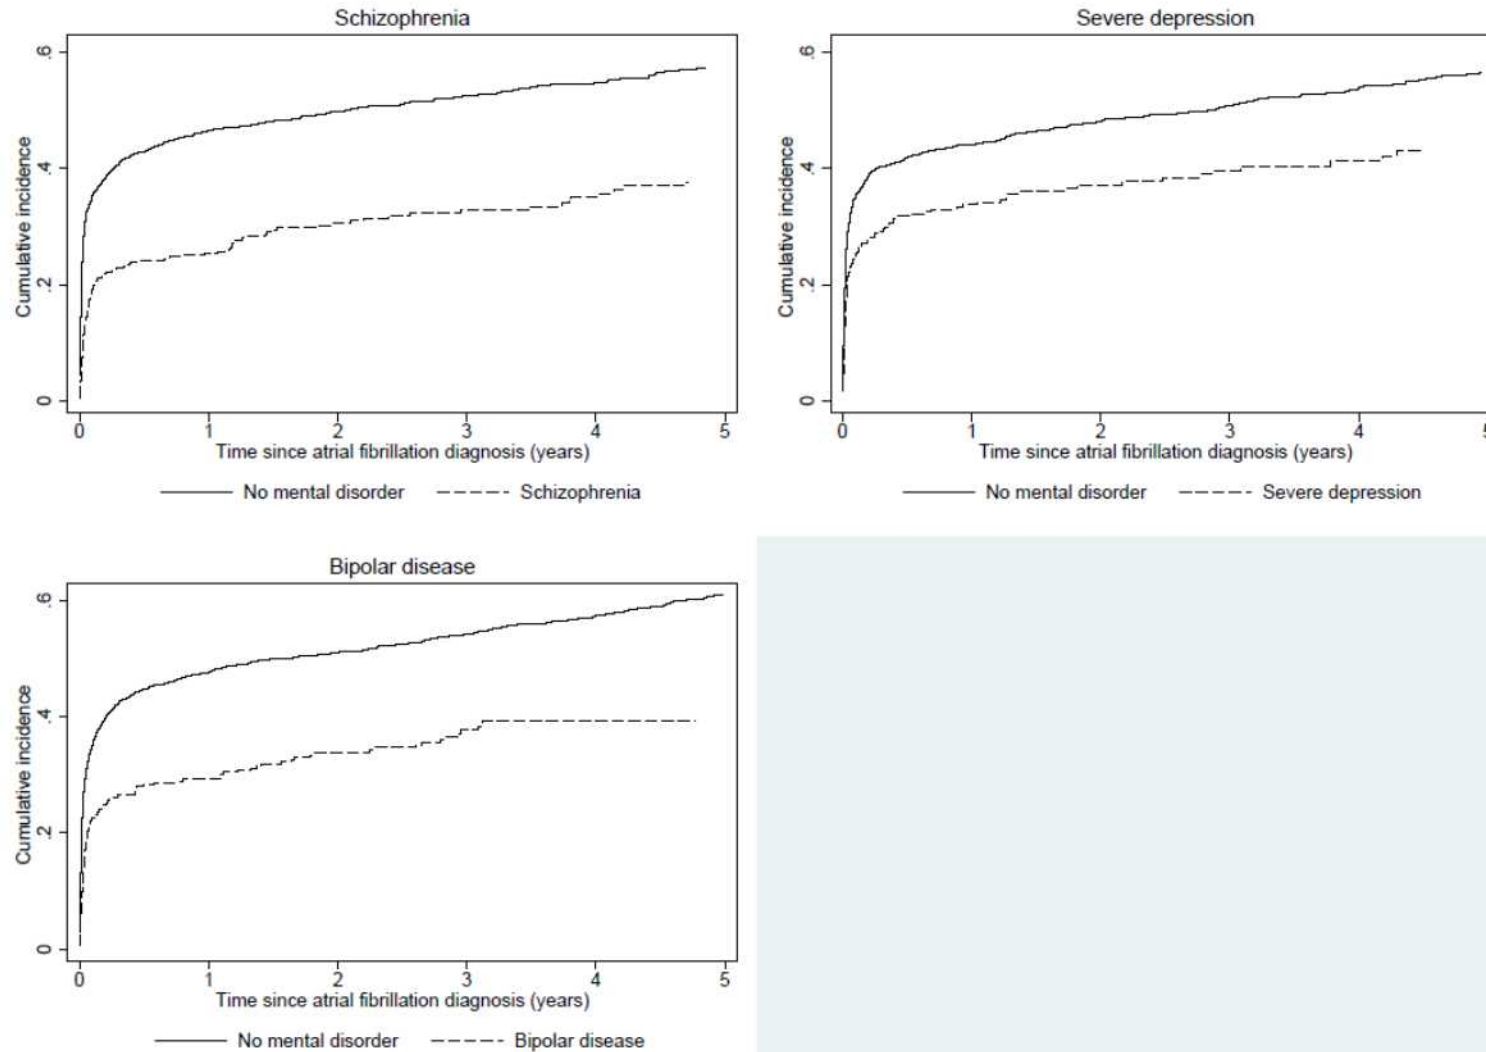

## STROBE (Strengthening The Reporting of OBServational Studies in Epidemiology) Checklist

A checklist of items that should be included in reports of observational studies. You must report the page number in your manuscript where you consider each of the items listed in this checklist. If you have not included this information, either revise your manuscript accordingly before submitting or note N/A.

**Note:** An Explanation and Elaboration article discusses each checklist item and gives methodological background and published examples of transparent reporting. The STROBE checklist is best used in conjunction with this article (freely available on the Web sites of PLoS Medicine at <http://www.plosmedicine.org/>, Annals of Internal Medicine at <http://www.annals.org/>, and Epidemiology at <http://www.epidem.com/>). Information on the STROBE Initiative is available at [www.strobe-statement.org](http://www.strobe-statement.org).

| Section and Item     | Item No. | Recommendation                                                                                                                                                                                                                                                                                                                                                                                                                                                                 | Reported on Page No. |
|----------------------|----------|--------------------------------------------------------------------------------------------------------------------------------------------------------------------------------------------------------------------------------------------------------------------------------------------------------------------------------------------------------------------------------------------------------------------------------------------------------------------------------|----------------------|
| Title and Abstract   | 1        | (a) Indicate the study's design with a commonly used term in the title or the abstract                                                                                                                                                                                                                                                                                                                                                                                         |                      |
|                      |          | (b) Provide in the abstract an informative and balanced summary of what was done and what was found                                                                                                                                                                                                                                                                                                                                                                            |                      |
| <b>Introduction</b>  |          |                                                                                                                                                                                                                                                                                                                                                                                                                                                                                |                      |
| Background/Rationale | 2        | Explain the scientific background and rationale for the investigation being reported                                                                                                                                                                                                                                                                                                                                                                                           |                      |
| Objectives           | 3        | State specific objectives, including any prespecified hypotheses                                                                                                                                                                                                                                                                                                                                                                                                               |                      |
| <b>Methods</b>       |          |                                                                                                                                                                                                                                                                                                                                                                                                                                                                                |                      |
| Study Design         | 4        | Present key elements of study design early in the paper                                                                                                                                                                                                                                                                                                                                                                                                                        |                      |
| Setting              | 5        | Describe the setting, locations, and relevant dates, including periods of recruitment, exposure, follow-up, and data collection                                                                                                                                                                                                                                                                                                                                                |                      |
| Participants         | 6        | (a) <i>Cohort study</i> —Give the eligibility criteria, and the sources and methods of selection of participants. Describe methods of follow-up<br><br><i>Case-control study</i> —Give the eligibility criteria, and the sources and methods of case ascertainment and control selection. Give the rationale for the choice of cases and controls<br><br><i>Cross-sectional study</i> —Give the eligibility criteria, and the sources and methods of selection of participants |                      |
|                      |          | (b) <i>Cohort study</i> —For matched studies, give matching criteria and number of exposed and unexposed<br><br><i>Case-control study</i> —For matched studies, give matching criteria and the number of controls per case                                                                                                                                                                                                                                                     |                      |
| Variables            | 7        | Clearly define all outcomes, exposures, predictors, potential confounders, and effect modifiers. Give diagnostic criteria, if applicable                                                                                                                                                                                                                                                                                                                                       |                      |

| Section and Item             | Item No. | Recommendation                                                                                                                                                                                                                                                                                            | Reported on Page No. |
|------------------------------|----------|-----------------------------------------------------------------------------------------------------------------------------------------------------------------------------------------------------------------------------------------------------------------------------------------------------------|----------------------|
| Data Sources/<br>Measurement | 8*       | For each variable of interest, give sources of data and details of methods of assessment (measurement). Describe comparability of assessment methods if there is more than one group                                                                                                                      |                      |
| Bias                         | 9        | Describe any efforts to address potential sources of bias                                                                                                                                                                                                                                                 |                      |
| Study Size                   | 10       | Explain how the study size was arrived at                                                                                                                                                                                                                                                                 |                      |
| Quantitative Variables       | 11       | Explain how quantitative variables were handled in the analyses. If applicable, describe which groupings were chosen and why                                                                                                                                                                              |                      |
| Statistical Methods          | 12       | (a) Describe all statistical methods, including those used to control for confounding                                                                                                                                                                                                                     |                      |
|                              |          | (b) Describe any methods used to examine subgroups and interactions                                                                                                                                                                                                                                       |                      |
|                              |          | (c) Explain how missing data were addressed                                                                                                                                                                                                                                                               |                      |
|                              |          | (d) <i>Cohort study</i> —If applicable, explain how loss to follow-up was addressed<br><i>Case-control study</i> —If applicable, explain how matching of cases and controls was addressed<br><i>Cross-sectional study</i> —If applicable, describe analytical methods taking account of sampling strategy |                      |
|                              |          | (e) Describe any sensitivity analyses                                                                                                                                                                                                                                                                     |                      |
| <b>Results</b>               |          |                                                                                                                                                                                                                                                                                                           |                      |
| Participants                 | 13*      | (a) Report numbers of individuals at each stage of study—eg numbers potentially eligible, examined for eligibility, confirmed eligible, included in the study, completing follow-up, and analysed                                                                                                         |                      |
|                              |          | (b) Give reasons for non-participation at each stage                                                                                                                                                                                                                                                      |                      |
|                              |          | (c) Consider use of a flow diagram                                                                                                                                                                                                                                                                        |                      |
| Descriptive Data             | 14*      | (a) Give characteristics of study participants (eg demographic, clinical, social) and information on exposures and potential confounders                                                                                                                                                                  |                      |
|                              |          | (b) Indicate number of participants with missing data for each variable of interest                                                                                                                                                                                                                       |                      |
|                              |          | (c) <i>Cohort study</i> —Summarise follow-up time (eg, average and total amount)                                                                                                                                                                                                                          |                      |
| Outcome Data                 | 15*      | <i>Cohort study</i> —Report numbers of outcome events or summary measures over time                                                                                                                                                                                                                       |                      |
|                              |          | <i>Case-control study</i> —Report numbers in each exposure category, or summary measures of exposure                                                                                                                                                                                                      |                      |
|                              |          | <i>Cross-sectional study</i> —Report numbers of outcome events or summary measures                                                                                                                                                                                                                        |                      |

| Section and Item         | Item No. | Recommendation                                                                                                                                                                                               | Reported on Page No. |
|--------------------------|----------|--------------------------------------------------------------------------------------------------------------------------------------------------------------------------------------------------------------|----------------------|
| Main Results             | 16       | (a) Give unadjusted estimates and, if applicable, confounder-adjusted estimates and their precision (eg, 95% confidence interval). Make clear which confounders were adjusted for and why they were included |                      |
|                          |          | (b) Report category boundaries when continuous variables were categorized                                                                                                                                    |                      |
|                          |          | (c) If relevant, consider translating estimates of relative risk into absolute risk for a meaningful time period                                                                                             |                      |
| Other Analyses           | 17       | Report other analyses done—eg analyses of subgroups and interactions, and sensitivity analyses                                                                                                               |                      |
| <b>Discussion</b>        |          |                                                                                                                                                                                                              |                      |
| Key Results              | 18       | Summarise key results with reference to study objectives                                                                                                                                                     |                      |
| Limitations              | 19       | Discuss limitations of the study, taking into account sources of potential bias or imprecision. Discuss both direction and magnitude of any potential bias                                                   |                      |
| Interpretation           | 20       | Give a cautious overall interpretation of results considering objectives, limitations, multiplicity of analyses, results from similar studies, and other relevant evidence                                   |                      |
| Generalisability         | 21       | Discuss the generalisability (external validity) of the study results                                                                                                                                        |                      |
| <b>Other Information</b> |          |                                                                                                                                                                                                              |                      |
| Funding                  | 22       | Give the source of funding and the role of the funders for the present study and, if applicable, for the original study on which the present article is based                                                |                      |

\*Give information separately for cases and controls in case-control studies and, if applicable, for exposed and unexposed groups in cohort and cross-sectional studies.

**Once you have completed this checklist, please save a copy and upload it as part of your submission. DO NOT include this checklist as part of the main manuscript document. It must be uploaded as a separate file.**

# BMJ Open

## Atrial fibrillation in patients with severe mental disorders and the risk of stroke, and fatal thromboembolic events, and bleeding: a nationwide cohort study

|                                 |                                                                                                                                                                                                                                                                                                                                                                    |
|---------------------------------|--------------------------------------------------------------------------------------------------------------------------------------------------------------------------------------------------------------------------------------------------------------------------------------------------------------------------------------------------------------------|
| Journal:                        | <i>BMJ Open</i>                                                                                                                                                                                                                                                                                                                                                    |
| Manuscript ID                   | bmjopen-2017-018209.R2                                                                                                                                                                                                                                                                                                                                             |
| Article Type:                   | Research                                                                                                                                                                                                                                                                                                                                                           |
| Date Submitted by the Author:   | 04-Oct-2017                                                                                                                                                                                                                                                                                                                                                        |
| Complete List of Authors:       | Søgaard, Mette; Aalborg University Hospital, Skjøth, Flemming; Aalborg University Hospital, Aalborg Thrombosis Research Unit<br>Kjældgaard, Jette; Aalborg University Hospital<br>Larsen, Torben; Aalborg Hospital, Department of Cardiology<br>Hjortshøj, Søren; Aalborg University Hospital, Department of Cardiology<br>Riahi, Sam; Aalborg University Hospital |
| <b>Primary Subject Heading</b>: | Cardiovascular medicine                                                                                                                                                                                                                                                                                                                                            |
| Secondary Subject Heading:      | Mental health                                                                                                                                                                                                                                                                                                                                                      |
| Keywords:                       | Atrial fibrillation, Schizophrenia & psychotic disorders < PSYCHIATRY, Depression & mood disorders < PSYCHIATRY, bipolar disease, Stroke medicine < INTERNAL MEDICINE, outcome                                                                                                                                                                                     |
|                                 |                                                                                                                                                                                                                                                                                                                                                                    |

SCHOLARONE™  
Manuscripts

Only

1  
2  
3  
4 **Atrial fibrillation in patients with severe mental disorders and the risk of stroke,**  
5  
6  
7 **fatal thromboembolic events, and bleeding: a nationwide cohort study**  
8  
9

10  
11 Mette Søgaaard, PhD<sup>1,2</sup>, Flemming Skjøth, PhD<sup>2,3</sup>, Jette Nordstrøm Kjældgaard<sup>1,2</sup>, BSCEE, Torben

12  
13 Bjerregaard Larsen, PhD<sup>1,2,5</sup>, Søren Pihlkjær Hjortshøj, PhD<sup>4,5</sup>, Sam Riahi, PhD<sup>1,4,5</sup>  
14  
15

16  
17  
18 <sup>1</sup>Department of Cardiology, Aalborg University Hospital, Denmark  
19

20 <sup>2</sup>Aalborg Thrombosis Research Unit, Department of Clinical Medicine, Faculty of Health, Aalborg  
21

22 University, Aalborg, Denmark  
23

24 <sup>3</sup>Unit for Clinical Biostatistics, Aalborg University Hospital, Denmark  
25

26 <sup>4</sup>Department of Clinical Medicine, Aalborg University, Denmark  
27

28 <sup>5</sup>AF-Study group, Aalborg University Hospital, Denmark  
29  
30  
31  
32  
33  
34  
35

36 **Running title:** Atrial fibrillation outcomes in patients with severe mental disorders  
37  
38  
39  
40  
41

42 **Word count:** Abstract 298; text 3028.  
43  
44  
45  
46

47 **Corresponding author:**  
48

49 Mette Søgaaard, DVM, Ph.D. Sønder Skovvej 15, 9000 Aalborg, Denmark.  
50

51 Phone: +4597664386; E-mail: mette.soegaard@rn.dk  
52  
53  
54  
55  
56  
57  
58  
59  
60

## ABSTRACT

**Objectives:** Outcomes of atrial fibrillation (AF) in patients with severe mental disorders are largely unknown. We compared rates of stroke, fatal thromboembolic events, and bleeding in AF patients with and without mental disorders.

**Design:** Nationwide registry-based cohort study.

**Setting:** Denmark (population 5,6 million), 2000-2015.

**Participants:** AF patients with schizophrenia (n=534), severe depression (n=400), or bipolar disease (n=569) matched 1:5 on age, sex and calendar time to AF patients without mental disorders.

**Exposure:** Inpatient or hospital-based outpatient diagnosis of schizophrenia, severe depression or bipolar disease.

**Primary and secondary outcome measures:** Hazard ratios (HR) for stroke, fatal thromboembolic events, and major bleeding comparing patients with and without mental disorders estimated by Cox regression with sequential adjustment for risk factors for stroke and bleeding, comorbidity, and initiation of oral anticoagulant therapy (OAT).

**Results:** Compared with matched comparisons, crude 5-year HRs of ischemic stroke was 1.37 (95% confidence intervals (CI) 0.88-2.14) for schizophrenia, 1.36 (95% CI 0.89-2.08) for depression, and 1.04 (95% CI 0.69-1.56) for bipolar disease. After adjusting for risk factors, comorbidity, and OAT these HRs declined toward the null. Crude HRs of fatal thromboembolic events were 3.16 (95% CI 1.78-5.61) for schizophrenia, 1.31 (95% CI 0.67-2.56) for depression, and 1.53 (95% CI 0.93-2.53) for bipolar disease. Rates of major bleeding were increased in patients with schizophrenia (crude HRs 1.37, 95% CI 0.99-1.90) and severe depression (HR 1.25, 95% CI 0.87-1.78) but not bipolar disease (HR 0.82, 95% CI 0.58-1.15).

**Conclusion:** AF patients with schizophrenia or severe depression experienced increased rates of stroke and major bleeding compared with matched comparisons. This increase was largely

1  
2  
3  
4 explained by differences in the prevalence of risk factors for stroke and bleeding, comorbidity and  
5  
6 initiation of OAT during follow-up. AF patients with schizophrenia further experienced higher  
7  
8 mortality following thromboembolic events than matched comparisons without mental disorders.  
9  
10

11  
12 **Keywords:** Atrial fibrillation, schizophrenia, depression, bipolar disease, stroke, bleeding, outcome.  
13  
14  
15  
16  
17  
18  
19  
20  
21  
22  
23  
24  
25  
26  
27  
28  
29  
30  
31  
32  
33  
34  
35  
36  
37  
38  
39  
40  
41  
42  
43  
44  
45  
46  
47  
48  
49  
50  
51  
52  
53  
54  
55  
56  
57  
58  
59  
60

For peer review only



## STRENGTHS AND LIMITATIONS OF THIS STUDY

- The study included all patients with a hospital diagnosis of atrial fibrillation in Denmark in 2000-2015. The study had complete follow-up on all participants from the nationwide Danish Civil Registration System.
- The study was conducted in a government financed healthcare system with equal access for the entire Danish population.
- Despite equal access to tax-supported health care in Denmark, diagnoses in patients with mental disorders may have been underreported.
- The study lacked data on alcohol consumption, smoking, exercise, and other lifestyle related risk factors associated with increased risk of study outcomes. We were able to adjust for hospital diagnoses of alcohol-related conditions and other lifestyle-related diseases, but cannot exclude residual confounding.
- Finally, the data did not contain information on quality and compliance with oral anticoagulant therapy.

## INTRODUCTION

Cardiovascular diseases are highly prevalent in patients with severe mental disorders such as schizophrenia, bipolar disease and severe depression,<sup>1</sup> contributing to a 10-20 year shorter life expectancy than the general population.<sup>2</sup> Potential explanations include a high prevalence of cardiovascular risk factors such as smoking, dyslipidemia, hypertension, diabetes, and obesity.<sup>3-5</sup> In addition, antipsychotic medications may adversely affect cardiovascular disease risk via metabolic pathways involving dyslipidemia, weight gain, and diabetes.<sup>6,7</sup>

Atrial fibrillation (AF) is the most common cardiac arrhythmia, affecting up to 1-2% of the population in developed countries, and confers a substantial increased risk of stroke, heart failure and death.<sup>8</sup> Despite increasing clinical and research focus on cardiovascular diseases in AF patients with mental disorders, the stroke risk in patients with mental disorders is largely unknown. Prior studies have shown that AF patients with mental disorders are less likely to start oral anticoagulant therapy (OAT) than those without,<sup>9,10</sup> and that those who receive OAT have worse anticoagulation control<sup>9,11,12</sup> and increased risk of major haemorrhage.<sup>11,13</sup> However, these studies only assessed outcomes in patients receiving OAT for at least 100-180 days, excluding patients who never initiated therapy and those who discontinued therapy shortly after initiation.<sup>11,13</sup>

We aimed to examine the prognostic importance of severe mental disorders in AF patients. In a nationwide cohort of patients with incident AF, we conceived a matched cohort study to compare the risk of stroke, fatal thromboembolic events, and major bleeding in AF patients with a prior diagnosis of schizophrenia, severe depression, or bipolar disease to matched comparison cohorts without these disorders. By sequentially adjusting for stroke risk factors, bleeding risk factors, comorbidity, and use of OAT, we sought to further characterize the association between mental disorders and AF outcomes.

## METHODS

### Data sources

This cohort study linked three well-established Danish registries nationwide; the National Patient Register<sup>14</sup>, the National Prescription Register<sup>15</sup>, and the Civil Registration System.<sup>16</sup> The National Patient Register holds information on dates of admission and discharge, and discharge diagnoses classified according to the *International Classification of Diseases (ICD)* for more than 99% of hospital admissions in Denmark. The Prescription Registry contains data on all prescription purchases by Danish residents since 1995. Data includes the patients' civil registration number, date of dispensing, and type and quantity of drug prescribed. The Danish Person Registry holds data on sex, date of birth, vital and emigration status. Supplementary Table 1 provides information on codes for all diagnoses and medications. The registries were linked using the unique personal civil registration number assigned to all Danish residents, allowing a true population-based study covering all 5,6 million inhabitants of Denmark during the study period. We performed all linkages within Statistics Denmark, a governmental institution that collects and processes information for statistical and scientific purposes.<sup>17</sup> The study was approved by the Danish Data Protection Agency (Record number 2012-41-0633). According to Danish law, approval from an ethics committee is not required for anonymous registry-based studies.

### Study population

We established a cohort of all patients with incident non-valvular AF, defining non-valvular AF as presence of AF, and baseline absence of mitral stenosis or mechanical heart valves. Specifically, we identified all patients discharged with a first hospital diagnosis of non-valvular AF between 2000 and 2015. To ensure sufficient clinical record history for treatment and diagnoses, we excluded patients who had not been residents in Denmark for at least 1 year before date of AF diagnosis

1  
2  
3  
4 (index date). We further excluded patients with valvular AF; patients who died on the day of AF  
5  
6 diagnosis; and patients with a fatal thromboembolic event defined as death within the following 30  
7  
8 days of ischemic stroke, systemic embolism, pulmonary embolism or myocardial infarction before  
9  
10 AF diagnosis (Supplementary Figure 1). The positive predictive value (PPV) of an AF diagnosis in  
11  
12 the National Patient Register is 95% (95% CI 89-98).<sup>18</sup>  
13  
14

### 15 16 17 **Exposure**

18  
19 Through the National Patient Register, we identified all patients in the study population with an  
20  
21 inpatient or outpatient diagnosis of schizophrenia, bipolar disease or severe depression before the  
22  
23 index date. In Denmark, these mental disorders are primarily treated in public hospitals ensuring a  
24  
25 high coverage of contacts with psychiatric disorders. The PPV of a diagnosis of mental disorders in  
26  
27 the National Patient Register is 98% (95% CI 90-99).<sup>18</sup>  
28  
29  
30  
31  
32

33  
34 To control for confounding by reducing imbalance in the data and thereby model dependence and  
35  
36 bias, we used Coarsened Exact Matching to produce a one-to-five match of patients with  
37  
38 schizophrenia, severe depression, or bipolar disease on age, sex and calendar time (year of index  
39  
40 date) to comparison cohorts of AF patients without mental disorders.<sup>19</sup> Patients age was grouped in  
41  
42 approximately 5-year intervals based on the statistical software package Stata's (Stata Corp, version  
43  
44 14) function *cem*'s algorithm for automatic coarsening.<sup>20</sup> To evaluate the effect of matching on the  
45  
46 balance between baseline variables we estimated the absolute standardized differences before and  
47  
48 after matching.  
49  
50  
51  
52  
53  
54  
55  
56  
57  
58  
59  
60

### **Patient characteristics**

Baseline comorbidity was defined according to medication claims within the year before the AF diagnosis and/or history of primary or secondary hospital discharge diagnoses (excluding emergency room diagnoses) since 1994. Comorbidity information included cardiovascular and metabolic diseases, and lifestyle related diseases (e.g. alcohol-related diseases such as alcoholic liver disease, and alcoholic polyneuropathy, cardiomyopathy, gastritis or myopathy, and alcohol-induced pancreatitis). We further combined baseline information into the CHA<sub>2</sub>DS<sub>2</sub>VASc stroke risk score<sup>21</sup> to summarize perceived stroke risk at baseline, and the HAS-BLED score<sup>22</sup> as a measure of bleeding risk at baseline (see score definitions in Supplementary Table 2).

### **Outcomes**

Study outcomes were ischemic stroke, fatal thromboembolic events of ischemic stroke, systemic embolism, pulmonary embolism or myocardial infarction (as defined above), and major bleeding events recorded as intracranial, gastro-intestinal, and major bleeding in various anatomical positions and reported in total as 'any bleeding'. We derived all outcomes from hospital diagnoses in the National Patient Register. Stroke diagnoses were required to be primary in-hospital codes, excluding emergency room and ambulatory diagnoses, to ensure higher validity.

### **Statistical analyses**

We followed all patients from their AF diagnosis and up to five years after baseline. Follow-up was censored at time of death, migration, study end (November 21, 2016), or the outcome of interest, whichever came first. Patient baseline characteristics were presented as proportions for discrete variables and means with standard deviations (SD) for continuous variables. Crude incidence rates were calculated as number of events divided by person-time. Cumulative incidence functions (by

1  
2  
3  
4 means of the Aalen-Johansen estimator), assuming death as competing risk, were used to depict risk  
5  
6 of outcome during follow-up. We assessed the association between each mental disorder and study  
7  
8 outcome using Cox Proportional hazard regression with stratification on the matched groups. To  
9  
10 assess to which extent the observed association could be explained by comorbidity and/or use of  
11  
12 OAT, we performed sequential cumulative adjustment for 1) stroke risk and bleeding risk as  
13  
14 summarized by components of the CHA<sub>2</sub>DS<sub>2</sub>VASc and HAS-BLED scores, and comorbidities not  
15  
16 included in CHA<sub>2</sub>DS<sub>2</sub>VASc and HAS-BLED (chronic pulmonary disease, cancer, and venous  
17  
18 thromboembolism), and 2) use of OAT during follow-up modelled as a time-varying covariate  
19  
20 shifting from untreated to treated status at first observed prescription of any OAC. We excluded age  
21  
22 and sex in the CHA<sub>2</sub>DS<sub>2</sub>VASc and HAS-BLED scores as these were included as matching factors  
23  
24 and perfectly balanced between comparison cohorts (Supplementary Table 3). The distribution of  
25  
26 time to OAC treatment initiation was presented by cumulative incidence curves (Supplementary  
27  
28 Figure 2). Point estimates were reported with 95% confidence intervals (CI) and a p-value less than  
29  
30  
31  
32  
33 0.05 was considered statistically significant.  
34  
35  
36  
37  
38  
39  
40  
41  
42  
43  
44  
45  
46  
47  
48  
49  
50  
51  
52  
53  
54  
55  
56  
57  
58  
59  
60

## RESULTS

We identified 260,974 AF patients during the study period. After exclusions, the study cohort comprised 253,741 AF patients of which 534 patients had schizophrenia, 400 had severe depression, and 569 had bipolar disease (Supplementary Figure 1). Table 1 shows baseline characteristics according to presence and type of mental disorder. AF patients with schizophrenia were substantially younger (mean age 64.5 years) whereas the age of patients with severe depression (73.7 years) and bipolar disease (73.0 years) was comparable with patients without mental disorders (73.3 years). Baseline stroke risk appeared lower in patients with schizophrenia; the mean CHA<sub>2</sub>DS<sub>2</sub>-VASc score was 2.5 versus 3.1 in patients without mental disorders. However, this was explained by the lower age of schizophrenic patients. The CHA<sub>2</sub>DS<sub>2</sub>-VASc score was 3.6 in patients with severe depression and 3.3 in patients with bipolar disease (Table 1). The higher CHA<sub>2</sub>DS<sub>2</sub>-VASc score in patients with severe depression was primarily driven by a large proportion of females (61.8% vs. 46.7% in comparisons) and patients with prior stroke (30.3% vs. 16.9%). In comparison, 14.2% of schizophrenic patients had prior stroke; they also had lower prevalence of hypertension, myocardial infarction, and peripheral arterial disease. Compared with patients with no mental disorder, the HAS-BLED score was also higher in patients with severe depression and bipolar disease whereas it was lower in patients with schizophrenia. Alcohol-related diseases were prevalent across all mental disorders, particularly for patients with schizophrenia or bipolar disease (~20% vs. 4% in comparisons). Supplemental Table 3 shows characteristics for patients with schizophrenia, severe depression, and bipolar disease and their matched comparisons. After matching, the mean CHA<sub>2</sub>DS<sub>2</sub>-VASc score was 2.3 in AF patients without schizophrenia (Supplementary Table 3).

### Ischemic stroke

Figure 1 displays cumulative incidence curves for ischemic stroke in the matched cohorts. Rates of ischemic stroke at 5 years was 1.96 events per 100 person-years in schizophrenic AF patients vs. 1.30 in matched comparisons (Table 2), yielding a crude HR of 1.37 (95% CI 0.88-2.14) with confidence intervals including unity (Figure 2). After adjustment for stroke risk as summarized by the CHA<sub>2</sub>DS<sub>2</sub>-VASc and HAS-BLED scores and other comorbidities, this HR was 1.29 (95% CI 0.81-2.07) (Figure 2). Rates of OAT initiation in AF patients with mental disorders was substantially lower than in matched comparisons (Supplementary Figure 2), and after additional adjustment for OAT use during follow-up the HR of ischemic stroke was 1.16 (95% CI 0.72-1.87) (Figure 2). At 5-years the rate of ischemic stroke was 2.74 per 100 person-years in patients with severe depression vs. 1.93 in matched comparisons (crude HR of 1.36, 95% CI 0.89-2.08). Similar to patients with schizophrenia, the crude HR was substantially attenuated by sequential adjustment for stroke risk factors, comorbidity, and OAT (HR 1.01, 95% CI 0.64-1.58) (Figure 2). This pattern of diminishing HRs with sequential adjustment for stroke risk factors and OAT was also evident in patients with bipolar disease in whom the crude HR was 1.04 (95% CI 0.69-1.56) and the fully adjusted HR was 0.85 (95% CI 0.55-1.29). Thus, compared with AF patients without mental disorders, the fully adjusted HRs indicated comparable HRs of ischemic stroke across all mental disorders with wide CIs that crossed unity (Figure 2).

### Fatal thromboembolic events

During 5-years follow-up, 19 fatal thromboembolic events occurred in AF patients with schizophrenia, 11 in patients with severe depression, and 20 in patients with bipolar disease. Accordingly, rates of fatal thromboembolic events per 100 person-years was substantially lower than rates of ischemic stroke; 1.43 for schizophrenia vs. 0.52 in matched comparisons, 1.03 vs. 0.82



1  
2  
3  
4 for severe depression, and 1.41 vs. 0.83 for patients with bipolar disease (Table 2).

5  
6 Notwithstanding, due to the low rate in the matched comparisons, cumulative incidence curves  
7  
8 revealed distinct differences in rates of fatal thromboembolic events in patients with schizophrenia  
9  
10 vs. matched comparisons (Figure 3) and to lesser extent in patients with bipolar disease. The  
11  
12 equivalent 5-year HR was 3.16 (95% CI 1.78-5.61) decreasing to 2.88 (95% CI 1.57-5.28) after  
13  
14 adjustment for stroke risk factors, comorbidity, and OAT (Figure 2). The unadjusted HR of fatal  
15  
16 thromboembolic events in patients with severe depression vs. matched comparisons was 1.31 (95%  
17  
18 CI 0.67-2.56). After adjustment for stroke risk factors, comorbidity, and OAT, the HR was 0.75  
19  
20 (95% CI 0.37-1.52). In patients with bipolar disease the crude HR was 1.53 (95% CI 0.93-2.53)  
21  
22 compared with matched comparisons. Following sequential adjustment the HR was 1.23 (95% CI  
23  
24 0.72-2.09) (Figure 2).  
25  
26  
27  
28  
29

### 30 **Major bleeding**

31  
32 The cumulative incidence curves showed higher rates of major bleeding in patients with  
33  
34 schizophrenia and severe depression compared with their matched comparisons, whereas the curves  
35  
36 for patients with bipolar disease overlapped with the comparisons (Figure 4). At 5 years, the rate of  
37  
38 bleeding was 3.72 events per 100 person-years in schizophrenic patients vs. 2.62 in matched  
39  
40 comparisons (crude HR of 1.37, 95% CI 0.99-1.90), 4.06 per 100 person-years in patients with  
41  
42 severe depression vs. 3.24 in matched comparisons (crude HR of 1.25, 95% CI 0.87-1.78), and 2.90  
43  
44 vs. 3.27 in patients with bipolar disease (HR of 0.82, 95% CI 0.58-1.15) (Table 2, Figure 2).  
45  
46  
47

48  
49 Sequential adjustment for the components of the CHA<sub>2</sub>DS<sub>2</sub>-VASc and HAS-BLED scores  
50  
51 (including use of aspirin, NSAID and clopidogrel at baseline) and use of OAT attenuated the  
52  
53 association in patients with schizophrenia and severe depression (Figure 2).  
54  
55  
56  
57  
58  
59  
60

## DISCUSSION

### *Principal findings*

This nationwide cohort study revealed a low prevalence of severe mental disorders among patients with incident AF in Denmark. Patients with schizophrenia or severe depression experienced higher risk of ischemic stroke and major bleeding compared with matched AF patients without mental disorders, although the differences were not statistically significant. However, after sequential adjustment for stroke and bleeding risk factors, comorbidity, and use of OAT, hazard rates were comparable with matched comparisons, suggesting that the excess risk in patients with schizophrenia and severe depression derived from higher prevalence of risk factors for stroke and bleeding and differences in use of OAT. In comparison, bipolar disease was not associated with higher risk of stroke and bleeding both before and after adjustment. Few thromboembolic events occurred during follow-up. Nonetheless, we noted a substantially higher mortality after a thromboembolic event in patients with schizophrenia than in matched comparisons.

### *Strengths and limitations*

These estimates of stroke risk and thromboembolic events in AF patients are based on a nationwide cohort study conducted in a setting where virtually all medical care is provided free of charge, and with complete follow-up through nationwide registries. Nonetheless, despite universal tax-supported health care in Denmark, diagnoses in patients with mental disorders may have been underreported.<sup>23,24</sup> From the current study, we are not able to conclude whether the low prevalence of AF patients with mental disorders reflect the true picture or whether AF may be under-diagnosed in these patients. Likewise, we cannot exclude a possibility for differential misclassification of study outcomes, if stroke and thromboembolic events were under-diagnosed in patients with severe mental disorders. Such misclassification would bias our estimates toward the null. Furthermore, we included only patients with mental disorders recorded in the hospital register, and the prevalence is

1  
2  
3  
4 likely underestimated, mainly with regard to severe depression. However, we infer that the majority  
5  
6 of patients with schizophrenia and bipolar disease are in contact with the psychiatric hospital system  
7  
8 due the severity of these conditions. It is also important to note that we only had information on  
9  
10 psychiatric admissions from 1995 onwards. Thus, patients with a diagnosis before 1995 and no  
11  
12 recorded diagnosis thereafter would not be included in the exposed cohort. Lack of data on alcohol,  
13  
14 smoking, exercise, and other lifestyle related risk factors associated with increased risk of study  
15  
16 outcomes is another limitation. We were able to adjust for hospital diagnoses of alcohol-related  
17  
18 conditions and many other lifestyle-related diseases including chronic pulmonary disease, diabetes,  
19  
20 liver disease, cardiovascular disease, and cancer, which were more prevalent among patients with  
21  
22 mental disorders. Nonetheless, incomplete control for these factors likely lead to residual  
23  
24 confounding, e.g. bleeding risk due to alcohol abuse.<sup>25,26</sup> Likewise, we did not assess the association  
25  
26 between anti-psychotic medications and stroke risk in this study. Finally, use of OAT was  
27  
28 determined based on prescription redemption, which may be a limitation, as some patients may not  
29  
30 take their medications. Our data did not contain information on the quality and compliance with  
31  
32 OAT, which may be lower among patients with mental disorders due to cognitive limitations and  
33  
34 maladaptive behaviours.<sup>27</sup>  
35  
36  
37  
38  
39  
40  
41

#### 42 *Comparison with other studies*

43  
44 Our findings are concordant with two prior studies on outcomes of AF patients with mental  
45  
46 disorders receiving warfarin.<sup>11,13</sup> In a US cohort study of 9,345 Medicaid recipients receiving two or  
47  
48 more warfarin prescriptions less than 100 days apart, Schauer et al.<sup>13</sup> demonstrated HRs of 1.36  
49  
50 (95% CI 1.06-1.74) for ischemic stroke in patients with mental disorders compared with patients  
51  
52 without. In another US cohort study, Paradise et al.<sup>11</sup> showed that mental disorders was associated  
53  
54 with an increased risk of major bleeding (HR of 1.19, 95% CI 1.11-1.27) in patients with any  
55  
56  
57  
58  
59  
60

1  
2  
3  
4 mental disorder vs. propensity matched comparisons in 103,897 patients receiving warfarin for at  
5  
6 least 6 months through the Veterans Health Administration. Both studies only included patients  
7  
8 who were considered appropriate for OAT and who actually received it and remained successfully  
9  
10 on treatment for an extended period. Thus, these results may not reflect stroke risk in all patients  
11  
12 with mental disorders.  
13

14  
15  
16  
17 Our findings expand prior studies by including all AF patients regardless of OAT use. We saw a  
18  
19 noticeable lower rate of OAT initiation in patients with mental disorders compared with matched  
20  
21 comparisons, which is in line with prior studies showing that AF patients with mental disorders are  
22  
23 less likely to receive OAT.<sup>9,10</sup> Schmitt et al.<sup>10</sup> found that AF patients with mental disorders had a  
24  
25 higher prevalence of stroke risk factors and contraindications to OAT. Thus, lower treatment rates  
26  
27 in patients with mental disorders may reflect appropriate attention to bleeding risk. On the other  
28  
29 hand, when restricting to patients eligible for OAT, patients with mental disorders remained less  
30  
31 likely to receive OAT.<sup>10</sup> As the higher stroke rates in our study appeared to be due to differences in  
32  
33 stroke risk factors, comorbidity, and receipt of OAT, any disparities in the care of AF patients with  
34  
35 mental disorders requires close attention. Other studies have shown that patients with mental  
36  
37 disorders have worse OAT control.<sup>9,11,12</sup> Walker et al.<sup>9</sup> found that when prescribed warfarin, AF  
38  
39 patients with mental disorders were substantially more likely to have highly supra-therapeutic  
40  
41 International Normalized Ratio (INR) values than those without mental disorders (27.3% vs. 1.6%  
42  
43 had at least one INR measurement above 5.0). However, this assessment was based on a sub-cohort  
44  
45 of only 84 AF patients and should be interpreted with caution.  
46  
47  
48  
49  
50

51  
52  
53 The higher mortality within the 30 days following a thromboembolic event in patients with  
54  
55 schizophrenia is a concern and emphasizes the need for vigilant follow-up in this patient population.  
56  
57  
58  
59  
60

1  
2  
3  
4 The finding is in line with prior studies reporting increased cardiac mortality in patients with  
5 schizophrenia.<sup>24,28</sup> Future studies are encouraged to explore potential reasons, which are likely  
6 multifactorial and may entail both severity of illness, comorbidity, quality of care, and factors  
7 beyond patient care.<sup>29</sup>  
8  
9  
10  
11  
12

### 13 14 15 *Conclusions*

16  
17 In conclusion, this study showed that AF patients with schizophrenia or severe depression were at  
18 increased risk of ischemic stroke and major bleeding. However, the fully adjusted hazard rates were  
19 comparable with matched comparisons, indicating that the excess risk is due to a higher prevalence  
20 of risk factors for stroke and bleeding and lower use of OAT in patients with mental disorders. In  
21 comparison, rates were not increased in patients with bipolar disease. Patients with schizophrenia  
22 further experienced higher mortality following a thromboembolic event than matched comparisons.  
23  
24 These findings highlight the importance of close attention to stroke and bleeding risk factors and  
25 potential disparities in receipt of OAT in AF patients with mental disorders. Our findings also  
26 identify challenges in the management of AF patients with mental disorders; the excess burden of  
27 stroke risk factors signifies the need for stroke prevention whereas the higher rates of major  
28 bleeding emphasize that cautious assessment of bleeding risk and quality of OAT may be  
29 particularly pertinent in these patients. In this respect, our findings indicate a need for optimized  
30 coordination and collaboration between general somatic and mental health services .  
31  
32  
33  
34  
35  
36  
37  
38  
39  
40  
41  
42  
43  
44  
45  
46  
47  
48  
49  
50  
51  
52  
53  
54  
55  
56  
57  
58  
59  
60

## ACKNOWLEDGEMENTS

### Author Contributions

MS, FS and JNK had full access to all of the data in this study and take responsibility for the integrity of the data and the accuracy of the data analysis. SR, SPH and TBL provided the idea for the study. MS, FS, TBL, SPH, and SR defined the study concept and performed the critical interpretation of the data. MS drafted the article. All authors contributed critical revisions and approved the final version to be published.

### Conflicts of Interest Disclosures

Associate Professor Larsen has served as an investigator for Janssen Scientific Affairs, LLC and Boehringer Ingelheim and has served as a speaker for Bayer, BMS/Pfizer, Boehringer Ingelheim. Senior Statistician Flemming Skjøth has served as a consultant for Bayer. Other authors – none declared.

### Role of the Funders/Sponsors

The Obel Family Foundation partly funded this research by an unrestricted grant. The sponsor had no role in the design and conduct of the study; collection, management, analysis, and interpretation of the data; and preparation, review, or approval of the manuscript.

**Ethics approval:** The study was approved by the Danish Data Protection Agency (Record number 2012-41-0633).

**Data sharing statement:** No additional data are available

**REFERENCES**

1. Hert M De, Dekker JM, Wood D, Kahl KG, Holt RIG, Möller H-J. Cardiovascular disease and diabetes in people with severe mental illness position statement from the European Psychiatric Association (EPA), supported by the European Association for the Study of Diabetes (EASD) and the European Society of Cardiology (ESC). *Eur Psychiatry*; 2009;**24**:412–424.
2. Laursen TM, Munk-Olsen T, Gasse C. Chronic somatic comorbidity and excess mortality due to natural causes in persons with schizophrenia or bipolar affective disorder. *PLoS One* 2011;**6**.
3. Bresee LC, Majumdar SR, Patten SB, Johnson JA. Prevalence of cardiovascular risk factors and disease in people with schizophrenia: A population-based study. *Schizophr Res*; 2010;**117**:75–82.
4. Bernardo M, Cañas F, Banegas JR, Casademont J, Riesgo Y, Varela C, RICAVA Study Group. Prevalence and awareness of cardiovascular risk factors in patients with schizophrenia: a cross-sectional study in a low cardiovascular disease risk geographical area. *Eur Psychiatry* 2009;**24**:431–441.
5. Osborn DPJ, Wright CA, Levy G, King MB, Deo R, Nazareth I. Relative risk of diabetes, dyslipidaemia, hypertension and the metabolic syndrome in people with severe mental illnesses: systematic review and metaanalysis. *BMC Psychiatry* 2008;**8**:84.
6. Correll CU, Detraux J, Lepeleire J De, Hert M De. Effects of antipsychotics, antidepressants and mood stabilizers on risk for physical diseases in people with schizophrenia, depression and bipolar disorder. *World Psychiatry* 2015;**14**:119–136.
7. Wang J, Liu Y, Zhu W, Zhang F, Zhou Z. Olanzapine-induced weight gain plays a key role in the potential cardiovascular risk: evidence from heart rate variability analysis. *Sci Rep* 2014;**4**:7394.

- 1  
2  
3  
4 8. Kirchhof P, Benussi S, Kotecha D, et al. 2016 ESC Guidelines for the management of  
5 atrial fibrillation developed in collaboration with EACTS. *Europace* 2016;**18**:1609–1678.  
6  
7
- 8  
9 9. Walker GA, Heidenreich PA, Phibbs CS, Go AS, Chiu VY, Schmitt SK, Ananth L,  
10 Frayne SM. Mental illness and warfarin use in atrial fibrillation. *Am J Manag Care* 2011;**17**:617–  
11  
12 624.  
13
- 14  
15 10. Schmitt SK, Turakhia MP, Phibbs CS, et al. Anticoagulation in atrial fibrillation:  
16 impact of mental illness. *Am J Manag Care* 2015;**21**:e609–e617.  
17  
18
- 19  
20 11. Paradise HT, Berlowitz DR, Ozonoff A, et al. Outcomes of anticoagulation therapy in  
21 patients with mental health conditions. *J Gen Intern Med* 2014;**29**:855–861.  
22  
23
- 24  
25 12. Rose AJ, Hylek EM, Ozonoff A, Ash AS, Reisman JI, Berlowitz DR. Patient  
26 characteristics associated with oral anticoagulation control: Results of the Veterans AffaiRs Study  
27 to Improve Anticoagulation (VARIA). *J Thromb Haemost* 2010;**8**:2182–2191.  
28  
29
- 30  
31 13. Schauer DP, Moomaw CJ, Wess M, Webb T, Eckman MH. Psychosocial risk factors  
32 for adverse outcomes in patients with nonvalvular atrial fibrillation receiving warfarin. *J Gen Intern*  
33  
34  
35  
36 *Med* 2005;**20**:1114–1119.
- 37  
38 14. Schmidt M, Schmidt SSAJ, Sandegaard JLJ, Ehrenstein V, Pedersen L, Sørensen HT.  
39 The Danish National Patient Registry: a review of content, data quality, and research potential. *Clin*  
40  
41  
42  
43 *Epidemiol* 2015;**7**:449–490.
- 44  
45 15. Pottegård A, Schmidt SAJ, Wallach-Kildemoes H, Sørensen HT, Hallas J, Schmidt M.  
46 Data Resource Profile: The Danish National Prescription Registry. *Int J Epidemiol* 2016;dyw213.  
47  
48
- 49  
50 16. Schmidt M, Pedersen L, Sørensen HT. The Danish Civil Registration System as a tool  
51 in epidemiology. *Eur J Epidemiol* 2014;**29**:541–549.  
52  
53  
54  
55  
56  
57  
58  
59  
60



- 1  
2  
3  
4 17. Thygesen LC, Daasnes C, Thaulow I, Brønnum-Hansen H. Introduction to Danish  
5 (nationwide) registers on health and social issues: structure, access, legislation, and archiving.  
6  
7  
8  
9 *Scand J Public Health* 2011;**39**:12–16.
- 10  
11 18. Sundbøll J, Adelborg K, Munch T, et al. Positive predictive value of cardiovascular  
12 diagnoses in the Danish National Patient Registry: a validation study. *BMJ Open* 2016;**6**:e012832.
- 13  
14 19. Iacus SM, King G, Porro G. Matching for causal inference without balance checking.  
15  
16  
17 *Available SSRN 1152391* 2008;1–17.
- 18  
19 20. Blackwell M, Iacus S, King G, Porro G. Cem: Coarsened exact matching in Stata.  
20  
21  
22 *Stata J* 2009;**9**:524–546.
- 23  
24 21. Lip GYH, Nieuwlaat R, Pisters R, Lane DA, Crijns HJGM. Refining clinical risk  
25 stratification for predicting stroke and thromboembolism in atrial fibrillation using a novel risk  
26 factor-based approach: the euro heart survey on atrial fibrillation. *Chest* 2010;**137**:263–272.
- 27  
28 22. Pisters R, Lane DA, Nieuwlaat R, Vos CB de, Crijns HJGM, Lip GYH. A novel user-  
29 friendly score (HAS-BLED) to assess 1-year risk of major bleeding in patients with atrial  
30 fibrillation: the Euro Heart Survey. *Chest* 2010;**138**:1093–1100.
- 31  
32 23. Laursen TM, Munk-Olsen T, Agerbo E, Gasse C, Mortensen PB. Somatic hospital  
33 contacts, invasive cardiac procedures, and mortality from heart disease in patients with severe  
34 mental disorder. *Arch Gen Psychiatry* 2009;**66**:713–720.
- 35  
36 24. Crump C, Winkleby M a, Sundquist K, Sundquist J. Comorbidities and mortality in  
37 persons with schizophrenia: a Swedish national cohort study. *Am J Psychiatry* 2013;**170**:324–333.
- 38  
39 25. Roth JA, Bradley K, Thummel KE, Veenstra DL, Boudreau D. Alcohol misuse,  
40 genetics, and major bleeding among warfarin therapy patients in a community setting.  
41  
42  
43  
44  
45  
46  
47  
48  
49  
50  
51  
52  
53  
54  
55  
56  
57  
58  
59  
60 *Pharmacoepidemiol Drug Saf* 2015;**24**:619–627.

- 1  
2  
3  
4 26. Sandén P, Renlund H, Svensson PJ, Själander A. Bleeding complications in venous  
5 thrombosis patients on well-managed warfarin. *J Thromb Thrombolysis* 2016;**41**:351–358.  
6  
7  
8 27. Lawrence D, Kisely S. Inequalities in healthcare provision for people with severe  
9 mental illness. *J Psychopharmacol* 2010;**24**:61–68.  
10  
11 28. Olfson M, Gerhard T, Huang C, Crystal S, Stroup TS. Premature Mortality Among  
12 Adults With Schizophrenia in the United States. *JAMA psychiatry* 2015;**72**:1172–1181.  
13  
14 29. Ringen PA, Engh JA, Birkenaes AB, Dieset I, Andreassen OA. Increased mortality in  
15 schizophrenia due to cardiovascular disease - a non-systematic review of epidemiology, possible  
16 causes and interventions. *Front Psychiatry* 2014;**5**:1–11.  
17  
18  
19  
20  
21  
22  
23  
24  
25  
26  
27  
28  
29  
30  
31  
32  
33  
34  
35  
36  
37  
38  
39  
40  
41  
42  
43  
44  
45  
46  
47  
48  
49  
50  
51  
52  
53  
54  
55  
56  
57  
58  
59  
60

## FIGURE LEGENDS

**Figure 1.** Cumulative incidence of ischemic stroke in patients with atrial fibrillation and mental disorders and matched atrial fibrillation patients without mental disorders.

**Figure 2.** Crude and adjusted hazard ratios (HR) with 95% confidence intervals (CI) for ischemic stroke, fatal thromboembolic events, and major bleeding in atrial fibrillation patients with severe mental disorders compared with matched atrial fibrillation patients without mental disorders.

**Figure 3.** Cumulative incidence of fatal thromboembolic events in patients with atrial fibrillation and mental disorders and matched atrial fibrillation patients without mental disorder.

**Figure 4.** Cumulative incidence of major bleeding in patients with atrial fibrillation and mental disorders and matched atrial fibrillation patients without mental disorder.

Table 1. Descriptive characteristics of patients with incident atrial fibrillation in Denmark according to presence of mental health disorders before matching.

| Characteristic, % (N)                                 | No mental disorder (N=252,238) | Schizophrenia (N=534) | Severe depression (N=400) | Bipolar disease (N=569) |
|-------------------------------------------------------|--------------------------------|-----------------------|---------------------------|-------------------------|
| Demographic characteristics                           |                                |                       |                           |                         |
| Females                                               | 46.7 (117,876)                 | 45.7 (244)            | 61.8 (247)                | 59.6 (339)              |
| Mean age (SD)                                         | 73.3 (13.1)                    | 64.5 (13.7)           | 73.7 (14.0)               | 73.0 (11.2)             |
| Stroke risk factors and comorbidity                   |                                |                       |                           |                         |
| Mean CHA <sub>2</sub> DS <sub>2</sub> VASc score (SD) | 3.1 (1.8)                      | 2.5 (1.7)             | 3.6 (2.0)                 | 3.3 (1.8)               |
| Mean HASBLED score (SD)                               | 2.2 (1.2)                      | 1.9 (1.3)             | 2.5 (1.4)                 | 2.5 (1.3)               |
| Prior stroke                                          | 16.9 (42,585)                  | 14.2 (76)             | 30.3 (121)                | 20.2 (115)              |
| Heart failure                                         | 25.7 (64,704)                  | 30.0 (160)            | 30.3 (121)                | 29.3 (167)              |
| Hypertension                                          | 42.6 (107,332)                 | 26.6 (142)            | 44.5 (178)                | 36.6 (208)              |
| Myocardial infarction                                 | 10.3 (26,089)                  | 8.2 (44)              | 11.3 (45)                 | 9.3 (53)                |
| Peripheral arterial disease                           | 7.6 (19,266)                   | 6.7 (36)              | 10.0 (40)                 | 9.0 (51)                |
| Diabetes                                              | 12.9 (32,606)                  | 24.3 (130)            | 15.8 (63)                 | 20.2 (115)              |
| Prior bleeding                                        | 26.4 (66,694)                  | 28.1 (150)            | 44.0 (176)                | 37.6 (214)              |
| Renal dysfunction                                     | 5.2 (13,003)                   | 10.1 (54)             | 8.5 (34)                  | 15.8 (90)               |
| Prior venous thromboembolism                          | 4.8 (12,081)                   | 7.3 (39)              | 10.8 (43)                 | 10.0 (57)               |
| Chronic pulmonary disease                             | 14.5 (36,615)                  | 28.7 (153)            | 22.3 (89)                 | 30.8 (175)              |
| Cancer                                                | 15.9 (40,171)                  | 12.9 (69)             | 14.8 (59)                 | 17.0 (97)               |
| Alcohol-related disease                               | 4.2 (10,471)                   | 19.1 (102)            | 11.0 (44)                 | 20.9 (119)              |
| Medication use within 365 days before index date      |                                |                       |                           |                         |
| Coumarin                                              | 14.4 (36,326)                  | 5.1 (27)              | 8.8 (35)                  | 12.1 (69)               |
| NOAC                                                  | 2.5 (6,347)                    | 3.4 (18)              | 2.3 (9)                   | 2.3 (13)                |
| Aspirin                                               | 37.6 (94,951)                  | 33.0 (176)            | 40.5 (162)                | 38.1 (217)              |
| Clopidogrel                                           | 4.3 (10,936)                   | 5.6 (30)              | 9.0 (36)                  | 5.6 (32)                |
| NSAID                                                 | 26.7 (67,468)                  | 25.1 (134)            | 27.3 (109)                | 25.0 (142)              |

|                                                      |               |            |            |            |
|------------------------------------------------------|---------------|------------|------------|------------|
| Digoxin                                              | 12.4 (31,200) | 9.9 (53)   | 8.8 (35)   | 12.1 (69)  |
| Non-loop diuretics                                   | 36.2 (91,336) | 25.1 (134) | 38.8 (155) | 34.4 (196) |
| Loop-diuretics                                       | 25.5 (64,337) | 34.8 (186) | 28.8 (115) | 36.0 (205) |
| Beta-blocker                                         | 32.2 (81,335) | 22.7 (121) | 28.0 (112) | 24.3 (138) |
| Calcium channel blocker                              | 25.5 (64,355) | 17.0 (91)  | 31.0 (124) | 25.1 (143) |
| Renin-angiotensin inhibitor                          | 35.5 (89,621) | 23.8 (127) | 37.5 (150) | 32.0 (182) |
| Statins                                              | 24.6 (62,166) | 23.2 (124) | 26.0 (104) | 27.4 (156) |
| Antiepileptics                                       | 4.0 (10,077)  | 24.3 (130) | 16.0 (64)  | 39.5 (225) |
| Anticholinergics                                     | 0.2 (456)     | 27.2 (145) | 2.3 (9)    | 5.3 (30)   |
| Antipsychotics, lithium and<br>anxiolytics/hypnotics | 27.1 (68,302) | 87.1 (465) | 63.2 (253) | 83.3 (474) |
| Antidepressants                                      | 14.5 (36,516) | 34.8 (186) | 78.5 (314) | 61.0 (347) |

Abbreviations:

SD: Standard deviation

NOAC: Non-vitamin K oral anticoagulant

NSAID: Non-steroidal anti-inflammatory drugs

**Table 2.** Number of events and rates of stroke, fatal thromboembolic events, and major bleeding at 5 years following incident atrial fibrillation.

| Characteristic                        | Patients | Ischemic stroke |      | Fatal thromboembolic events |      | Major bleeding |      |
|---------------------------------------|----------|-----------------|------|-----------------------------|------|----------------|------|
|                                       | N        | Events, N       | Rate | Events, N                   | Rate | Events, N      | Rate |
| Entire unmatched AF comparison cohort | 252,238  | 15,710          | 2.03 | 8,039                       | 1.00 | 26,711         | 3.53 |
| <i>Schizophrenia</i>                  |          |                 |      |                             |      |                |      |
| Schizophrenia                         | 534      | 25              | 1.96 | 19                          | 1.43 | 46             | 3.72 |
| Matched comparison cohort             | 2,669    | 114             | 1.30 | 47                          | 0.52 | 225            | 2.62 |
| <i>Severe depression</i>              |          |                 |      |                             |      |                |      |
| Severe depression                     | 400      | 28              | 2.74 | 11                          | 1.03 | 41             | 4.06 |
| Matched comparison cohort             | 2,000    | 113             | 1.93 | 50                          | 0.82 | 188            | 3.24 |
| <i>Bipolar disease</i>                |          |                 |      |                             |      |                |      |
| Bipolar disease                       | 569      | 28              | 1.90 | 20                          | 1.41 | 39             | 2.90 |
| Matched comparison cohort             | 2,845    | 164             | 2.04 | 74                          | 0.83 | 274            | 3.27 |

Rates are calculated as number of events divided by person-time per 100 years.

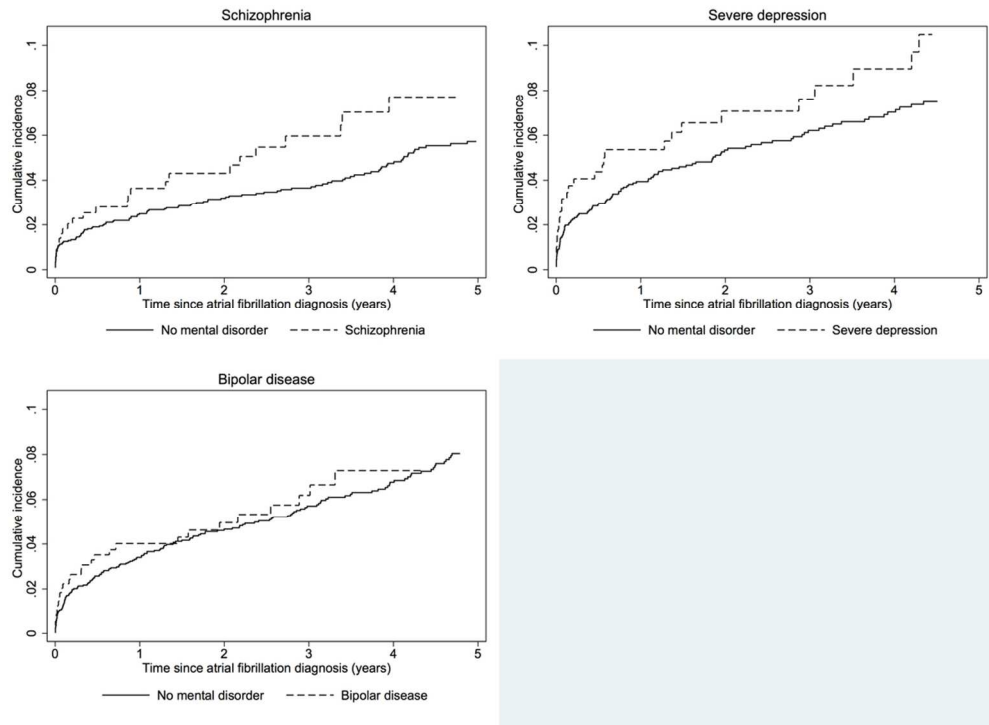

Figure 1

101x73mm (300 x 300 DPI)

View only

1  
2  
3  
4  
5  
6  
7  
8  
9  
10  
11  
12  
13  
14  
15  
16  
17  
18  
19  
20  
21  
22  
23  
24  
25  
26  
27  
28  
29  
30  
31  
32  
33  
34  
35  
36  
37  
38  
39  
40  
41  
42  
43  
44  
45  
46  
47  
48  
49  
50  
51  
52  
53  
54  
55  
56  
57  
58  
59  
60

1  
2  
3  
4  
5  
6  
7  
8  
9  
10  
11  
12  
13  
14  
15  
16  
17  
18  
19  
20  
21  
22  
23  
24  
25  
26  
27  
28  
29  
30  
31  
32  
33  
34  
35  
36  
37  
38  
39  
40  
41  
42  
43  
44  
45  
46  
47  
48  
49  
50  
51  
52  
53  
54  
55  
56  
57  
58  
59  
60



Figure 2

127x45mm (300 x 300 DPI)

Peer review only



1  
2  
3  
4  
5  
6  
7  
8  
9  
10  
11  
12  
13  
14  
15  
16  
17  
18  
19  
20  
21  
22  
23  
24  
25  
26  
27  
28  
29  
30  
31  
32  
33  
34  
35  
36  
37  
38  
39  
40  
41  
42  
43  
44  
45  
46  
47  
48  
49  
50  
51  
52  
53  
54  
55  
56  
57  
58  
59  
60



Figure 3

101x73mm (300 x 300 DPI)

Review only

1  
2  
3  
4  
5  
6  
7  
8  
9  
10  
11  
12  
13  
14  
15  
16  
17  
18  
19  
20  
21  
22  
23  
24  
25  
26  
27  
28  
29  
30  
31  
32  
33  
34  
35  
36  
37  
38  
39  
40  
41  
42  
43  
44  
45  
46  
47  
48  
49  
50  
51  
52  
53  
54  
55  
56  
57  
58  
59  
60



Figure 4

101x73mm (300 x 300 DPI)

Review only

## SUPPLEMENTAL INFORMATION

### **Atrial fibrillation in patients with severe mental disorders and the risk of stroke, fatal thromboembolic events, and bleeding: a nationwide cohort study**

Mette Søgaard, PhD<sup>1,2</sup>, Flemming Skjøth, PhD<sup>2,3</sup>, Jette Nordstrom Kjældgaard<sup>1,2</sup>, BSCEE, Torben Bjerregaard Larsen, PhD<sup>1,2,5</sup>, Søren Pihlkjær Hjortshøj, PhD<sup>4,5</sup>, Sam Riahi, PhD<sup>1,4,5</sup>

<sup>1</sup>Department of Cardiology, Aalborg University Hospital, Denmark

<sup>2</sup>Aalborg Thrombosis Research Unit, Department of Clinical Medicine, Faculty of Health, Aalborg University, Aalborg, Denmark

<sup>3</sup>Unit for Clinical Biostatistics, Aalborg University Hospital, Denmark

<sup>4</sup>Department of Clinical Medicine, Aalborg University, Denmark

<sup>5</sup>AF-Study group, Aalborg University Hospital, Denmark

#### **Supplementary tables and figures**

Supplementary Table 1: Definitions on comorbidity, concomitant medications, and study outcomes according to ICD-10 codes and ATC-codes.

Supplementary Table 2: Risk score definitions

Supplementary Table 3: Descriptive characteristics of AF patients with schizophrenia, severe depression, or bipolar disease and their matched comparison cohorts.

Supplementary Figure 1: Flowchart of the study population.

Supplementary Figure 2: Cumulative incidence curves of initiation of oral anticoagulation therapy in age, sex and calendar time matched atrial fibrillation patients with and without mental disorders.

**Supplementary Table 1.** Definitions on comorbidity, concomitant medication, and study outcomes according to ICD-10 codes and ATC-codes.

| <b>Diagnoses</b>                     | <b>International Classification of Diseases 10th revision (ICD-10) code</b>                                                                | <b>Anatomical Therapeutic Chemical (ATC) code</b> |
|--------------------------------------|--------------------------------------------------------------------------------------------------------------------------------------------|---------------------------------------------------|
| <b>Study population</b>              |                                                                                                                                            |                                                   |
| Atrial fibrillation                  | I48                                                                                                                                        |                                                   |
| <b>Exposure</b>                      |                                                                                                                                            |                                                   |
| Schizophrenia                        | F20                                                                                                                                        |                                                   |
| Bipolar disease                      | F30 F31                                                                                                                                    |                                                   |
| Severe depression                    | F322 F323 F332 F333                                                                                                                        |                                                   |
| <b>Outcomes</b>                      |                                                                                                                                            |                                                   |
| Ischemic stroke                      | I63 I64                                                                                                                                    |                                                   |
| Major bleeding                       | I60 I61 I62 K250 K252 K254<br>K260 K262 K264 K270 K272<br>K274 K280 K282 K290 K920<br>K921 K922 D62 J942 H113 H356<br>H431 N02 R04 R31 R58 |                                                   |
| Thromboembolic events                |                                                                                                                                            |                                                   |
| Ischemic stroke                      | I63 I64                                                                                                                                    |                                                   |
| Systemic embolism                    | I74                                                                                                                                        |                                                   |
| Pulmonary embolism                   | I26                                                                                                                                        |                                                   |
| Myocardial infarction                | I21 I23                                                                                                                                    |                                                   |
| <b>Baseline covariates</b>           |                                                                                                                                            |                                                   |
| Heart failure                        | I110 I130 I132 I420 I50                                                                                                                    |                                                   |
| Hypertension                         |                                                                                                                                            | See specified definition <sup>a</sup>             |
| Peripheral vascular/ischemic disease | I702 I703 I704 I705 I706 I707<br>I708 I709 I71 I739                                                                                        |                                                   |
| Diabetes                             | E100 E101 E109 E110 E111 E119                                                                                                              | A10                                               |
| Prior bleeding                       | K250 K252 K254 K260 K262<br>K264 K270 K272 K274 K280                                                                                       |                                                   |

|                                                  |                                                                                                              |                                                                              |
|--------------------------------------------------|--------------------------------------------------------------------------------------------------------------|------------------------------------------------------------------------------|
|                                                  | K282 K290 K920 K921 K922 D62<br>J942 H113 H356 H431 N02 R04<br>R31 R58                                       |                                                                              |
| Renal dysfunction                                | I12 I13 N00 N01 N02 N03 N04<br>N05 N07 N11 N14 N17 N18 N19<br>Q61                                            |                                                                              |
| Prior VTE                                        | I801 I802 I803 I808 I809 I819<br>I636 I676 I822 I823 I828 I829                                               |                                                                              |
| Chronic pulmonary disease                        | J40 J41 J42 J43 J44 J45 J46 J47<br>J60 J61 J62 J63 J64 J65 J67 J684<br>J701 J703 J841 J920 J961 J982<br>J983 |                                                                              |
| Cancer                                           | C                                                                                                            |                                                                              |
| Alcohol-related disease                          | E224 E529A F10 G312 G621<br>G721 I426 K292 K70 K860<br>L278A O354 T51 Z714 Z721                              |                                                                              |
| Medications within 365 days<br>before index date |                                                                                                              |                                                                              |
| Coumarin                                         |                                                                                                              | B01AA                                                                        |
| NOAC                                             |                                                                                                              | B01AF01 B01AF02 B01AE07                                                      |
| Aspirin                                          |                                                                                                              | B01AC06                                                                      |
| Clopidogrel                                      |                                                                                                              | B01AC04                                                                      |
| NSAID                                            |                                                                                                              | M01A                                                                         |
| Digoxin                                          |                                                                                                              | C01AA05                                                                      |
| Non-loop diuretics                               |                                                                                                              | C02DA C02L C03A C03B C03D<br>C03E C03X C07C C07D C08G<br>C09BA C09DA C09XA52 |
| Loop-diuretics                                   |                                                                                                              | C03C                                                                         |
| Beta-blocker                                     |                                                                                                              | C07                                                                          |
| Calcium channel blocker                          |                                                                                                              | C07F C08 C09BB C09DB                                                         |
| Renin-angiotensin inhibitor                      |                                                                                                              | C09                                                                          |
| Statins                                          |                                                                                                              | C10                                                                          |

Abbreviations: VTE, venous thromboembolism; NOAC, Non-vitamin K oral anticoagulant; NSAID, Non-steroidal anti-inflammatory drugs.

<sup>a</sup>We identified subjects with hypertension from combination treatment with at least two of the following classes of antihypertensive drugs:

I- Alpha adrenergic blockers (C02A, C02B, C02C)

1  
2  
3  
4  
5  
6  
7  
8  
9  
10  
11  
12  
13  
14  
15  
16  
17  
18  
19  
20  
21  
22  
23  
24  
25  
26  
27  
28  
29  
30  
31  
32  
33  
34  
35  
36  
37  
38  
39  
40  
41  
42  
43  
44  
45  
46  
47  
48  
49  
50  
51  
52  
53  
54  
55  
56  
57  
58  
59  
60

II· Non-loop diuretics (C02DA, C02L, C03A, C03B, C03D, C03E, C03X, C07C, C07D, C08G, C09BA, C09DA, C09XA52)

III· Vasodilators (C02DB, C02DD, C02DG, C04, C05)

IV· Beta blockers (C07)

V· Calcium channel blockers (C07F, C08, C09BB, C09DB)

VI· Renin-angiotensin system inhibitors (C09)

For peer review only

Supplementary Table 2. Risk score definitions.

| Risk score                                                                              | Points<br>if present |
|-----------------------------------------------------------------------------------------|----------------------|
| CHA <sub>2</sub> DS <sub>2</sub> VASc <sup>a</sup>                                      |                      |
| Congestive heart failure or Left Ventricular Dysfunction                                | 1                    |
| Hypertension                                                                            | 1                    |
| Age ≥ 65 years                                                                          | 1                    |
| Age ≥ 75 years                                                                          | 1                    |
| Diabetes mellitus                                                                       | 1                    |
| Stroke (ischemic stroke, transient ischemic disease or systemic embolism)               | 2                    |
| Vascular disease (myocardial infarction, peripheral arterial disease, or aortic plaque) | 1                    |
| Sex category (female)                                                                   | 1                    |
| HAS-BLED <sup>b</sup>                                                                   |                      |
| Hypertension                                                                            | 1                    |
| Abnormal renal function                                                                 | 1                    |
| Abnormal hepatic function                                                               | 1                    |
| Stroke (ischemic stroke or transient ischemic attack)                                   | 1                    |
| Bleeding                                                                                | 1                    |
| Labile international normalized ratio <sup>c</sup>                                      | 1                    |
| Elderly age (≥ 65 years)                                                                | 1                    |
| Drugs (aspirin, clopidogrel, or non-steroidal anti-inflammatory drugs)                  | 1                    |
| Alcohol intake                                                                          | 1                    |

<sup>a</sup>Reflects stroke risk in atrial fibrillation patients not in anticoagulant therapy (Lip GYH, Nieuwlaat R, Pisters R, Lane DA, Crijns HJGM. Refining clinical risk stratification for predicting stroke and thromboembolism in atrial fibrillation using a novel risk factor-based approach: the euro heart survey on atrial fibrillation. Chest 2010;137(2):263-72)

<sup>b</sup>Reflects bleeding risk in atrial fibrillation patients undergoing anticoagulant therapy (Pisters R, Lane DA, Nieuwlaat R, de Vos CB, Crijns HJGM, Lip GYH. A novel user-friendly score (HAS-BLED) to assess 1-year risk of major bleeding in patients with atrial fibrillation: the Euro Heart Survey. Chest 2010;138(5):1093-100).

<sup>c</sup>Not included due to unavailable information

1  
2  
3  
4  
5  
6  
7  
8  
9  
10  
11  
12  
13  
14  
15  
16  
17  
18  
19  
20  
21  
22  
23  
24  
25  
26  
27  
28  
29  
30  
31  
32  
33  
34  
35  
36  
37  
38  
39  
40  
41  
42  
43  
44  
45  
46  
47  
48  
49  
50  
51  
52  
53  
54  
55  
56  
57  
58  
59  
60

**Supplementary Figure 1.** Flowchart of the study population.



For peer review only



**Supplementary Table 3.** Descriptive characteristics of AF patients with schizophrenia, severe depression, or bipolar disease and their matched comparison cohorts.

| Characteristic, % (N)                                 | Schizophrenia          |               | Severe depression      |                   | Bipolar disease        |                 |
|-------------------------------------------------------|------------------------|---------------|------------------------|-------------------|------------------------|-----------------|
|                                                       | Matched AF comparisons | Schizophrenia | Matched AF comparisons | Severe depression | Matched AF comparisons | Bipolar disease |
| Total number                                          | 2,669                  | 534           | 2,000                  | 400               | 2,845                  | 569             |
| Females                                               | 45.7 (1,219)           | 45.7 (244)    | 61.8 (1,235)           | 61.8 (247)        | 59.6 (1,695)           | 59.6 (339)      |
| Mean age (SD)                                         | 64.5 (13.7)            | 64.5 (13.7)   | 73.5 (14.0)            | 73.7 (14.0)       | 73.1 (11.2)            | 73.0 (11.2)     |
| Mean CHA <sub>2</sub> DS <sub>2</sub> VASc score (SD) | 2.3 (1.8)              | 2.5 (1.7)     | 3.3 (1.8)              | 3.6 (2.0)         | 3.2 (1.8)              | 3.3 (1.8)       |
| Mean HASBLED score (SD)                               | 1.8 (1.3)              | 1.9 (1.3)     | 2.2 (1.2)              | 2.5 (1.4)         | 2.2 (1.2)              | 2.5 (1.3)       |
| Prior stroke                                          | 13.3 (355)             | 14.2 (76)     | 17.9 (358)             | 30.3 (121)        | 17.8 (505)             | 20.2 (115)      |
| Heart failure                                         | 19.4 (518)             | 30.0 (160)    | 23.4 (469)             | 30.3 (121)        | 25.3 (720)             | 29.3 (167)      |
| Hypertension                                          | 38.6 (1030)            | 26.6 (142)    | 44.1 (882)             | 44.5 (178)        | 45.2 (1287)            | 36.6 (208)      |
| Myocardial infarction                                 | 6.9 (185)              | 8.2 (44)      | 10.7 (213)             | 11.3 (45)         | 9.6 (273)              | 9.3 (53)        |
| Peripheral arterial disease                           | 5.7 (152)              | 6.7 (36)      | 8.1 (161)              | 10.0 (40)         | 7.1 (201)              | 9.0 (51)        |
| Diabetes                                              | 12.9 (344)             | 24.3 (130)    | 12.9 (259)             | 15.8 (63)         | 12.6 (358)             | 20.2 (115)      |
| Prior bleeding                                        | 13.0 (346)             | 28.1 (150)    | 15.4 (307)             | 24.0 (96)         | 14.4 (409)             | 23.0 (131)      |
| Renal dysfunction                                     | 4.8 (127)              | 10.1 (54)     | 4.1 (82)               | 8.5 (34)          | 5.1 (144)              | 15.8 (90)       |
| Prior venous thromboembolism                          | 4.8 (128)              | 7.3 (39)      | 5.9 (119)              | 10.8 (43)         | 4.7 (135)              | 10.0 (57)       |
| Chronic pulmonary disease                             | 13.3 (355)             | 28.7 (153)    | 14.9 (299)             | 22.3 (89)         | 16.1 (458)             | 30.8 (175)      |
| Cancer                                                | 12.9 (345)             | 12.9 (69)     | 17.9 (357)             | 14.8 (59)         | 17.3 (493)             | 17.0 (97)       |
| Alcohol-related disease                               | 5.9 (158)              | 19.1 (102)    | 3.6 (73)               | 11.0 (44)         | 4.3 (122)              | 20.9 (119)      |

|    |                                                      |            |            |            |            |             |            |
|----|------------------------------------------------------|------------|------------|------------|------------|-------------|------------|
| 1  |                                                      |            |            |            |            |             |            |
| 2  | Coumarin                                             | 13.3 (356) | 5.1 (27)   | 13.7 (273) | 8.8 (35)   | 14.3 (407)  | 12.1 (69)  |
| 3  |                                                      |            |            |            |            |             |            |
| 4  | NOAC                                                 | 3.7 (99)   | 3.4 (18)   | 2.8 (56)   | 2.3 (9)    | 3.4 (98)    | 2.3 (13)   |
| 5  |                                                      |            |            |            |            |             |            |
| 6  | Aspirin                                              | 29.6 (790) | 33.0 (176) | 37.2 (744) | 40.5 (162) | 37.7 (1073) | 38.1 (217) |
| 7  |                                                      |            |            |            |            |             |            |
| 8  | Clopidogrel                                          | 4.3 (116)  | 5.6 (30)   | 5.3 (106)  | 9.0 (36)   | 5.0 (143)   | 5.6 (32)   |
| 9  |                                                      |            |            |            |            |             |            |
| 10 | NSAID                                                | 27.1 (722) | 25.1 (134) | 27.1 (542) | 27.3 (109) | 26.2 (745)  | 25.0 (142) |
| 11 |                                                      |            |            |            |            |             |            |
| 12 | Digoxin                                              | 6.8 (182)  | 9.9 (53)   | 9.3 (187)  | 8.8 (35)   | 10.7 (304)  | 12.1 (69)  |
| 13 |                                                      |            |            |            |            |             |            |
| 14 | Non-loop diuretics                                   | 31.4 (839) | 25.1 (134) | 38.2 (764) | 38.8 (155) | 38.3 (1089) | 34.4 (196) |
| 15 |                                                      |            |            |            |            |             |            |
| 16 | Loop-diuretics                                       | 18.7 (500) | 34.8 (186) | 24.4 (488) | 28.8 (115) | 23.7 (675)  | 36.0 (205) |
| 17 |                                                      |            |            |            |            |             |            |
| 18 | Beta-blocker                                         | 31.4 (837) | 22.7 (121) | 33.8 (676) | 28.0 (112) | 34.4 (980)  | 24.3 (138) |
| 19 |                                                      |            |            |            |            |             |            |
| 20 | Calcium channel blocker                              | 22.1 (591) | 17.0 (91)  | 27.1 (543) | 31.0 (124) | 26.5 (753)  | 25.1 (143) |
| 21 |                                                      |            |            |            |            |             |            |
| 22 | Renin-angiotensin inhibitor                          | 34.2 (914) | 23.8 (127) | 37.0 (741) | 37.5 (150) | 39.2 (1115) | 32.0 (182) |
| 23 |                                                      |            |            |            |            |             |            |
| 24 | Statins                                              | 26.4 (704) | 23.2 (124) | 26.6 (531) | 26.0 (104) | 28.3 (804)  | 27.4 (156) |
| 25 |                                                      |            |            |            |            |             |            |
| 26 | Antiepileptics                                       | 3.6 (95)   | 24.3 (130) | 4.7 (94)   | 16.0 (64)  | 4.5 (129)   | 39.5 (225) |
| 27 |                                                      |            |            |            |            |             |            |
| 28 | Anticholinergics                                     | <4         | <4         | 0.2 (4)    | 2.3 (9)    | 0.1 (4)     | 5.3 (30)   |
| 29 |                                                      |            |            |            |            |             |            |
| 30 | Antipsychotics, lithium and<br>anxiolytics/hypnotics | 21.4 (571) | 87.1 (465) | 26.6 (532) | 63.2 (253) | 28.8 (820)  | 83.3 (474) |
| 31 |                                                      |            |            |            |            |             |            |
| 32 | Antidepressants                                      | 14.1 (375) | 34.8 (186) | 16.1 (323) | 78.5 (314) | 15.9 (453)  | 61.0 (347) |

Abbreviations:

SD: Standard deviation

NOAC: Non-vitamin K oral anticoagulant

NSAID: Non-steroidal anti-inflammatory drugs

**Supplementary Figure 2.** Cumulative incidence curves of initiation of oral anticoagulation therapy in age, sex and calendar time matched atrial fibrillation patients with and without mental disorders.



## STROBE (Strengthening The Reporting of OBServational Studies in Epidemiology) Checklist

A checklist of items that should be included in reports of observational studies. You must report the page number in your manuscript where you consider each of the items listed in this checklist. If you have not included this information, either revise your manuscript accordingly before submitting or note N/A.

**Note:** An Explanation and Elaboration article discusses each checklist item and gives methodological background and published examples of transparent reporting. The STROBE checklist is best used in conjunction with this article (freely available on the Web sites of PLoS Medicine at <http://www.plosmedicine.org/>, Annals of Internal Medicine at <http://www.annals.org/>, and Epidemiology at <http://www.epidem.com/>). Information on the STROBE Initiative is available at [www.strobe-statement.org](http://www.strobe-statement.org).

| Section and Item     | Item No. | Recommendation                                                                                                                                                                                                                                                                                                                                                                                                                                                                 | Reported on Page No. |
|----------------------|----------|--------------------------------------------------------------------------------------------------------------------------------------------------------------------------------------------------------------------------------------------------------------------------------------------------------------------------------------------------------------------------------------------------------------------------------------------------------------------------------|----------------------|
| Title and Abstract   | 1        | (a) Indicate the study's design with a commonly used term in the title or the abstract                                                                                                                                                                                                                                                                                                                                                                                         |                      |
|                      |          | (b) Provide in the abstract an informative and balanced summary of what was done and what was found                                                                                                                                                                                                                                                                                                                                                                            |                      |
| <b>Introduction</b>  |          |                                                                                                                                                                                                                                                                                                                                                                                                                                                                                |                      |
| Background/Rationale | 2        | Explain the scientific background and rationale for the investigation being reported                                                                                                                                                                                                                                                                                                                                                                                           |                      |
| Objectives           | 3        | State specific objectives, including any prespecified hypotheses                                                                                                                                                                                                                                                                                                                                                                                                               |                      |
| <b>Methods</b>       |          |                                                                                                                                                                                                                                                                                                                                                                                                                                                                                |                      |
| Study Design         | 4        | Present key elements of study design early in the paper                                                                                                                                                                                                                                                                                                                                                                                                                        |                      |
| Setting              | 5        | Describe the setting, locations, and relevant dates, including periods of recruitment, exposure, follow-up, and data collection                                                                                                                                                                                                                                                                                                                                                |                      |
| Participants         | 6        | (a) <i>Cohort study</i> —Give the eligibility criteria, and the sources and methods of selection of participants. Describe methods of follow-up<br><br><i>Case-control study</i> —Give the eligibility criteria, and the sources and methods of case ascertainment and control selection. Give the rationale for the choice of cases and controls<br><br><i>Cross-sectional study</i> —Give the eligibility criteria, and the sources and methods of selection of participants |                      |
|                      |          | (b) <i>Cohort study</i> —For matched studies, give matching criteria and number of exposed and unexposed<br><br><i>Case-control study</i> —For matched studies, give matching criteria and the number of controls per case                                                                                                                                                                                                                                                     |                      |
| Variables            | 7        | Clearly define all outcomes, exposures, predictors, potential confounders, and effect modifiers. Give diagnostic criteria, if applicable                                                                                                                                                                                                                                                                                                                                       |                      |

| Section and Item             | Item No. | Recommendation                                                                                                                                                                                                                                                                                            | Reported on Page No. |
|------------------------------|----------|-----------------------------------------------------------------------------------------------------------------------------------------------------------------------------------------------------------------------------------------------------------------------------------------------------------|----------------------|
| Data Sources/<br>Measurement | 8*       | For each variable of interest, give sources of data and details of methods of assessment (measurement). Describe comparability of assessment methods if there is more than one group                                                                                                                      |                      |
| Bias                         | 9        | Describe any efforts to address potential sources of bias                                                                                                                                                                                                                                                 |                      |
| Study Size                   | 10       | Explain how the study size was arrived at                                                                                                                                                                                                                                                                 |                      |
| Quantitative Variables       | 11       | Explain how quantitative variables were handled in the analyses. If applicable, describe which groupings were chosen and why                                                                                                                                                                              |                      |
| Statistical Methods          | 12       | (a) Describe all statistical methods, including those used to control for confounding                                                                                                                                                                                                                     |                      |
|                              |          | (b) Describe any methods used to examine subgroups and interactions                                                                                                                                                                                                                                       |                      |
|                              |          | (c) Explain how missing data were addressed                                                                                                                                                                                                                                                               |                      |
|                              |          | (d) <i>Cohort study</i> —If applicable, explain how loss to follow-up was addressed<br><i>Case-control study</i> —If applicable, explain how matching of cases and controls was addressed<br><i>Cross-sectional study</i> —If applicable, describe analytical methods taking account of sampling strategy |                      |
|                              |          | (e) Describe any sensitivity analyses                                                                                                                                                                                                                                                                     |                      |
| <b>Results</b>               |          |                                                                                                                                                                                                                                                                                                           |                      |
| Participants                 | 13*      | (a) Report numbers of individuals at each stage of study—eg numbers potentially eligible, examined for eligibility, confirmed eligible, included in the study, completing follow-up, and analysed                                                                                                         |                      |
|                              |          | (b) Give reasons for non-participation at each stage                                                                                                                                                                                                                                                      |                      |
|                              |          | (c) Consider use of a flow diagram                                                                                                                                                                                                                                                                        |                      |
| Descriptive Data             | 14*      | (a) Give characteristics of study participants (eg demographic, clinical, social) and information on exposures and potential confounders                                                                                                                                                                  |                      |
|                              |          | (b) Indicate number of participants with missing data for each variable of interest                                                                                                                                                                                                                       |                      |
|                              |          | (c) <i>Cohort study</i> —Summarise follow-up time (eg, average and total amount)                                                                                                                                                                                                                          |                      |
| Outcome Data                 | 15*      | <i>Cohort study</i> —Report numbers of outcome events or summary measures over time                                                                                                                                                                                                                       |                      |
|                              |          | <i>Case-control study</i> —Report numbers in each exposure category, or summary measures of exposure                                                                                                                                                                                                      |                      |
|                              |          | <i>Cross-sectional study</i> —Report numbers of outcome events or summary measures                                                                                                                                                                                                                        |                      |

| Section and Item         | Item No. | Recommendation                                                                                                                                                                                               | Reported on Page No. |
|--------------------------|----------|--------------------------------------------------------------------------------------------------------------------------------------------------------------------------------------------------------------|----------------------|
| Main Results             | 16       | (a) Give unadjusted estimates and, if applicable, confounder-adjusted estimates and their precision (eg, 95% confidence interval). Make clear which confounders were adjusted for and why they were included |                      |
|                          |          | (b) Report category boundaries when continuous variables were categorized                                                                                                                                    |                      |
|                          |          | (c) If relevant, consider translating estimates of relative risk into absolute risk for a meaningful time period                                                                                             |                      |
| Other Analyses           | 17       | Report other analyses done—eg analyses of subgroups and interactions, and sensitivity analyses                                                                                                               |                      |
| <b>Discussion</b>        |          |                                                                                                                                                                                                              |                      |
| Key Results              | 18       | Summarise key results with reference to study objectives                                                                                                                                                     |                      |
| Limitations              | 19       | Discuss limitations of the study, taking into account sources of potential bias or imprecision. Discuss both direction and magnitude of any potential bias                                                   |                      |
| Interpretation           | 20       | Give a cautious overall interpretation of results considering objectives, limitations, multiplicity of analyses, results from similar studies, and other relevant evidence                                   |                      |
| Generalisability         | 21       | Discuss the generalisability (external validity) of the study results                                                                                                                                        |                      |
| <b>Other Information</b> |          |                                                                                                                                                                                                              |                      |
| Funding                  | 22       | Give the source of funding and the role of the funders for the present study and, if applicable, for the original study on which the present article is based                                                |                      |

\*Give information separately for cases and controls in case-control studies and, if applicable, for exposed and unexposed groups in cohort and cross-sectional studies.

**Once you have completed this checklist, please save a copy and upload it as part of your submission. DO NOT include this checklist as part of the main manuscript document. It must be uploaded as a separate file.**
